# Supplementary material
Source: ML conference proceedings conference paper supplement (https://openreview.net/forum?id=ChWo6qLgILf)
Supplement: supplementary_material [file attachment]

## Sheet: Main
C50
IR	Measured	Old	New	Old Error	New Error
1	3.71754	12.0181	6.06731	8.30054	2.34977
2	5.40006	9.94025	5.24064	4.5402	0.159413
3	4.5282	14.4151	7.33145	9.88688	2.80326
4	5.32165	13.6977	7.20382	8.37607	1.88217
5	6.90367	8.80311	4.08604	1.89943	2.81764
6	4.04553	14.3622	7.73063	10.3166	3.6851
7	3.31704	4.53975	2.05148	1.22271	1.26557
Average	4.74767	11.1109	5.67305	6.36321	2.13756
C80
IR	Measured	Old	New	Old Error	New Error
1	5.34439	13.5026	7.76482	8.15822	2.42042
2	10.2849	13.8278	9.55079	3.54292	0.734109
3	6.16765	15.6625	8.74606	9.49481	2.57841
4	6.69294	15.3147	8.99613	8.6218	2.30319
5	10.0075	11.8406	7.59607	1.83306	2.41146
6	6.24015	16.0298	9.57115	9.78965	3.33101
7	7.132	7.89159	5.84954	0.759599	1.28246
Average	7.40994	13.4385	8.29637	6.02858	2.15158
RT60
IR	Measured	Old	New	Old Error %	New Error %
1	1.47618	1.65562	1.65673	12.1557	12.231
2	0.503969	0.563774	0.57392	11.8668	13.88
3	1.49375	1.66063	1.61037	11.1725	7.80783
4	1.53614	1.59901	1.61876	4.09254	5.37842
5	1.30122	1.59598	1.59598	22.6528	22.6528
6	1.41866	1.67454	1.67615	18.0367	18.1499
7	0.682641	0.730463	0.730463	7.00544	7.00544
Average	1.20179	1.35429	1.35177	12.4261	12.4436
DRR
IR	Measured	SoundSpaces	Soundspaces 2.0	Old Error	New Error
1	-5.32062	4.49391	-6.10442	9.81453	0.783795
2	-10.4626	2.13048	-8.49698	12.5931	1.96565
3	-3.63661	6.52102	-3.7662	10.1576	0.129596
4	-3.94647	5.51773	-4.99335	9.4642	1.04688
5	-9.25585	2.02734	-8.73741	11.2832	0.518443
6	-6.90544	5.83268	-4.5941	12.7381	2.31134
7	-13.4514	-2.82716	-13.5696	10.6243	0.118196
Average	-7.56843	3.38514	7.1803	10.9536	0.981986

## Sheet: IR1
Measured					Old					New					Comparison
Bands	63	1000	16000		Bands	63	1000	16000		Bands	63	1000	16000
RT60	1.63273	1.47618	1.07714		RT60	1.36393	1.65562	0.834208		RT60	1.35692	1.65673	0.834208
EDT	0	0	0		EDT	0	0	0		EDT	0	0	0
DRR	-43.7137	-5.32062	-5.91465		DRR	-19.1036	4.49391	6.17423		DRR	-26.1172	-6.10442	-4.81767
C50	6.86214	3.71754	4.17676		C50	5.87828	12.0181	15.8003		C50	4.74548	6.06731	9.58422
C80	7.34073	5.34439	6.51763		C80	7.46825	13.5026	18.154		C80	6.53154	7.76482	12.0837
D50	82.9214	70.1823	72.3469		D50	79.4705	94.0881	97.4373		D50	74.8887	80.1715	90.0863
TS	0.039067	0.05238	0.045073		TS	0.043044	0.011914	0.004804		TS	0.052083	0.038752	0.018205			Bias:	-12		12.2061	2.02461
Bands	63	1000	16000		Bands	63	1000	16000		Bands	63	1000	16000		Time	Measured	SoundSpaces	SoundSpaces 2.0	Error 1	Error 2
0.0025	-2.90779	2.96256	-6.48477		0.0025	-40.5325	-9.53917	-3.03694		0.0025	-22.8123	-10.8998	-4.12605		0.0025	-9.03744	-9.53917	-10.8998	0.501729	1.86233
0.0075	2.31655	0.828731	-6.01319		0.0075	-22.2402	-18.771	-15.0501		0.0075	-21.8784	-7.34013	-2.28385		0.0075	-11.1713	-18.771	-7.34013	7.59978	3.83114
0.0125	-2.9012	-3.81861	-4.442		0.0125	-30.7689	-18.2742	-13.276		0.0125	-12.7239	-15.4298	-11.6216		0.0125	-15.8186	-18.2742	-15.4298	2.45561	0.388828
0.0175	-14.3322	-7.36841	-12.122		0.0175	-24.4136	-26.289	-22.6137		0.0175	-15.6796	-18.2159	-12.0637		0.0175	-19.3684	-26.289	-18.2159	6.92056	1.15255
0.0225	-8.72597	-9.66405	-14.892		0.0225	-26.3667	-29.2387	-23.0558		0.0225	-20.571	-21.6438	-14.5727		0.0225	-21.6641	-29.2387	-21.6438	7.57465	0.020233
0.0275	-11.6983	-9.48342	-13.3774		0.0275	-30.5055	-32.6345	-25.5648		0.0275	-22.4555	-19.0675	-12.4607		0.0275	-21.4834	-32.6345	-19.0675	11.1511	2.41589
0.0325	-16.7849	-8.88373	-12.1995		0.0325	-32.1745	-30.0606	-23.4528		0.0325	-21.0273	-21.2805	-16.1351		0.0325	-20.8837	-30.0606	-21.2805	9.17683	0.396763
0.0375	-12.7384	-8.4024	-10.3412		0.0375	-30.9344	-32.2726	-27.1272		0.0375	-25.8082	-20.4351	-13.4956		0.0375	-20.4024	-32.2726	-20.4351	11.8702	0.032689
0.0425	-6.64209	-5.64936	-12.7103		0.0425	-35.8806	-31.4271	-24.4877		0.0425	-25.5583	-21.615	-16.3041		0.0425	-17.6494	-31.4271	-21.615	13.7777	3.96564
0.0475	-9.28695	-6.72267	-10.8185		0.0475	-34.9977	-32.6071	-27.2962		0.0475	-29.9405	-21.9929	-16.5702		0.0475	-18.7227	-32.6071	-21.9929	13.8845	3.27018
0.0525	-20.2153	-9.29269	-13.1276		0.0525	-39.8185	-32.9849	-27.5623		0.0525	-29.1649	-22.5752	-16.793		0.0525	-21.2927	-32.9849	-22.5752	11.6922	1.28253
0.0575	-18.9928	-10.0617	-13.8816		0.0575	-39.0771	-33.5673	-27.7851		0.0575	-25.782	-22.5222	-18.459		0.0575	-22.0617	-33.5673	-22.5222	11.5056	0.460497
0.0625	-25.3122	-9.41955	-15.2629		0.0625	-36.0715	-33.5143	-29.4511		0.0625	-29.4207	-22.8241	-19.8094		0.0625	-21.4195	-33.5143	-22.8241	12.0948	1.40456
0.0675	-22.3124	-10.0165	-14.5072		0.0675	-39.2442	-33.8162	-30.8015		0.0675	-27.3212	-21.8078	-18.6994		0.0675	-22.0165	-33.8162	-21.8078	11.7997	0.208705
0.0725	-18.4305	-8.91065	-16.4415		0.0725	-37.6478	-32.7999	-29.6915		0.0725	-26.2775	-23.1303	-20.3844		0.0725	-20.9107	-32.7999	-23.1303	11.8893	2.21965
0.0775	-15.4871	-8.86812	-14.8571		0.0775	-36.6944	-34.1224	-31.3765		0.0775	-26.8246	-24.1289	-19.6929		0.0775	-20.8681	-34.1224	-24.1289	13.2543	3.26082
0.0825	-14.4577	-8.39686	-16.7465		0.0825	-36.9997	-35.121	-30.685		0.0825	-28.7023	-23.2478	-18.5083		0.0825	-20.3969	-35.121	-23.2478	14.7242	2.85096
0.0875	-14.7841	-10.4587	-16.9478		0.0875	-38.618	-34.2399	-29.5004		0.0875	-31.3221	-25.7205	-20.8755		0.0875	-22.4587	-34.2399	-25.7205	11.7812	3.26183
0.0925	-19.7166	-10.2301	-15.9653		0.0925	-41.1036	-36.7126	-31.8676		0.0925	-27.7742	-25.366	-21.1824		0.0925	-22.2301	-36.7126	-25.366	14.4826	3.1359
0.0975	-25.1019	-9.20978	-15.7346		0.0975	-38.0168	-36.3581	-32.1745		0.0975	-29.3137	-26.237	-21.9602		0.0975	-21.2098	-36.3581	-26.237	15.1483	5.02717
0.1025	-16.3006	-9.86513	-18.8855		0.1025	-39.5975	-37.2291	-32.9523		0.1025	-28.8406	-25.6162	-21.5151		0.1025	-21.8651	-37.2291	-25.6162	15.3639	3.75105
0.1075	-14.1262	-10.1061	-16.7012		0.1075	-38.813	-36.6083	-32.5072		0.1075	-30.6503	-25.3541	-21.9574		0.1075	-22.1061	-36.6083	-25.3541	14.5022	3.24805
0.1125	-21.4091	-12.6774	-19.5613		0.1125	-40.4449	-36.3462	-32.9495		0.1125	-30.58	-26.4779	-22.8734		0.1125	-24.6774	-36.3462	-26.4779	11.6688	1.80042
0.1175	-23.9792	-11.5316	-16.2434		0.1175	-40.3288	-37.47	-33.8655		0.1175	-30.6152	-25.3661	-23.2849		0.1175	-23.5316	-37.47	-25.3661	13.9384	1.83457
0.1225	-15.9959	-12.4844	-17.6159		0.1225	-40.6443	-36.3583	-34.277		0.1225	-30.9717	-25.4354	-23.9149		0.1225	-24.4844	-36.3583	-25.4354	11.8738	0.950949
0.1275	-19.2979	-12.1561	-18.3186		0.1275	-40.7477	-36.4275	-34.9069		0.1275	-31.8792	-26.7409	-23.7211		0.1275	-24.1561	-36.4275	-26.7409	12.2714	2.58482
0.1325	-11.7794	-11.4605	-20.1585		0.1325	-41.8013	-37.733	-34.7132		0.1325	-30.413	-27.0766	-24.3409		0.1325	-23.4605	-37.733	-27.0766	14.2725	3.61605
0.1375	-14.705	-12.3779	-18.8145		0.1375	-40.3974	-38.0686	-35.333		0.1375	-30.6484	-26.8248	-24.9254		0.1375	-24.3779	-38.0686	-26.8248	13.6908	2.44695
0.1425	-19.0009	-12.7689	-20.1424		0.1425	-40.4466	-37.8169	-35.9175		0.1425	-31.1867	-27.4286	-24.8502		0.1425	-24.7689	-37.8169	-27.4286	13.048	2.65972
0.1475	-13.7517	-14.5487	-18.1762		0.1475	-41.0696	-38.4207	-35.8423		0.1475	-29.7592	-27.1227	-25.8876		0.1475	-26.5487	-38.4207	-27.1227	11.872	0.574026
0.1525	-18.5777	-13.6676	-18.932		0.1525	-39.7248	-38.1148	-36.8797		0.1525	-31.0944	-26.1794	-25.3912		0.1525	-25.6676	-38.1148	-26.1794	12.4472	0.511816
0.1575	-20.4636	-14.098	-20.1927		0.1575	-40.8121	-37.1716	-36.3833		0.1575	-33.3997	-27.5611	-26.6078		0.1575	-26.098	-37.1716	-27.5611	11.0736	1.46306
0.1625	-15.1816	-13.5311	-19.9742		0.1625	-42.9552	-38.5532	-37.5999		0.1625	-33.6614	-27.1304	-26.3963		0.1625	-25.5311	-38.5532	-27.1304	13.0221	1.59933
0.1675	-20.9074	-12.8831	-19.2223		0.1675	-43.0976	-38.1225	-37.3884		0.1675	-33.4726	-27.5582	-27.3914		0.1675	-24.8831	-38.1225	-27.5582	13.2394	2.67512
0.1725	-22.0907	-13.8828	-20.8564		0.1725	-43.1922	-38.5503	-38.3835		0.1725	-32.999	-26.6231	-27.0958		0.1725	-25.8828	-38.5503	-26.6231	12.6675	0.740351
0.1775	-15.7409	-13.4757	-20.773		0.1775	-42.7111	-37.6152	-38.0878		0.1775	-31.3989	-26.9059	-26.8022		0.1775	-25.4757	-37.6152	-26.9059	12.1395	1.43017
0.1825	-20.7731	-11.8765	-21.6152		0.1825	-41.3293	-37.898	-37.7943		0.1825	-31.9488	-27.3421	-27.2079		0.1825	-23.8765	-37.898	-27.3421	14.0215	3.46558
0.1875	-18.9725	-14.3061	-20.5963		0.1875	-41.8376	-38.3342	-38.2		0.1875	-31.5149	-29.5603	-30.217		0.1875	-26.3061	-38.3342	-29.5603	12.0282	3.25424
0.1925	-19.3302	-14.7771	-24.2652		0.1925	-41.432	-40.5524	-41.2091		0.1925	-33.9448	-29.7209	-28.9782		0.1925	-26.7771	-40.5524	-29.7209	13.7753	2.94374
0.1975	-18.1686	-14.6709	-21.251		0.1975	-43.6173	-40.713	-39.9703		0.1975	-34.1699	-28.664	-29.0516		0.1975	-26.6709	-40.713	-28.664	14.0421	1.99312
0.2025	-23.3208	-14.9137	-26.0006		0.2025	-43.8393	-39.6562	-40.0437		0.2025	-37.9733	-28.2915	-29.853		0.2025	-26.9137	-39.6562	-28.2915	12.7424	1.37776
0.2075	-23.7502	-15.5691	-22.7908		0.2075	-47.0348	-39.2836	-40.8451		0.2075	-37.3914	-30.6456	-29.3119		0.2075	-27.5691	-39.2836	-30.6456	11.7145	3.07648
0.2125	-16.4585	-14.9466	-21.1163		0.2125	-46.8111	-41.6377	-40.304		0.2125	-37.2312	-29.075	-30.6907		0.2125	-26.9466	-41.6377	-29.075	14.691	2.12832
0.2175	-18.5777	-16.4752	-22.4405		0.2175	-46.8427	-40.0671	-41.6828		0.2175	-33.0187	-29.3865	-29.5784		0.2175	-28.4752	-40.0671	-29.3865	11.5919	0.911343
0.2225	-26.8111	-16.8414	-24.4347		0.2225	-43.1544	-40.3786	-40.5705		0.2225	-36.654	-29.7391	-30.4925		0.2225	-28.8414	-40.3786	-29.7391	11.5372	0.897658
0.2275	-22.8879	-17.3688	-23.0129		0.2275	-46.6887	-40.7312	-41.4845		0.2275	-34.3614	-29.8245	-30.6941		0.2275	-29.3688	-40.7312	-29.8245	11.3624	0.455686
0.2325	-25.5299	-17.9806	-24.1908		0.2325	-44.4242	-40.8166	-41.6861		0.2325	-35.0004	-31.4253	-32.5865		0.2325	-29.9806	-40.8166	-31.4253	10.8361	1.44468
0.2375	-29.6935	-16.8278	-23.7425		0.2375	-44.971	-42.4174	-43.5786		0.2375	-34.6007	-30.533	-30.4497		0.2375	-28.8278	-42.4174	-30.533	13.5896	1.70526
0.2425	-23.4068	-17.9168	-24.7006		0.2425	-44.7566	-41.5251	-41.4418		0.2425	-34.4591	-31.2733	-32.8486		0.2425	-29.9168	-41.5251	-31.2733	11.6083	1.35656
0.2475	-26.5035	-18.0609	-27.344		0.2475	-44.4514	-42.2655	-43.8407		0.2475	-35.5097	-31.3734	-32.8343		0.2475	-30.0609	-42.2655	-31.3734	12.2045	1.31242
0.2525	-28.561	-16.9083	-23.4665		0.2525	-45.3993	-42.3655	-43.8264		0.2525	-37.1249	-30.6509	-31.8565		0.2525	-28.9083	-42.3655	-30.6509	13.4572	1.74261
0.2575	-28.9875	-18.6545	-25.9457		0.2575	-46.9577	-41.643	-42.8486		0.2575	-33.3677	-32.1192	-33.742		0.2575	-30.6545	-41.643	-32.1192	10.9885	1.46464
0.2625	-29.862	-17.573	-26.153		0.2625	-43.6024	-43.1112	-44.7341		0.2625	-36.8433	-29.7032	-32.3078		0.2625	-29.573	-43.1112	-29.7032	13.5382	0.130232
0.2675	-39.0149	-17.9314	-25.9099		0.2675	-46.5616	-40.6953	-43.2999		0.2675	-34.1601	-30.0827	-33.9212		0.2675	-29.9314	-40.6953	-30.0827	10.7639	0.151277
0.2725	-29.8813	-18.585	-25.2555		0.2725	-44.4442	-41.0748	-44.9133		0.2725	-34.7884	-31.7486	-35.0672		0.2725	-30.585	-41.0748	-31.7486	10.4898	1.16357
0.2775	-30.5439	-18.9467	-25.1053		0.2775	-44.8244	-42.7406	-46.0593		0.2775	-33.7014	-32.42	-34.9645		0.2775	-30.9467	-42.7406	-32.42	11.7939	1.47323
0.2825	-26.0601	-19.2523	-27.818		0.2825	-43.8185	-43.4121	-45.9566		0.2825	-37.2361	-32.5338	-34.7347		0.2825	-31.2523	-43.4121	-32.5338	12.1597	1.28146
0.2875	-22.8176	-17.1835	-27.4946		0.2875	-46.885	-43.5259	-45.7268		0.2875	-38.5142	-33.9723	-36.9621		0.2875	-29.1835	-43.5259	-33.9723	14.3423	4.78878
0.2925	-23.5635	-20.4765	-28.4492		0.2925	-48.0285	-44.9644	-47.9542		0.2925	-39.3392	-32.2043	-36.5159		0.2925	-32.4765	-44.9644	-32.2043	12.4879	0.272186
0.2975	-33.5566	-19.4723	-29.9771		0.2975	-49.0173	-43.1964	-47.508		0.2975	-36.6656	-32.4876	-36.6687		0.2975	-31.4723	-43.1964	-32.4876	11.7241	1.0153
0.3025	-31.2314	-19.1667	-29.133		0.3025	-46.6222	-43.4797	-47.6608		0.3025	-37.1492	-31.3462	-37.6915		0.3025	-31.1667	-43.4797	-31.3462	12.313	0.179514
0.3075	-29.7565	-20.5981	-27.7193		0.3075	-46.9094	-42.3383	-48.6836		0.3075	-36.738	-31.9041	-36.5416		0.3075	-32.5981	-42.3383	-31.9041	9.74015	0.694075
0.3125	-34.379	-18.2136	-28.5244		0.3125	-46.5879	-42.8962	-47.5337		0.3125	-37.123	-32.8413	-35.8743		0.3125	-30.2136	-42.8962	-32.8413	12.6826	2.62773
0.3175	-30.3599	-20.2453	-30.269		0.3175	-46.8364	-43.8334	-46.8664		0.3175	-38.3194	-34.2598	-37.3671		0.3175	-32.2453	-43.8334	-34.2598	11.5881	2.01451
0.3225	-33.4954	-19.2819	-28.213		0.3225	-47.8694	-45.2519	-48.3592		0.3225	-40.2125	-33.8884	-37.7811		0.3225	-31.2819	-45.2519	-33.8884	13.97	2.60649
0.3275	-26.477	-19.6526	-29.9956		0.3275	-49.7625	-44.8804	-48.7732		0.3275	-37.1446	-34.1622	-38.9783		0.3275	-31.6526	-44.8804	-34.1622	13.2278	2.50957
0.3325	-27.727	-19.3914	-28.5368		0.3325	-47.1304	-45.1543	-49.9704		0.3325	-36.8864	-33.7747	-38.9875		0.3325	-31.3914	-45.1543	-33.7747	13.7628	2.38329
0.3375	-26.0934	-21.0828	-27.3429		0.3375	-46.8224	-44.7668	-49.9795		0.3375	-39.4456	-35.0812	-40.1873		0.3375	-33.0828	-44.7668	-35.0812	11.6841	1.99842
0.3425	-26.3107	-19.9583	-32.4927		0.3425	-48.9098	-46.0732	-51.1794		0.3425	-39.8823	-35.5519	-39.5307		0.3425	-31.9583	-46.0732	-35.5519	14.1149	3.59358
0.3475	-31.9673	-20.7471	-32.2329		0.3475	-49.3306	-46.544	-50.5228		0.3475	-40.4344	-35.7198	-40.4086		0.3475	-32.7471	-46.544	-35.7198	13.7968	2.97265
0.3525	-25.3937	-21.0836	-29.7243		0.3525	-49.7315	-46.7119	-51.4007		0.3525	-39.0786	-33.6704	-40.3564		0.3525	-33.0836	-46.7119	-33.6704	13.6283	0.586817
0.3575	-27.0022	-21.0869	-30.9739		0.3575	-48.6435	-44.6625	-51.3485		0.3575	-40.5026	-34.9587	-41.5656		0.3575	-33.0869	-44.6625	-34.9587	11.5756	1.87184
0.3625	-28.5583	-20.6411	-32.2949		0.3625	-49.8713	-45.9508	-52.5577		0.3625	-39.24	-35.0225	-43.0222		0.3625	-32.6411	-45.9508	-35.0225	13.3097	2.38145
0.3675	-32.9757	-20.7119	-31.2478		0.3675	-49.0629	-46.0146	-54.0143		0.3675	-42.1316	-36.7781	-40.9853		0.3675	-32.7119	-46.0146	-36.7781	13.3027	4.06617
0.3725	-34.0206	-23.2413	-33.5928		0.3725	-51.3214	-47.7702	-51.9774		0.3725	-40.707	-37.0313	-41.1909		0.3725	-35.2413	-47.7702	-37.0313	12.5289	1.79003
0.3775	-33.0606	-22.9233	-32.438		0.3775	-50.2152	-48.0234	-52.183		0.3775	-41.2738	-35.6175	-42.3779		0.3775	-34.9233	-48.0234	-35.6175	13.1001	0.69422
0.3825	-31.8926	-23.6717	-32.9514		0.3825	-50.594	-46.6096	-53.37		0.3825	-42.1702	-35.257	-41.2496		0.3825	-35.6717	-46.6096	-35.257	10.9379	0.414754
0.3875	-34.7586	-22.1347	-33.2612		0.3875	-51.4231	-46.2491	-52.2417		0.3875	-42.2893	-38.528	-42.4329		0.3875	-34.1347	-46.2491	-38.528	12.1144	4.39326
0.3925	-31.6454	-21.2487	-32.7244		0.3925	-51.6068	-49.5201	-53.425		0.3925	-41.7914	-37.9443	-42.599		0.3925	-33.2487	-49.5201	-37.9443	16.2713	4.69555
0.3975	-32.1846	-22.3804	-33.5981		0.3975	-51.2492	-48.9364	-53.5911		0.3975	-39.9877	-35.3708	-43.2058		0.3975	-34.3804	-48.9364	-35.3708	14.556	0.990419
0.4025	-30.2951	-21.1739	-33.7176		0.4025	-49.7245	-46.3629	-54.1979		0.4025	-39.647	-39.3315	-43.1966		0.4025	-33.1739	-46.3629	-39.3315	13.189	6.15761
0.4075	-34.5522	-23.403	-34.0536		0.4075	-49.6107	-50.3236	-54.1887		0.4075	-41.0653	-37.013	-43.91		0.4075	-35.403	-50.3236	-37.013	14.9206	1.60992
0.4125	-34.9352	-23.0567	-34.4844		0.4125	-50.7349	-48.0051	-54.9021		0.4125	-39.6291	-38.6013	-44.1731		0.4125	-35.0567	-48.0051	-38.6013	12.9484	3.54458
0.4175	-37.7137	-28.129	-34.5002		0.4175	-49.4801	-49.5934	-55.1652		0.4175	-44.0813	-36.8257	-45.1671		0.4175	-40.129	-49.5934	-36.8257	9.46437	3.30329
0.4225	-33.9151	-25.1711	-35.8469		0.4225	-53.4562	-47.8178	-56.1592		0.4225	-42.7834	-39.7956	-44.4821		0.4225	-37.1711	-47.8178	-39.7956	10.6467	2.62451
0.4275	-29.4882	-26.0823	-35.4215		0.4275	-52.3917	-50.7877	-55.4742		0.4275	-41.5098	-37.5978	-45.063		0.4275	-38.0823	-50.7877	-37.5978	12.7054	0.484524
0.4325	-29.7214	-24.5122	-35.7359		0.4325	-51.3151	-48.5899	-56.0551		0.4325	-44.2572	-37.8031	-46.0269		0.4325	-36.5122	-48.5899	-37.8031	12.0777	1.29097
0.4375	-30.2757	-26.6197	-36.2018		0.4375	-53.6586	-48.7953	-57.019		0.4375	-43.2012	-36.9878	-44.0516		0.4375	-38.6197	-48.7953	-36.9878	10.1755	1.63188
0.4425	-33.948	-23.8559	-35.4009		0.4425	-52.8296	-47.9799	-55.0437		0.4425	-42.7123	-38.8798	-46.8618		0.4425	-35.8559	-47.9799	-38.8798	12.124	3.02382
0.4475	-38.7562	-24.7288	-35.0072		0.4475	-52.5356	-49.8718	-57.8539		0.4475	-46.5943	-38.0701	-47.705		0.4475	-36.7288	-49.8718	-38.0701	13.1431	1.34137
0.4525	-35.4168	-25.7222	-37.1608		0.4525	-55.8391	-49.0622	-58.6971		0.4525	-42.4355	-38.755	-46.7955		0.4525	-37.7222	-49.0622	-38.755	11.34	1.03282
0.4575	-33.6496	-25.2338	-38.1126		0.4575	-52.3482	-49.7471	-57.7876		0.4575	-48.3824	-39.334	-48.1656		0.4575	-37.2338	-49.7471	-39.334	12.5133	2.10023
0.4625	-33.7726	-25.6941	-38.4746		0.4625	-57.4523	-50.3261	-59.1577		0.4625	-45.1225	-38.1947	-46.8831		0.4625	-37.6941	-50.3261	-38.1947	12.632	0.500585
0.4675	-31.8655	-27.6526	-35.6181		0.4675	-55.0736	-49.1868	-57.8752		0.4675	-45.6192	-40.1878	-48.1332		0.4675	-39.6526	-49.1868	-40.1878	9.5342	0.535169
0.4725	-39.0691	-27.0513	-38.3636		0.4725	-55.305	-51.1799	-59.1253		0.4725	-45.6464	-39.7582	-48.1956		0.4725	-39.0513	-51.1799	-39.7582	12.1285	0.706896
0.4775	-42.9645	-27.8958	-36.3795		0.4775	-55.385	-50.7504	-59.1877		0.4775	-44.6821	-38.8959	-48.4979		0.4775	-39.8958	-50.7504	-38.8959	10.8546	0.999871
0.4825	-37.9363	-26.8854	-38.0385		0.4825	-54.5053	-49.888	-59.49		0.4825	-45.6964	-38.8833	-49.0181		0.4825	-38.8854	-49.888	-38.8833	11.0026	0.002144
0.4875	-32.9676	-26.89	-39.5316		0.4875	-55.4313	-49.8754	-60.0102		0.4875	-44.0396	-38.8919	-48.1886		0.4875	-38.89	-49.8754	-38.8919	10.9853	0.001825
0.4925	-33.0723	-29.581	-38.6481		0.4925	-53.9689	-49.8839	-59.1807		0.4925	-46.2499	-41.2224	-48.8872		0.4925	-41.581	-49.8839	-41.2224	8.30291	0.358608
0.4975	-35.9943	-27.1888	-38.211		0.4975	-56.1021	-52.2145	-59.8793		0.4975	-46.3195	-42.1878	-49.9502		0.4975	-39.1888	-52.2145	-42.1878	13.0257	2.99897
0.5025	-32.7657	-27.5147	-38.5165		0.5025	-56.0496	-53.1799	-60.9423		0.5025	-44.8782	-39.3162	-49.3481		0.5025	-39.5147	-53.1799	-39.3162	13.6652	0.198402
0.5075	-37.5383	-26.5884	-39.4648		0.5075	-54.8603	-50.3083	-60.3402		0.5075	-46.1973	-41.8233	-48.9191		0.5075	-38.5884	-50.3083	-41.8233	11.72	3.23491
0.5125	-34.4381	-30.197	-39.9761		0.5125	-55.9537	-52.8154	-59.9112		0.5125	-48.2515	-41.6108	-50.7475		0.5125	-42.197	-52.8154	-41.6108	10.6184	0.586254
0.5175	-35.5962	-28.2487	-39.0836		0.5175	-57.8302	-52.6029	-61.7395		0.5175	-47.7887	-39.5254	-50.0428		0.5175	-40.2487	-52.6029	-39.5254	12.3541	0.723377
0.5225	-33.2541	-27.7637	-39.2504		0.5225	-57.4766	-50.5175	-61.0348		0.5225	-46.7879	-38.4773	-51.4322		0.5225	-39.7637	-50.5175	-38.4773	10.7538	1.28632
0.5275	-38.4994	-27.6498	-40.1778		0.5275	-56.5234	-49.4694	-62.4242		0.5275	-47.2953	-41.0349	-49.5794		0.5275	-39.6498	-49.4694	-41.0349	9.8196	1.38509
0.5325	-33.2627	-27.1908	-40.4518		0.5325	-56.799	-52.027	-60.5715		0.5325	-49.2972	-40.0488	-51.0834		0.5325	-39.1908	-52.027	-40.0488	12.8362	0.858
0.5375	-37.0958	-29.6331	-41.7981		0.5375	-58.8546	-51.0409	-62.0755		0.5375	-48.8296	-43.1132	-51.898		0.5375	-41.6331	-51.0409	-43.1132	9.40786	1.48018
0.5425	-38.5138	-29.2758	-41.6749		0.5425	-58.319	-54.1053	-62.8901		0.5425	-47.4569	-40.2853	-50.0236		0.5425	-41.2758	-54.1053	-40.2853	12.8296	0.990477
0.5475	-38.0592	-29.4696	-41.3145		0.5475	-57.1704	-51.2774	-61.0157		0.5475	-48.3709	-40.8435	-51.576		0.5475	-41.4696	-51.2774	-40.8435	9.80779	0.626129
0.5525	-38.7235	-30.4559	-41.1874		0.5525	-57.8499	-51.8356	-62.5681		0.5525	-48.6353	-42.4034	-52.4394		0.5525	-42.4559	-51.8356	-42.4034	9.3797	0.052521
0.5575	-34.6187	-29.3237	-41.352		0.5575	-57.9106	-53.3955	-63.4315		0.5575	-50.5084	-44.0462	-52.8109		0.5575	-41.3237	-53.3955	-44.0462	12.0718	2.72246
0.5625	-39.2778	-31.5871	-42.0496		0.5625	-59.5744	-55.0382	-63.803		0.5625	-52.0472	-43.0665	-51.9315		0.5625	-43.5871	-55.0382	-43.0665	11.4512	0.520604
0.5675	-42.7823	-32.0408	-39.8428		0.5675	-60.9695	-54.0586	-62.9235		0.5675	-48.9969	-42.4374	-53.5852		0.5675	-44.0408	-54.0586	-42.4374	10.0178	1.60341
0.5725	-40.8153	-30.4694	-43.9715		0.5725	-58.5514	-53.4294	-64.5773		0.5725	-49.0211	-44.1332	-52.7283		0.5725	-42.4694	-53.4294	-44.1332	10.96	1.66379
0.5775	-46.3944	-30.466	-44.7618		0.5775	-58.7735	-55.1254	-63.7204		0.5775	-49.1967	-45.0903	-55.1483		0.5775	-42.466	-55.1254	-45.0903	12.6594	2.6243
0.5825	-45.0581	-29.658	-43.6344		0.5825	-58.474	-56.0824	-66.1404		0.5825	-52.5483	-44.7776	-53.2786		0.5825	-41.658	-56.0824	-44.7776	14.4244	3.11961
0.5875	-44.0027	-29.9639	-42.6906		0.5875	-61.8119	-55.7697	-64.2707		0.5875	-48.2984	-42.6457	-53.7781		0.5875	-41.9639	-55.7697	-42.6457	13.8058	0.68174
0.5925	-43.5736	-31.9244	-43.8139		0.5925	-57.9448	-53.6378	-64.7702		0.5925	-51.8954	-43.3665	-53.1425		0.5925	-43.9244	-53.6378	-43.3665	9.71339	0.557869
0.5975	-42.182	-31.3493	-43.0094		0.5975	-61.3356	-54.3586	-64.1346		0.5975	-49.7323	-43.596	-56.116		0.5975	-43.3493	-54.3586	-43.596	11.0093	0.246689
0.6025	-47.3867	-34.097	-42.0119		0.6025	-59.2655	-54.5881	-67.1081		0.6025	-49.8108	-46.2892	-55.3041		0.6025	-46.097	-54.5881	-46.2892	8.49106	0.192169
0.6075	-40.1398	-32.1279	-43.9738		0.6075	-59.1422	-57.2813	-66.2962		0.6075	-52.0519	-43.3466	-55.5979		0.6075	-44.1279	-57.2813	-43.3466	13.1534	0.781346
0.6125	-39.06	-34.7573	-43.5453		0.6125	-61.3046	-54.3387	-66.59		0.6125	-53.0289	-45.1478	-54.9323		0.6125	-46.7573	-54.3387	-45.1478	7.58144	1.6095
0.6175	-43.5463	-31.1389	-42.0033		0.6175	-61.9155	-56.1399	-65.9244		0.6175	-51.7709	-46.4727	-56.0656		0.6175	-43.1389	-56.1399	-46.4727	13.001	3.33387
0.6225	-38.9163	-31.2644	-44.6101		0.6225	-60.9641	-57.4648	-67.0577		0.6225	-53.8597	-45.2057	-56.7678		0.6225	-43.2644	-57.4648	-45.2057	14.2004	1.94131
0.6275	-36.3556	-32.6323	-44.6746		0.6275	-62.8378	-56.1978	-67.7599		0.6275	-51.0786	-44.1078	-55.9749		0.6275	-44.6323	-56.1978	-44.1078	11.5656	0.524471
0.6325	-42.2865	-32.1825	-44.9735		0.6325	-60.7315	-55.0999	-66.967		0.6325	-51.0388	-44.3782	-56.2877		0.6325	-44.1825	-55.0999	-44.3782	10.9174	0.195648
0.6375	-47.8108	-32.4345	-46.1946		0.6375	-60.6374	-55.3703	-67.2798		0.6375	-53.0804	-43.6596	-58.4922		0.6375	-44.4345	-55.3703	-43.6596	10.9357	0.774936
0.6425	-55.3798	-30.8747	-46.7948		0.6425	-62.2857	-54.6517	-69.4843		0.6425	-52.1683	-45.7531	-56.3033		0.6425	-42.8747	-54.6517	-45.7531	11.777	2.87836
0.6475	-41.0711	-31.8899	-45.8047		0.6475	-61.8267	-56.7451	-67.2953		0.6475	-51.6498	-46.5699	-57.531		0.6475	-43.8899	-56.7451	-46.5699	12.8553	2.68004
0.6525	-38.6703	-34.7578	-46.8279		0.6525	-61.2631	-57.562	-68.5231		0.6525	-56.3195	-44.6931	-56.0442		0.6525	-46.7578	-57.562	-44.6931	10.8042	2.06471
0.6575	-42.1623	-31.5884	-46.2735		0.6575	-65.4429	-55.6852	-67.0363		0.6575	-52.008	-46.0277	-59.1361		0.6575	-43.5884	-55.6852	-46.0277	12.0969	2.43932
0.6625	-46.4531	-34.2986	-45.0231		0.6625	-61.8892	-57.0198	-70.1282		0.6625	-52.9212	-46.4705	-59.0135		0.6625	-46.2986	-57.0198	-46.4705	10.7211	0.171806
0.6675	-39.0874	-33.2981	-44.479		0.6675	-62.6157	-57.4625	-70.0056		0.6675	-54.2146	-45.7706	-60.5212		0.6675	-45.2981	-57.4625	-45.7706	12.1644	0.472473
0.6725	-38.2415	-32.9601	-45.5787		0.6725	-63.8145	-56.7627	-71.5133		0.6725	-52.5206	-45.6132	-57.6322		0.6725	-44.9601	-56.7627	-45.6132	11.8026	0.653145
0.6775	-40.4555	-34.7888	-45.1753		0.6775	-62.3995	-56.6054	-68.6243		0.6775	-55.4246	-45.4011	-59.6335		0.6775	-46.7888	-56.6054	-45.4011	9.81658	1.38763
0.6825	-45.2438	-34.6955	-46.581		0.6825	-65.0544	-56.3932	-70.6256		0.6825	-58.1841	-44.0631	-58.1198		0.6825	-46.6955	-56.3932	-44.0631	9.69772	2.63242
0.6875	-45.112	-35.7521	-45.9931		0.6875	-67.4315	-55.0552	-69.1119		0.6875	-54.0783	-46.5403	-60.5984		0.6875	-47.7521	-55.0552	-46.5403	7.30307	1.21186
0.6925	-49.56	-35.1381	-45.938		0.6925	-64.1901	-57.5324	-71.5905		0.6925	-56.5062	-47.825	-58.9697		0.6925	-47.1381	-57.5324	-47.825	10.3942	0.686863
0.6975	-40.9313	-35.7462	-48.2367		0.6975	-66.2462	-58.8171	-69.9618		0.6975	-54.4884	-47.1084	-60.1642		0.6975	-47.7462	-58.8171	-47.1084	11.0709	0.637882
0.7025	-37.9796	-33.8122	-46.8038		0.7025	-64.7027	-58.1005	-71.1563		0.7025	-54.8389	-48.2198	-62.0206		0.7025	-45.8122	-58.1005	-48.2198	12.2883	2.4076
0.7075	-40.3928	-35.2424	-48.4776		0.7075	-64.8334	-59.2119	-73.0127		0.7075	-55.306	-46.3981	-59.042		0.7075	-47.2424	-59.2119	-46.3981	11.9695	0.844375
0.7125	-38.5448	-36.7659	-49.3492		0.7125	-65.3712	-57.3902	-70.0341		0.7125	-55.0852	-48.4718	-59.7226		0.7125	-48.7659	-57.3902	-48.4718	8.62428	0.294079
0.7175	-43.9453	-35.3059	-48.3446		0.7175	-65.101	-59.4639	-70.7147		0.7175	-54.8585	-47.9411	-60.3371		0.7175	-47.3059	-59.4639	-47.9411	12.158	0.635243
0.7225	-41.3807	-34.9149	-48.347		0.7225	-64.9713	-58.9332	-71.3292		0.7225	-56.3922	-48.9991	-60.2838		0.7225	-46.9149	-58.9332	-48.9991	12.0183	2.0842
0.7275	-39.5731	-36.6678	-48.53		0.7275	-66.4961	-59.9912	-71.2759		0.7275	-54.7452	-48.3159	-61.1211		0.7275	-48.6678	-59.9912	-48.3159	11.3234	0.35191
0.7325	-46.2058	-35.8139	-48.3454		0.7325	-64.9078	-59.3081	-72.1132		0.7325	-53.8845	-50.0494	-65.1642		0.7325	-47.8139	-59.3081	-50.0494	11.4941	2.23548
0.7375	-39.1615	-37.0315	-48.8347		0.7375	-64.1879	-61.0415	-76.1563		0.7375	-61.7032	-51.1808	-65.4751		0.7375	-49.0315	-61.0415	-51.1808	12.01	2.14933
0.7425	-40.5092	-36.0034	-47.8472		0.7425	-71.4066	-62.1729	-76.4672		0.7425	-55.8749	-49.5979	-63.3781		0.7425	-48.0034	-62.1729	-49.5979	14.1695	1.59446
0.7475	-48.0618	-36.6949	-48.8054		0.7475	-66.2277	-60.59	-74.3703		0.7475	-56.6238	-48.468	-63.599		0.7475	-48.6949	-60.59	-48.468	11.895	0.226978
0.7525	-49.1373	-37.4191	-49.0102		0.7525	-66.7271	-59.4601	-74.5911		0.7525	-58.3384	-46.8767	-63.2738		0.7525	-49.4191	-59.4601	-46.8767	10.041	2.54236
0.7575	-52.5763	-37.7817	-48.3914		0.7575	-68.1491	-57.8688	-74.2659		0.7575	-57.0045	-50.4181	-62.3446		0.7575	-49.7817	-57.8688	-50.4181	8.08707	0.636322
0.7625	-54.6634	-37.6194	-49.0733		0.7625	-67.2452	-61.4102	-73.3367		0.7625	-56.5585	-51.3966	-63.8067		0.7625	-49.6194	-61.4102	-51.3966	11.7907	1.77719
0.7675	-52.2965	-40.2721	-50.5756		0.7675	-66.5638	-62.3887	-74.7988		0.7675	-56.0575	-49.3345	-62.8964		0.7675	-52.2721	-62.3887	-49.3345	10.1167	2.9376
0.7725	-42.106	-38.6155	-49.3425		0.7725	-66.0789	-60.3266	-73.8885		0.7725	-59.2738	-48.7425	-63.2133		0.7725	-50.6155	-60.3266	-48.7425	9.71108	1.873
0.7775	-41.6743	-34.6285	-49.0661		0.7775	-68.9517	-59.7346	-74.2054		0.7775	-57.6224	-52.0384	-63.1036		0.7775	-46.6285	-59.7346	-52.0384	13.106	5.40984
0.7825	-47.0521	-35.2792	-49.1957		0.7825	-67.4664	-63.0305	-74.0957		0.7825	-59.3098	-48.9081	-63.0591		0.7825	-47.2792	-63.0305	-48.9081	15.7513	1.62885
0.7875	-49.7947	-36.7897	-49.6812		0.7875	-68.8732	-59.9001	-74.0512		0.7875	-56.7284	-52.445	-66.474		0.7875	-48.7897	-59.9001	-52.445	11.1104	3.65531
0.7925	-45.2809	-39.7198	-50.0241		0.7925	-66.6666	-63.4371	-77.4661		0.7925	-55.4475	-50.6471	-63.8362		0.7925	-51.7198	-63.4371	-50.6471	11.7173	1.07267
0.7975	-51.478	-38.0702	-50.4198		0.7975	-65.4128	-61.6392	-74.8283		0.7975	-61.3829	-51.9428	-65.8748		0.7975	-50.0702	-61.6392	-51.9428	11.569	1.87263
0.8025	-44.3054	-39.334	-50.1292		0.8025	-70.367	-62.9349	-76.8669		0.8025	-59.5606	-52.9289	-65.373		0.8025	-51.334	-62.9349	-52.9289	11.6009	1.59487
0.8075	-43.7169	-36.7936	-50.6421		0.8075	-69.4558	-63.921	-76.3651		0.8075	-58.9086	-50.9173	-62.296		0.8075	-48.7936	-63.921	-50.9173	15.1274	2.12365
0.8125	-41.7699	-37.4605	-50.398		0.8125	-68.4299	-61.9094	-73.2881		0.8125	-58.9286	-49.668	-63.1135		0.8125	-49.4605	-61.9094	-49.668	12.4488	0.207481
0.8175	-44.7352	-39.8233	-49.9046		0.8175	-68.3929	-60.6601	-74.1056		0.8175	-61.4819	-53.3853	-65.2441		0.8175	-51.8233	-60.6601	-53.3853	8.83677	1.56196
0.8225	-45.4213	-39.268	-50.5672		0.8225	-71.111	-64.3774	-76.2362		0.8225	-59.3711	-52.4393	-66.2533		0.8225	-51.268	-64.3774	-52.4393	13.1094	1.17131
0.8275	-46.1673	-38.4137	-51.0483		0.8275	-68.7496	-63.4314	-77.2454		0.8275	-65.5193	-54.2777	-67.2529		0.8275	-50.4137	-63.4314	-54.2777	13.0177	3.86396
0.8325	-44.9709	-38.4081	-50.2687		0.8325	-73.6244	-65.2698	-78.245		0.8325	-59.8658	-51.882	-68.6775		0.8325	-50.4081	-65.2698	-51.882	14.8617	1.47385
0.8375	-47.2016	-38.6693	-49.9739		0.8375	-69.4993	-62.8741	-79.6696		0.8375	-61.1254	-52.873	-63.7848		0.8375	-50.6693	-62.8741	-52.873	12.2048	2.20369
0.8425	-46.6097	-41.4949	-51.3885		0.8425	-70.5821	-63.8651	-74.7769		0.8425	-58.7277	-52.5072	-65.3584		0.8425	-53.4949	-63.8651	-52.5072	10.3701	0.987781
0.8475	-48.8655	-40.9513	-50.4587		0.8475	-68.5699	-63.4993	-76.3505		0.8475	-65.9014	-52.4857	-67.9555		0.8475	-52.9513	-63.4993	-52.4857	10.548	0.465633
0.8525	-43.5639	-37.6296	-50.6719		0.8525	-74.3148	-63.4778	-78.9476		0.8525	-62.342	-52.2405	-66.7273		0.8525	-49.6296	-63.4778	-52.2405	13.8481	2.61089
0.8575	-46.8625	-41.142	-50.0082		0.8575	-71.6512	-63.2326	-77.7194		0.8575	-62.9184	-56.4454	-67.2845		0.8575	-53.142	-63.2326	-56.4454	10.0906	3.30345
0.8625	-44.793	-37.9214	-50.6078		0.8625	-72.3049	-67.4375	-78.2766		0.8625	-66.2888	-54.0858	-67.7498		0.8625	-49.9214	-67.4375	-54.0858	17.5161	4.1644
0.8675	-44.3622	-39.9216	-51.5772		0.8675	-75.8624	-65.0779	-78.7419		0.8675	-63.1512	-54.8985	-67.8744		0.8675	-51.9216	-65.0779	-54.8985	13.1563	2.97688
0.8725	-41.4235	-43.1724	-50.4397		0.8725	-72.6175	-65.8906	-78.8664		0.8725	-64.5331	-53.91	-66.7507		0.8725	-55.1724	-65.8906	-53.91	10.7182	1.26235
0.8775	-49.1414	-39.2283	-50.5839		0.8775	-74.0141	-64.9022	-77.7428		0.8775	-64.2009	-53.5127	-67.73		0.8775	-51.2283	-64.9022	-53.5127	13.6739	2.28444
0.8825	-44.9203	-39.8204	-51.1174		0.8825	-73.6092	-64.5048	-78.7221		0.8825	-62.3943	-54.5196	-66.2238		0.8825	-51.8204	-64.5048	-54.5196	12.6844	2.69927
0.8875	-40.3365	-40.6757	-51.1999		0.8875	-72.4673	-65.5117	-77.2159		0.8875	-65.7389	-54.6685	-65.5632		0.8875	-52.6757	-65.5117	-54.6685	12.836	1.99273
0.8925	-43.461	-41.0499	-51.5205		0.8925	-76.053	-65.6606	-76.5553		0.8925	-63.797	-50.1779	-63.3091		0.8925	-53.0499	-65.6606	-50.1779	12.6107	2.87201
0.8975	-43.5952	-44.0107	-51.3474		0.8975	-73.9032	-61.17	-74.3012		0.8975	-62.4758	-54.7569	-67.5148		0.8975	-56.0107	-61.17	-54.7569	5.15925	1.25385
0.9025	-48.4364	-40.0053	-51.1332		0.9025	-72.728	-65.749	-78.5069		0.9025	-64.1545	-54.4062	-70.115		0.9025	-52.0053	-65.749	-54.4062	13.7436	2.40086
0.9075	-48.4482	-41.9033	-51.5766		0.9075	-74.1997	-65.3983	-81.1071		0.9075	-65.2473	-57.3322	-67.5997		0.9075	-53.9033	-65.3983	-57.3322	11.495	3.42887
0.9125	-52.4247	-42.0404	-51.0318		0.9125	-75.377	-68.3243	-78.5918		0.9125	-66.0211	-53.8168	-67.5067		0.9125	-54.0404	-68.3243	-53.8168	14.2839	0.223575
0.9175	-48.642	-38.7004	-50.3613		0.9175	-75.9962	-64.8089	-78.4988		0.9175	-63.3677	-55.4435	-69.0889		0.9175	-50.7004	-64.8089	-55.4435	14.1085	4.74308
0.9225	-46.1717	-42.0197	-51.4075		0.9225	-73.9484	-66.4356	-80.081		0.9225	-62.2716	-56.1001	-70.6285		0.9225	-54.0197	-66.4356	-56.1001	12.4159	2.0804
0.9275	-48.6072	-44.2327	-50.1765		0.9275	-72.7113	-67.0922	-81.6206		0.9275	-64.5952	-56.9346	-69.8227		0.9275	-56.2327	-67.0922	-56.9346	10.8595	0.701927
0.9325	-46.8746	-40.3973	-51.6216		0.9325	-74.9916	-67.9267	-80.8148		0.9325	-67.222	-56.7786	-69.9113		0.9325	-52.3973	-67.9267	-56.7786	15.5295	4.38137
0.9375	-44.9611	-42.1983	-51.782		0.9375	-77.4389	-67.7708	-80.9034		0.9375	-63.2222	-56.5482	-69.188		0.9375	-54.1983	-67.7708	-56.5482	13.5725	2.34996
0.9425	-48.7251	-39.3578	-51.49		0.9425	-73.7004	-67.5403	-80.1801		0.9425	-68.4679	-57.4479	-70.2077		0.9425	-51.3578	-67.5403	-57.4479	16.1825	6.09012
0.9475	-47.5556	-41.84	-51.4052		0.9475	-78.628	-68.44	-81.1999		0.9475	-66.0753	-57.1054	-69.2689		0.9475	-53.84	-68.44	-57.1054	14.6	3.26539
0.9525	-47.515	-41.6014	-51.0633		0.9525	-76.2605	-68.0975	-80.261		0.9525	-73.9963	-57.4861	-70.7852		0.9525	-53.6014	-68.0975	-57.4861	14.4961	3.88469
0.9575	-39.6648	-41.6075	-51.0059		0.9575	-83.7612	-68.4782	-81.7773		0.9575	-69.2205	-54.7557	-68.2048		0.9575	-53.6075	-68.4782	-54.7557	14.8706	1.14818
0.9625	-43.22	-39.6324	-50.545		0.9625	-80.0265	-65.7478	-79.1969		0.9625	-65.3907	-53.8887	-66.8414		0.9625	-51.6324	-65.7478	-53.8887	14.1154	2.25626
0.9675	-47.6304	-39.2551	-50.8129		0.9675	-76.3609	-64.8808	-77.8335		0.9675	-65.7595	-57.2742	-70.3945		0.9675	-51.2551	-64.8808	-57.2742	13.6257	6.01917
0.9725	-43.8729	-40.6663	-50.9855		0.9725	-76.1393	-68.2663	-81.3867		0.9725	-66.4476	-56.7641	-69.4291		0.9725	-52.6663	-68.2663	-56.7641	15.6	4.09785
0.9775	-44.2688	-39.4801	-50.6617		0.9775	-76.6858	-67.7562	-80.4212		0.9775	-70.6056	-57.9258	-68.837		0.9775	-51.4801	-67.7562	-57.9258	16.2761	6.4457
0.9825	-49.1333	-40.6453	-51.2205		0.9825	-80.2729	-68.9179	-79.8291		0.9825	-69.3482	-59.5395	-71.5913		0.9825	-52.6453	-68.9179	-59.5395	16.2726	6.89422
0.9875	-44.8323	-42.8101	-50.7779		0.9875	-79.4313	-70.5316	-82.5834		0.9875	-67.7869	-55.4401	-69.5107		0.9875	-54.8101	-70.5316	-55.4401	15.7215	0.630001
0.9925	-43.0485	-40.9974	-51.1464		0.9925	-78.3507	-66.4322	-80.5028		0.9925	-68.4576	-57.3986	-70.7539		0.9925	-52.9974	-66.4322	-57.3986	13.4348	4.40124
0.9975	-43.8883	-39.9115	-51.1527		0.9975	-78.3158	-68.3907	-81.746		0.9975	-67.766	-58.6482	-71.061		0.9975	-51.9115	-68.3907	-58.6482	16.4792	6.7367
1.0025	-48.7056	-42.7592	-50.673		1.0025	-77.8063	-69.6403	-82.053		1.0025	-69.8215	-59.8814	-74.3302		1.0025	-54.7592	-69.6403	-59.8814	14.8811	5.12221
1.0075	-43.6541	-42.2901	-51.1747		1.0075	-79.7182	-70.8735	-85.3223		1.0075	-68.7829	-57.7193	-73.4494		1.0075	-54.2901	-70.8735	-57.7193	16.5835	3.42924
1.0125	-44.6317	-42.4285	-51.3918		1.0125	-78.241	-68.7114	-84.4414		1.0125	-67.437	-57.9016	-72.4498		1.0125	-54.4285	-68.7114	-57.9016	14.2829	3.47311
1.0175	-52.1074	-41.4748	-51.5061		1.0175	-77.5506	-68.8937	-83.4419		1.0175	-70.6338	-57.3085	-70.8688		1.0175	-53.4748	-68.8937	-57.3085	15.4189	3.83371
1.0225	-45.8727	-43.1817	-50.6245		1.0225	-80.1079	-68.3006	-81.8609		1.0225	-71.0303	-58.5638	-71.6668		1.0225	-55.1817	-68.3006	-58.5638	13.1189	3.3821
1.0275	-46.8305	-42.1307	-52.1035		1.0275	-80.1073	-69.5559	-82.6589		1.0275	-69.5355	-58.77	-70.1716		1.0275	-54.1307	-69.5559	-58.77	15.4252	4.63934
1.0325	-45.0805	-43.3018	-51.7728		1.0325	-79.4459	-69.7621	-81.1637		1.0325	-70.9941	-58.7456	-71.7487		1.0325	-55.3018	-69.7621	-58.7456	14.4603	3.44381
1.0375	-379.298	-379.298	-379.298		1.0375	-80.3768	-69.7377	-82.7408		1.0375	-72.5165	-58.6975	-74.7543		1.0375	-391.298	-69.7377	-58.6975	321.56	332.6
1.0425	-379.298	-379.298	-379.298		1.0425	-81.3676	-69.6896	-85.7464		1.0425	-70.6239	-61.2807	-74.9236		1.0425	-391.298	-69.6896	-61.2807	321.608	330.017
1.0475	-379.298	-379.298	-379.298		1.0475	-79.7388	-72.2728	-85.9157		1.0475	-72.4	-61.6186	-70.8059		1.0475	-391.298	-72.2728	-61.6186	319.025	329.679
1.0525	-379.298	-379.298	-379.298		1.0525	-81.0848	-72.6107	-81.798		1.0525	-71.1308	-59.7877	-71.9415		1.0525	-391.298	-72.6107	-59.7877	318.687	331.51
1.0575	-379.298	-379.298	-379.298		1.0575	-80.6102	-70.7798	-82.9336		1.0575	-71.0093	-61.8451	-73.103		1.0575	-391.298	-70.7798	-61.8451	320.518	329.453
1.0625	-379.298	-379.298	-379.298		1.0625	-80.3951	-72.8372	-84.0951		1.0625	-71.3683	-60.9345	-74.7209		1.0625	-391.298	-72.8372	-60.9345	318.461	330.363
1.0675	-379.298	-379.298	-379.298		1.0675	-80.415	-71.9266	-85.713		1.0675	-73.0854	-63.0246	-75.8669		1.0675	-391.298	-71.9266	-63.0246	319.371	328.273
1.0725	-379.298	-379.298	-379.298		1.0725	-81.693	-74.0167	-86.8589		1.0725	-75.5453	-60.6009	-73.9142		1.0725	-391.298	-74.0167	-60.6009	317.281	330.697
1.0775	-379.298	-379.298	-379.298		1.0775	-84.3296	-71.593	-84.9063		1.0775	-71.8344	-61.3032	-73.7385		1.0775	-391.298	-71.593	-61.3032	319.705	329.995
1.0825	-379.298	-379.298	-379.298		1.0825	-81.0967	-72.2953	-84.7306		1.0825	-71.3307	-60.5422	-73.9578		1.0825	-391.298	-72.2953	-60.5422	319.002	330.756
1.0875	-379.298	-379.298	-379.298		1.0875	-80.5685	-71.5343	-84.9499		1.0875	-72.2258	-62.6274	-77.363		1.0875	-391.298	-71.5343	-62.6274	319.764	328.67
1.0925	-379.298	-379.298	-379.298		1.0925	-81.5498	-73.6195	-88.3551		1.0925	-74.4477	-61.0239	-74.9455		1.0925	-391.298	-73.6195	-61.0239	317.678	330.274
1.0975	-379.298	-379.298	-379.298		1.0975	-83.8473	-72.0159	-85.9376		1.0975	-73.6836	-61.6814	-77.9332		1.0975	-391.298	-72.0159	-61.6814	319.282	329.616
1.1025	-379.298	-379.298	-379.298		1.1025	-83.3036	-72.6735	-88.9253		1.1025	-70.5694	-61.2017	-74.1387		1.1025	-391.298	-72.6735	-61.2017	318.624	330.096
1.1075	-379.298	-379.298	-379.298		1.1075	-80.8292	-72.1938	-85.1308		1.1075	-72.0332	-64.489	-79.1109		1.1075	-391.298	-72.1938	-64.489	319.104	326.809
1.1125	-379.298	-379.298	-379.298		1.1125	-81.8744	-75.4811	-90.1029		1.1125	-75.7097	-53.7811	-66.6543		1.1125	-391.298	-75.4811	-53.7811	315.817	337.517
1.1175	-379.298	-379.298	-379.298		1.1175	-85.1373	-64.7732	-77.6464		1.1175	-74.7666	-60.2385	-74.5784		1.1175	-391.298	-64.7732	-60.2385	326.525	331.059
1.1225	-379.298	-379.298	-379.298		1.1225	-84.5935	-71.2305	-85.5705		1.1225	-74.77	-60.2259	-74.3959		1.1225	-391.298	-71.2305	-60.2259	320.067	331.072
1.1275	-379.298	-379.298	-379.298		1.1275	-84.8508	-71.218	-85.388		1.1275	-74.2276	-61.9336	-76.8262		1.1275	-391.298	-71.218	-61.9336	320.08	329.364
1.1325	-379.298	-379.298	-379.298		1.1325	-84.5621	-72.9257	-87.8184		1.1325	-76.9714	-58.5321	-71.7418		1.1325	-391.298	-72.9257	-58.5321	318.372	332.766
1.1375	-379.298	-379.298	-379.298		1.1375	-87.1539	-69.5242	-82.7339		1.1375	-74.4356	-59.5099	-78.1922		1.1375	-391.298	-69.5242	-59.5099	321.774	331.788
1.1425	-379.298	-379.298	-379.298		1.1425	-84.9565	-70.502	-89.1843		1.1425	-73.4048	-60.4953	-73.815		1.1425	-391.298	-70.502	-60.4953	320.796	330.802
1.1475	-379.298	-379.298	-379.298		1.1475	-84.1689	-71.4874	-84.8071		1.1475	-75.1297	-64.8896	-76.5442		1.1475	-391.298	-71.4874	-64.8896	319.81	326.408
1.1525	-379.298	-379.298	-379.298		1.1525	-85.9401	-75.8817	-87.5363		1.1525	-75.3407	-62.4739	-77.0172		1.1525	-391.298	-75.8817	-62.4739	315.416	328.824
1.1575	-379.298	-379.298	-379.298		1.1575	-86.2087	-73.466	-88.0094		1.1575	-77.3269	-63.5143	-76.2296		1.1575	-391.298	-73.466	-63.5143	317.832	327.783
1.1625	-379.298	-379.298	-379.298		1.1625	-88.4464	-74.5064	-87.2217		1.1625	-73.1455	-64.0428	-77.1586		1.1625	-391.298	-74.5064	-64.0428	316.791	327.255
1.1675	-379.298	-379.298	-379.298		1.1675	-84.311	-75.0349	-88.1506		1.1675	-73.5688	-65.2051	-80.9867		1.1675	-391.298	-75.0349	-65.2051	316.263	326.093
1.1725	-379.298	-379.298	-379.298		1.1725	-84.4943	-76.1972	-91.9789		1.1725	-77.7025	-65.0554	-78.5479		1.1725	-391.298	-76.1972	-65.0554	315.101	326.242
1.1775	-379.298	-379.298	-379.298		1.1775	-89.0606	-76.0475	-89.5401		1.1775	-75.7598	-64.3436	-77.6513		1.1775	-391.298	-76.0475	-64.3436	315.25	326.954
1.1825	-379.298	-379.298	-379.298		1.1825	-87.0091	-75.3357	-88.6434		1.1825	-77.6138	-65.9957	-77.6034		1.1825	-391.298	-75.3357	-65.9957	315.962	325.302
1.1875	-379.298	-379.298	-379.298		1.1875	-88.6165	-76.9878	-88.5955		1.1875	-77.5853	-69.1642	-82.4014		1.1875	-391.298	-76.9878	-69.1642	314.31	322.134
1.1925	-379.298	-379.298	-379.298		1.1925	-89.0228	-80.1563	-93.3936		1.1925	-77.631	-63.9249	-77.1154		1.1925	-391.298	-80.1563	-63.9249	311.142	327.373
1.1975	-379.298	-379.298	-379.298		1.1975	-88.8286	-74.917	-88.1075		1.1975	-76.6389	-64.4758	-77.5313		1.1975	-391.298	-74.917	-64.4758	316.381	326.822
1.2025	-379.298	-379.298	-379.298		1.2025	-87.696	-75.468	-88.5233		1.2025	-76.0703	-63.8747	-79.1349		1.2025	-391.298	-75.468	-63.8747	315.83	327.423
1.2075	-379.298	-379.298	-379.298		1.2075	-86.8984	-74.8668	-90.127		1.2075	-74.6133	-64.8562	-79.4693		1.2075	-391.298	-74.8668	-64.8562	316.431	326.442
1.2125	-379.298	-379.298	-379.298		1.2125	-85.4684	-75.8483	-90.4615		1.2125	-77.7895	-68.4177	-82.5481		1.2125	-391.298	-75.8483	-68.4177	315.449	322.88
1.2175	-379.298	-379.298	-379.298		1.2175	-88.0958	-79.4098	-93.5401		1.2175	-78.477	-65.307	-76.5644		1.2175	-391.298	-79.4098	-65.307	311.888	325.991
1.2225	-379.298	-379.298	-379.298		1.2225	-88.9348	-76.2991	-87.5564		1.2225	-80.3352	-66.9922	-82.2941		1.2225	-391.298	-76.2991	-66.9922	314.999	324.306
1.2275	-379.298	-379.298	-379.298		1.2275	-89.6911	-77.9843	-93.2861		1.2275	-83.5867	-65.7542	-80.024		1.2275	-391.298	-77.9843	-65.7542	313.313	325.544
1.2325	-379.298	-379.298	-379.298		1.2325	-93.7508	-76.7463	-91.0161		1.2325	-79.8089	-70.4778	-84.8317		1.2325	-391.298	-76.7463	-70.4778	314.552	320.82
1.2375	-379.298	-379.298	-379.298		1.2375	-89.8446	-81.4699	-95.8238		1.2375	-76.9874	-69.456	-85.2184		1.2375	-391.298	-81.4699	-69.456	309.828	321.842
1.2425	-379.298	-379.298	-379.298		1.2425	-87.8597	-80.4481	-96.2106		1.2425	-81.0238	-67.5773	-79.8092		1.2425	-391.298	-80.4481	-67.5773	310.85	323.72
1.2475	-379.298	-379.298	-379.298		1.2475	-90.4049	-78.5694	-90.8013		1.2475	-80.0195	-69.528	-81.8299		1.2475	-391.298	-78.5694	-69.528	312.728	321.77
					1.2525	-89.0604	-80.5201	-92.822		1.2525	-81.7487	-63.5368	-76.8507
					1.2575	-90.8917	-74.529	-87.8428		1.2575	-79.731	-66.398	-77.5221
					1.2625	-89.637	-77.3901	-88.5143		1.2625	-80.9495	-71.65	-85.2067
					1.2675	-89.6571	-82.6421	-96.1988		1.2675	-81.5439	-68.9675	-83.0752
					1.2725	-90.1966	-79.9596	-94.0672		1.2725	-83.1974	-68.2918	-78.7658
					1.2775	-91.3753	-79.2839	-89.7579		1.2775	-81.8156	-70.1459	-83.5802
					1.2825	-91.4187	-81.138	-94.5721		1.2825	-82.063	-67.6352	-81.1447
					1.2875	-90.5264	-78.6274	-92.1368		1.2875	-84.4821	-68.2809	-84.5499
					1.2925	-92.2633	-79.2731	-95.5419		1.2925	-79.4929	-70.5533	-82.7105
					1.2975	-88.9283	-81.5453	-93.7027		1.2975	-81.1678	-72.096	-84.4078
					1.3025	-90.0524	-83.0881	-95.4		1.3025	-82.0796	-67.5917	-82.4677
					1.3075	-90.9908	-78.5838	-93.4597		1.3075	-83.4338	-72.345	-84.5711
					1.3125	-91.9491	-83.3371	-95.5631		1.3125	-81.0985	-68.7807	-84.3602
					1.3175	-90.8065	-79.7728	-95.3523		1.3175	-84.7322	-69.6378	-82.6641
					1.3225	-93.5752	-80.6299	-93.6562		1.3225	-83.9632	-69.9094	-80.2474
					1.3275	-93.7401	-80.9015	-91.2394		1.3275	-88.8746	-63.5591	-77.0319
					1.3325	-98.0661	-74.5512	-88.0241		1.3325	-81.5868	-69.3339	-85.3155
					1.3375	-91.5037	-80.3261	-96.3076		1.3375	-85.6452	-70.826	-86.4854
					1.3425	-95.5418	-81.8181	-97.4775		1.3425	-85.1429	-72.483	-85.5469
					1.3475	-95.099	-83.4751	-96.5389		1.3475	-87.0309	-74.6945	-87.9585
					1.3525	-97.0641	-85.6866	-98.9503		1.3525	-81.1252	-75.4755	-88.1001
					1.3575	-91.5346	-86.4676	-99.0924		1.3575	-80.7179	-63.0768	-77.3148
					1.3625	-91.4131	-74.0689	-88.3068		1.3625	-82.0751	-68.2341	-81.7617
					1.3675	-93.1107	-79.2262	-92.7538		1.3675	-85.7576	-70.1675	-88.2535
					1.3725	-96.8562	-81.1597	-99.2454		1.3725	-78.1502	-77.5186	-92.7503
					1.3775	-89.3214	-88.5107	-103.742		1.3775	-84.8085	-78.0223	-92.0253
					1.3825	-96.4106	-89.0144	-103.017		1.3825	-85.6867	-77.9194	-90.4814
					1.3875	-97.3983	-88.9115	-101.473		1.3875	-83.582	-75.5279	-85.3057
					1.3925	-95.2937	-86.52	-96.2978		1.3925	-85.2778	-70.3449	-83.7618
					1.3975	-97.2409	-81.337	-94.7541		1.3975	-85.2592	-69.5522	-83.908
					1.4025	-96.999	-80.5443	-94.9001		1.4025	-82.95	-67.3621	-80.4517
					1.4075	-94.3303	-78.3542	-91.4439		1.4075	-86.288	-75.8997	-90.5547
					1.4125	-97.8786	-86.8917	-101.547		1.4125	-85.0442	-62.729	-74.9881
					1.4175	-96.9024	-73.7211	-85.9802		1.4175	-83.2032	-73.7627	-86.7214
					1.4225	-94.4198	-84.7548	-97.7135		1.4225	-84.2295	-71.9014	-84.6892
					1.4275	-95.6453	-82.8934	-95.6813		1.4275	-86.7448	-76.0118	-90.5654
					1.4325	-97.9956	-87.0039	-101.558		1.4325	-87.3013	-72.8497	-86.2797
					1.4375	-98.9084	-83.8418	-97.2716		1.4375	-87.4274	-77.476	-93.0927
					1.4425	-98.087	-88.4681	-104.084		1.4425	-88.8074	-77.7494	-91.88
					1.4475	-99.3806	-88.7416	-102.872		1.4475	-88.7429	-75.7826	-88.6686
					1.4525	-99.2016	-86.7747	-99.6607		1.4525	-86.3212	-70.7197	-83.1506
					1.4575	-96.887	-81.7118	-94.1428		1.4575	-89.1711	-75.6226	-88.8423
					1.4625	-98.8787	-86.6148	-99.8346		1.4625	-89.2209	-72.8684	-84.3799
					1.4675	-99.5303	-83.8605	-95.3719		1.4675	-87.5937	-80.3573	-93.6923
					1.4725	-97.3354	-91.3494	-104.684		1.4725	-88.7234	-68.6347	-81.5976
					1.4775	-98.1977	-79.6268	-92.5895		1.4775	-92.4496	-78.6463	-92.388
					1.4825	-100.787	-89.6384	-103.38		1.4825	-92.351	-81.2255	-94.0445
					1.4875	-101.511	-92.2176	-105.036		1.4875	-89.6536	-81.0063	-94.5414
					1.4925	-99.241	-91.9984	-105.532		1.4925	-88.9835	-73.487	-87.3894
					1.4975	-98.5179	-84.4791	-98.3814		1.4975	-89.5585	-69.7183	-81.8258
					1.5025	-98.8472	-80.7104	-92.8178		1.5025	-91.3031	-72.1946	-85.5528
					1.5075	-100.356	-83.1867	-96.5448		1.5075	-90.4804	-74.7568	-87.2319
					1.5125	-99.5618	-85.7489	-98.2238		1.5125	-91.4001	-84.9246	-97.3856
					1.5175	-100.467	-95.9168	-108.378		1.5175	-91.6053	-82.2632	-95.2422
					1.5225	-100.871	-93.2554	-106.234		1.5225	-92.4608	-81.885	-93.823
					1.5275	-101.577	-92.877	-104.815		1.5275	-93.8034	-77.6493	-93.3158
					1.5325	-102.94	-88.6415	-104.308		1.5325	-93.4639	-77.3202	-89.1561
					1.5375	-102.832	-88.3123	-100.148		1.5375	-91.6164	-82.1152	-95.7633
					1.5425	-101.331	-93.1073	-106.756		1.5425	-91.8041	-78.7566	-90.1026
					1.5475	-101.636	-89.7487	-101.095		1.5475	-92.5323	-78.6499	-90.5506
					1.5525	-102.393	-89.642	-101.542		1.5525	-91.6138	-81.5015	-94.6669
					1.5575	-101.723	-92.4935	-105.659		1.5575	-90.5503	-80.4221	-93.9548
					1.5625	-100.826	-91.4143	-104.947		1.5625	-90.5439	-87.8222	-99.1803
					1.5675	-100.714	-98.8141	-110.172		1.5675	-92.945	-80.3845	-95.0441
					1.5725	-102.867	-91.3766	-106.036		1.5725	-95.3006	-81.9332	-96.5433
					1.5775	-104.891	-92.9253	-107.536		1.5775	-93.8293	-83.6957	-99.7599
					1.5825	-103.635	-94.6879	-110.751		1.5825	-93.4722	-89.8678	-102.423
					1.5875	-103.217	-100.86	-113.414		1.5875	-95.5216	-81.9682	-95.4128
					1.5925	-104.714	-92.9603	-106.405		1.5925	-94.6258	-78.4226	-90.4335
					1.5975	-104.16	-89.4147	-101.425		1.5975	-96.0543	-81.8626	-95.5539
					1.6025	-104.938	-92.8547	-106.546		1.6025	-95.6198	-86.5828	-99.7241
					1.6075	-104.802	-97.5749	-110.716		1.6075	-93.9613	-82.0683	-94.5719
					1.6125	-103.43	-93.0604	-105.564		1.6125	-98.9132	-74.3741	-86.8804
					1.6175	-107.322	-85.3661	-97.8725		1.6175	-94.3157	-84.3771	-103.428
					1.6225	-103.448	-95.3693	-114.421		1.6225	-96.8253	-83.5594	-97.0105
					1.6275	-105.332	-94.5514	-108.002		1.6275	-95.1234	-73.4396	-87.7491
					1.6325	-104.37	-84.4317	-98.7411		1.6325	-95.8996	-86.1189	-100.64
					1.6375	-104.747	-97.1108	-111.632		1.6375	-100.276	-90.7841	-103.932
					1.6425	-107.876	-101.776	-114.924		1.6425	-99.1625	-82.2908	-99.1042
					1.6475	-107.215	-93.2829	-110.096		1.6475	-99.2067	-87.4567	-99.3457
					1.6525	-107.277	-98.4487	-110.338		1.6525	-99.463	-85.9475	-99.9427
					1.6575	-108.019	-96.9396	-110.935		1.6575	-99.4491	-83.137	-96.6138
					1.6625	-108.75	-94.129	-107.606		1.6625	-96.8589	-89.2345	-101.798
					1.6675	-106.501	-100.227	-112.79		1.6675	-97.396	-78.2421	-91.4267
					1.6725	-108.51	-89.2343	-102.419		1.6725	-98.2126	-82.1159	-95.8392
					1.6775	-111.06	-93.108	-106.833		1.6775	-103.277	-92.9773	-104.577
					1.6825	-113.895	-103.969	-115.57		1.6825	-98.8945	-91.9802	-109.981
					1.6875	-110.489	-102.972	-120.975		1.6875	-99.9509	-90.8242	-104.938
					1.6925	-112.537	-101.816	-115.93		1.6925	-97.6433	-90.7251	-103.549
					1.6975	-110.84	-101.717	-114.538		1.6975	-98.8694	-92.3789	-106.667
					1.7025	-113.63	-103.371	-117.66		1.7025	-98.3371	-89.1933	-104.497
					1.7075	-115.072	-100.185	-115.489		1.7075	-98.6889	-96.0406	-109.513
					1.7125	-115.078	-107.033	-120.504		1.7125	-97.6032	-89.1425	-103.697
					1.7175	-113.822	-100.135	-114.688		1.7175	-97.2628	-82.2829	-95.361
					1.7225	-115.117	-93.2751	-106.353		1.7225	-97.7894	-92.6408	-106.803
					1.7275	-116.236	-103.633	-117.795		1.7275	-97.7101	-94.1333	-107.81
					1.7325	-118.885	-105.125	-118.799		1.7325	-98.0488	-80.1432	-93.2753
					1.7375	-119.523	-91.1353	-104.268		1.7375	-97.5507	-90.8362	-104.435
					1.7425	-115.192	-101.828	-115.428		1.7425	-96.674	-90.6619	-105.942
					1.7475	-115.231	-101.654	-116.933		1.7475	-96.2176	-85.3484	-98.1192
					1.7525	-112.576	-96.3404	-109.111		1.7525	-97.6367	-98.4731	-113.154
					1.7575	-117.943	-109.465	-124.143		1.7575	-98.0416	-88.9939	-102.511
					1.7625	-115.729	-99.9859	-113.503		1.7625	-97.7768	-102.169	-114.489
					1.7675	-113.552	-113.161	-125.477		1.7675	-98.4476	-94.1021	-106.147
					1.7725	-115.046	-105.094	-117.141		1.7725	-98.6595	-94.7558	-107.269
					1.7775	-114.299	-105.748	-118.261		1.7775	-99.3676	-96.8914	-109.97
					1.7825	-111.632	-107.884	-120.961		1.7825	-100.752	-94.989	-107.151
					1.7875	-112.787	-105.981	-118.144		1.7875	-100.347	-91.8947	-103.183
					1.7925	-112.646	-102.887	-114.176		1.7925	-100.543	-94.0552	-106.576
					1.7975	-111.555	-105.047	-117.567		1.7975	-102.363	-103.06	-114.5
					1.8025	-111.083	-114.052	-125.495		1.8025	-101.47	-106.411	-119.231
					1.8075	-111.478	-117.403	-130.222		1.8075	-102.168	-102.598	-116.354
					1.8125	-110.572	-113.59	-127.347		1.8125	-103.179	-95.8812	-108.239
					1.8175	-110.001	-106.873	-119.231		1.8175	-103.365	-98.3809	-113.723
					1.8225	-110.058	-109.373	-124.714		1.8225	-102.693	-97.6132	-110.971
					1.8275	-110.026	-108.605	-121.962		1.8275	-103.399	-108.796	-121.349
					1.8325	-109.836	-119.788	-132.35		1.8325	-104.137	-108.495	-120.918
					1.8375	-109.178	-119.487	-131.909		1.8375	-104.707	-101.817	-113.336
					1.8425	-109.091	-112.809	-124.325		1.8425	-103.969	-103.482	-117.705
					1.8475	-109.264	-114.473	-128.699		1.8475	-104.585	-98.6408	-111.585
					1.8525	-108.651	-109.633	-122.578		1.8525	-103.2	-98.7423	-112.217
					1.8575	-109.112	-109.734	-123.21		1.8575	-102.629	-102.537	-115.747
					1.8625	-109.249	-113.529	-126.739		1.8625	-102.17	-95.9063	-107.678
					1.8675	-109.142	-106.898	-118.672		1.8675	-101.406	-91.358	-104.275
					1.8725	-109.35	-102.35	-115.267		1.8725	-100.262	-99.9644	-119.75
					1.8775	-109.889	-110.956	-130.735		1.8775	-100.245	-114.915	-129.417
					1.8825	-109.609	-125.905	-140.422		1.8825	-99.5836	-100.474	-111.937
					1.8875	-109.801	-111.466	-122.93		1.8875	-98.9122	-93.5237	-106.235
					1.8925	-110.397	-104.516	-117.226		1.8925	-98.0285	-106.355	-120.937
					1.8975	-110.645	-117.346	-131.927		1.8975	-98.0997	-114.315	-124.877
					1.9025	-111.044	-125.31	-135.856		1.9025	-97.7171	-97.6559	-110.266
					1.9075	-111.017	-108.648	-121.256		1.9075	-97.2947	-98.0154	-111.22
					1.9125	-111.454	-109.008	-122.212		1.9125	-96.9173	-108.284	-120.222
					1.9175	-111.68	-119.276	-131.215		1.9175	-96.6856	-94.8776	-107.913
					1.9225	-112.282	-105.87	-118.906		1.9225	-96.5954	-109.734	-124.417
					1.9275	-112.043	-120.727	-135.406		1.9275	-96.2543	-113.252	-125.324
					1.9325	-112.4	-124.243	-136.317		1.9325	-96.0526	-104.405	-117.059
					1.9375	-112.581	-115.397	-128.049		1.9375	-95.9923	-113.173	-124.658
					1.9425	-112.499	-124.164	-135.649		1.9425	-95.8086	-100.877	-113.765
					1.9475	-112.455	-111.869	-124.756		1.9475	-95.6372	-117.298	-130.586
					1.9525	-112.533	-128.288	-141.561		1.9525	-95.5429	-107.187	-119.915
					1.9575	-112.304	-118.18	-130.909		1.9575	-95.5386	-97.0986	-108.77
					1.9625	-111.976	-108.091	-119.762		1.9625	-95.4709	-90.0864	-103.256
					1.9675	-111.602	-101.079	-114.248		1.9675	-95.2856	-101.873	-116.41
					1.9725	-111.522	-112.866	-127.398		1.9725	-95.5783	-116.145	-131.68
					1.9775	-110.585	-127.138	-142.718		1.9775	-95.4099	-90.7239	-103.771
					1.9825	-110.617	-101.716	-114.763		1.9825	-95.2825	-110.076	-127.293
					1.9875	-110.242	-121.068	-138.3		1.9875	-95.4682	-109.073	-120.892
					1.9925	-109.786	-120.064	-131.88		1.9925	-95.3411	-107.994	-124.124
					1.9975	-109.59	-118.986	-135.121		1.9975	-95.3709	-121.619	-133.88
					2.0025	-109.261	-132.616	-144.908		2.0025	-95.3964	-121.632	-135.582
					2.0075	-108.877	-132.623	-146.521		2.0075	-95.4157	-99.6415	-112.362
					2.0125	-108.612	-110.633	-123.356		2.0125	-95.4281	-113.642	-138.979
					2.0175	-108.27	-124.635	-149.969		2.0175	-95.4173	-132.722	-145.026
					2.0225	-108.075	-143.702	-155.75		2.0225	-95.4209	-108.319	-120.844
					2.0275	-107.782	-119.31	-131.832		2.0275	-95.4445	-126.365	-139.6
					2.0325	-107.559	-137.349	-150.603		2.0325	-95.3972	-110.137	-124.17
					2.0375	-107.347	-121.129	-135.163		2.0375	-95.3724	-102.808	-115.693
					2.0425	-107.196	-113.8	-126.689		2.0425	-95.3085	-111.155	-123.669
					2.0475	-107.002	-122.146	-134.663		2.0475	-95.257	-135.561	-163.08
					2.0525	-106.877	-146.587	-169.42		2.0525	-95.1599	-148.904	-161.998
					2.0575	-106.728	-159.325	-166.649		2.0575	-95.0741	-157.965	-164.669
					2.0625	-106.643	-165.942	-170.304		2.0625	-94.9389	-122.545	-132.981
					2.0675	-106.531	-133.537	-143.945		2.0675	-94.8284	-132.288	-146.018
					2.0725	-106.475	-143.278	-156.762		2.0725	-94.6787	-152.355	-165.208
					2.0775	-106.382	-162.264	-171.204		2.0775	-94.5465	-142.825	-153.759
					2.0825	-106.355	-153.68	-163.954		2.0825	-94.373	-145.095	-161.733
					2.0875	-106.293	-155.93	-170.358		2.0875	-94.2362	-113.615	-126.413
					2.0925	-106.276	-124.608	-137.404		2.0925	-94.0654	-110.509	-122.597
					2.0975	-106.215	-121.498	-133.592		2.0975	-93.8658	-115.893	-136.898
					2.1025	-106.277	-126.885	-147.869		2.1025	-93.7556	-137.811	-164.107
					2.1075	-106.155	-148.696	-168.886		2.1075	-93.5918	-149.583	-166.735
					2.1125	-106.179	-160.157	-171.266		2.1125	-93.4114	-116.13	-126.494
					2.1175	-106.143	-127.126	-137.491		2.1175	-93.2754	-114.809	-131.316
					2.1225	-106.143	-125.797	-142.312		2.1225	-93.1033	-135.517	-163.182
					2.1275	-106.101	-146.526	-169.198		2.1275	-92.9687	-148.731	-164.547
					2.1325	-106.104	-159.167	-170.078		2.1325	-92.8167	-157.162	-166.053
					2.1375	-106.041	-164.745	-172.26		2.1375	-92.7018	-160.124	-165.418
					2.1425	-106.021	-166.233	-166.188		2.1425	-92.5494	-160.807	-162.437
					2.1475	-105.959	-166.647	-169.532		2.1475	-92.4298	-160.503	-165.158
					2.1525	-105.95	-165.889	-169.787		2.1525	-94.7637	-163.53	-168.431
					2.1575	-108.493	-168.994	-175.956		2.1575	-68.26	-69.9179	-68.0056

## Sheet: IR2
Measured					Old					New
Bands	63	1000	16000		Bands	63	1000	16000		Bands	63	1000	16000
RT60	0.665232	0.503969	0.482964		RT60	1.28893	0.563774	0.398348		RT60	1.31243	0.57392	0.396487
EDT	0	0	0		EDT	0	0	0		EDT	0	0	0
DRR	-43.8399	-10.4626	-14.7109		DRR	-19.7564	2.13048	3.01755		DRR	-27.4236	-8.49698	-8.12478
C50	9.92528	5.40006	5.93901		C50	5.17174	9.94025	13.04		C50	4.51612	5.24064	8.66002
C80	16.2176	10.2849	10.2458		C80	8.4052	13.8278	17.701		C80	8.08688	9.55079	13.5413
D50	90.7659	77.6157	79.6977		D50	76.6891	90.7948	95.269		D50	73.8826	76.9715	88.017
TS	0.02589	0.032051	0.032913		TS	0.041923	0.013467	0.008561		TS	0.048552	0.032832	0.021669
Bands	63	1000	16000		Bands	63	1000	16000		Bands	63	1000	16000
0.0025	-24.5212	5.84897	-2.91951		0.0025	-35.6861	-7.9827	-1.5858		0.0025	-21.1666	-9.60987	-0.608456
0.0075	0.390759	7.33418	3.52618		0.0075	-20.5908	-18.3661	-11.833		0.0075	-19.6647	-5.72245	0.698473
0.0125	0.530505	6.88481	2.81016		0.0125	-31.6491	-16.4474	-10.4923		0.0125	-14.3672	-9.84909	-3.11603
0.0175	-2.93905	6.5608	2.31742		0.0175	-26.4826	-19.9563	-14.5968		0.0175	-13.4505	-12.4686	-5.51113
0.0225	-9.01437	3.75221	0.121543		0.0225	-24.6788	-23.3784	-16.4672		0.0225	-13.6009	-11.5396	-5.61816
0.0275	-5.42206	4.49899	0.509504		0.0275	-24.5391	-22.8301	-16.6304		0.0275	-18.5483	-13.2567	-6.86507
0.0325	-4.83294	2.6093	0.400372		0.0325	-29.2855	-23.812	-17.9736		0.0325	-16.8647	-13.1389	-6.69635
0.0375	-9.19288	0.620763	-0.690174		0.0375	-27.5041	-24.0467	-17.6522		0.0375	-17.8073	-12.537	-7.90473
0.0425	-2.24008	0.417036	-2.82648		0.0425	-28.451	-23.8328	-18.7488		0.0425	-18.1807	-12.4678	-8.59418
0.0475	-3.86132	0.308168	-4.22358		0.0475	-28.9884	-23.4008	-19.655		0.0475	-21.6461	-15.3596	-9.25036
0.0525	-8.41099	1.49859	-3.36315		0.0525	-32.4834	-26.6367	-20.081		0.0525	-26.412	-15.3518	-10.2565
0.0575	-15.079	2.3521	-5.38503		0.0575	-36.3448	-26.4018	-21.3465		0.0575	-18.1953	-14.559	-11.5897
0.0625	-12.8285	-0.26743	-5.73814		0.0625	-28.6502	-25.7337	-22.7184		0.0625	-21.3433	-14.7674	-11.9233
0.0675	-11.1042	-1.16121	-4.84569		0.0675	-31.8011	-25.5363	-23.1078		0.0675	-22.7055	-14.977	-12.3494
0.0725	-11.086	-3.34849	-7.05527		0.0725	-33.3876	-25.819	-23.382		0.0725	-24.7007	-16.8152	-13.6878
0.0775	-19.2443	-3.31505	-6.598		0.0775	-34.0799	-27.7596	-24.6711		0.0775	-24.2855	-18.2166	-13.6579
0.0825	-13.1282	-3.21805	-7.36563		0.0825	-33.643	-29.68	-24.467		0.0825	-25.5303	-17.6992	-13.8967
0.0875	-22.7335	-5.22473	-7.13288		0.0875	-34.9446	-28.4365	-25.0096		0.0875	-32.3727	-19.0993	-16.1088
0.0925	-25.6502	-5.3623	-8.342		0.0925	-41.5523	-30.074	-27.2465		0.0925	-24.91	-21.002	-16.5763
0.0975	-25.4743	-7.26731	-10.1517		0.0975	-35.0913	-31.496	-27.283		0.0975	-27.5356	-18.8619	-17.3814
0.1025	-19.653	-6.5161	-9.6883		0.1025	-37.7239	-30.1307	-28.5558		0.1025	-27.0943	-21.6021	-18.2438
0.1075	-15.5775	-5.94307	-11.5307		0.1075	-37.1085	-32.3397	-29.3957		0.1075	-29.374	-23.5828	-18.5673
0.1125	-23.8722	-6.64337	-10.3321		0.1125	-39.4857	-34.3376	-29.5382		0.1125	-27.4519	-21.8382	-19.314
0.1175	-26.8758	-6.30678	-12.7393		0.1175	-37.3432	-33.0257	-30.2778		0.1175	-30.846	-20.9217	-20.319
0.1225	-25.9199	-7.7262	-12.5542		0.1225	-39.9726	-32.1374	-31.2982		0.1225	-28.946	-21.5405	-20.5471
0.1275	-25.5565	-10.1369	-11.6999		0.1275	-39.0783	-33.0323	-31.8101		0.1275	-29.8382	-22.309	-21.5612
0.1325	-27.7982	-10.0008	-13.5735		0.1325	-39.6341	-33.8796	-32.655		0.1325	-29.8203	-24.5252	-21.9411
0.1375	-23.0281	-8.33351	-15.2624		0.1375	-39.5359	-34.8892	-33.2097		0.1375	-30.1629	-25.0969	-23.6417
0.1425	-28.3184	-9.10711	-14.1259		0.1425	-39.7274	-36.48	-34.7331		0.1425	-29.7066	-26.6576	-24.301
0.1475	-33.3023	-10.7093	-15.4688		0.1475	-39.4961	-37.624	-35.5104		0.1475	-29.6186	-26.0063	-25.0736
0.1525	-29.7208	-10.7126	-17.4531		0.1525	-39.3	-36.4851	-35.8372		0.1525	-30.7228	-25.8107	-25.0085
0.1575	-28.4313	-11.5696	-17.0431		0.1575	-40.3783	-36.4692	-36.1328		0.1575	-32.0275	-26.4631	-26.8382
0.1625	-24.4984	-11.1166	-16.8031		0.1625	-40.6709	-37.3807	-37.8758		0.1625	-34.6925	-26.9941	-26.7776
0.1675	-31.9037	-12.6885	-18.3717		0.1675	-43.6003	-38.0643	-37.8874		0.1675	-32.2972	-27.8871	-27.923
0.1725	-37.3384	-16.1413	-18.7247		0.1725	-41.712	-38.6903	-38.9528		0.1725	-33.3168	-26.9401	-28.4482
0.1775	-38.5721	-15.3224	-20.1324		0.1775	-43.732	-38.2149	-39.5559		0.1775	-29.5086	-26.7892	-28.8508
0.1825	-33.4275	-17.5506	-19.9804		0.1825	-39.815	-38.0601	-39.883		0.1825	-29.734	-28.9453	-30.2859
0.1875	-28.7183	-16.6253	-21.4196		0.1875	-39.9037	-40.5633	-40.9655		0.1875	-31.1031	-30.6652	-31.799
0.1925	-33.9497	-18.724	-21.6802		0.1925	-40.5446	-41.817	-42.5514		0.1925	-31.5276	-29.7611	-31.6907
0.1975	-30.3538	-18.3456	-21.4342		0.1975	-40.9484	-40.8165	-42.6166		0.1975	-33.0047	-31.8697	-32.6944
0.2025	-32.3377	-19.7916	-22.6761		0.2025	-42.271	-41.7983	-43.1834		0.2025	-37.8333	-31.1573	-33.518
0.2075	-30.3527	-20.1594	-22.2204		0.2075	-45.9417	-42.0835	-44.5533		0.2075	-38.0917	-32.3364	-33.6165
0.2125	-33.2151	-19.5165	-25.1994		0.2125	-47.2245	-43.1405	-44.6968		0.2125	-37.7809	-31.704	-34.9413
0.2175	-29.2591	-21.1432	-26.5014		0.2175	-48.1712	-43.5033	-45.784		0.2175	-32.0428	-33.1895	-34.8383
0.2225	-32.614	-19.0912	-23.097		0.2225	-42.8454	-43.976	-46.0531		0.2225	-36.1498	-33.7738	-35.5506
0.2275	-29.3418	-20.6934	-25.0505		0.2275	-46.6308	-45.9228	-45.9791		0.2275	-35.3576	-33.8983	-36.4318
0.2325	-30.0286	-23.5801	-25.9178		0.2325	-44.9477	-44.1141	-47.3823		0.2325	-35.2236	-35.2484	-36.9867
0.2375	-36.1459	-21.5138	-27.3717		0.2375	-44.8057	-46.6756	-48.631		0.2375	-32.8136	-34.9213	-37.3977
0.2425	-39.0483	-21.4475	-27.8903		0.2425	-43.1944	-46.6499	-48.9226		0.2425	-35.311	-35.7776	-37.978
0.2475	-35.1388	-22.2712	-28.3714		0.2475	-45.0593	-48.6453	-49.4411		0.2475	-34.8908	-35.8013	-39.669
0.2525	-40.3824	-21.2842	-29.5607		0.2525	-45.4643	-47.1883	-50.3038		0.2525	-36.6858	-38.5224	-39.9439
0.2575	-41.9893	-22.9735	-28.6298		0.2575	-47.3928	-49.3947	-50.1166		0.2575	-32.7079	-37.2117	-40.9659
0.2625	-36.2021	-23.7972	-29.8911		0.2625	-43.8532	-48.9576	-52.1191		0.2625	-36.2587	-37.5931	-40.9811
0.2675	-37.9109	-25.9238	-31.109		0.2675	-46.3165	-47.3937	-51.4345		0.2675	-35.6195	-36.67	-41.8328
0.2725	-35.1301	-25.0246	-32.023		0.2725	-45.1635	-48.5436	-53.0482		0.2725	-35.0093	-40.9566	-42.425
0.2775	-32.2539	-25.6728	-31.7171		0.2775	-44.9193	-51.4289	-53.2106		0.2775	-34.6819	-37.6301	-42.8066
0.2825	-40.9299	-25.4389	-35.6263		0.2825	-44.8174	-49.4931	-54.3729		0.2825	-36.3889	-39.2368	-44.2371
0.2875	-46.5106	-24.4379	-33.1116		0.2875	-46.5932	-50.3185	-55.7144		0.2875	-36.6572	-40.2316	-43.8769
0.2925	-41.6279	-26.6907	-33.2225		0.2925	-46.9835	-51.3073	-56.1621		0.2925	-38.4133	-39.0386	-43.5748
0.2975	-47.0277	-28.3903	-34.25		0.2975	-47.3806	-49.3823	-55.1497		0.2975	-36.8031	-39.8917	-46.0398
0.3025	-42.1487	-28.1923	-34.8496		0.3025	-46.331	-51.7194	-57.6843		0.3025	-37.0425	-39.983	-47.5134
0.3075	-50.7283	-28.5244	-34.3945		0.3075	-46.1409	-50.5202	-57.5866		0.3075	-36.7787	-41.5241	-46.6942
0.3125	-45.4266	-28.5724	-34.7322		0.3125	-46.5499	-51.4365	-58.3374		0.3125	-36.3671	-41.5939	-47.6107
0.3175	-41.7469	-28.9929	-34.1198		0.3175	-45.9575	-53.6657	-58.5477		0.3175	-37.7136	-43.1745	-48.1099
0.3225	-38.3935	-31.7442	-38.9684		0.3225	-47.6007	-54.868	-60.2659		0.3225	-38.4565	-44.4258	-48.3481
0.3275	-45.107	-28.9514	-35.3078		0.3275	-48.2323	-56.7704	-59.6257		0.3275	-38.2458	-43.6028	-49.6338
0.3325	-47.2004	-28.5825	-37.0137		0.3325	-48.4933	-54.5607	-61.4379		0.3325	-38.7889	-44.0403	-49.4296
0.3375	-42.7481	-30.1393	-35.7064		0.3375	-48.2395	-55.5	-60.1674		0.3375	-41.0767	-41.2067	-49.6201
0.3425	-44.2379	-29.4116	-39.826		0.3425	-49.9913	-53.7995	-60.4803		0.3425	-39.673	-46.4237	-51.6758
0.3475	-41.8896	-30.9352	-38.1737		0.3475	-49.2563	-57.0668	-62.3669		0.3475	-39.8607	-46.7117	-51.7257
0.3525	-42.339	-30.1642	-38.1281		0.3525	-49.4086	-57.2485	-62.1076		0.3525	-39.5523	-43.4551	-52.9992
0.3575	-41.3278	-30.3928	-38.8749		0.3575	-49.5856	-54.0335	-62.2244		0.3575	-39.9444	-45.5327	-52.1986
0.3625	-43.5209	-29.9448	-39.0551		0.3625	-49.4993	-57.5861	-63.1657		0.3625	-40.2128	-46.2808	-52.6707
0.3675	-40.3412	-30.225	-37.9517		0.3675	-50.226	-56.3928	-63.0289		0.3675	-41.5081	-45.3763	-50.1155
0.3725	-45.1842	-32.607	-39.2767		0.3725	-50.8965	-57.057	-63.8318		0.3725	-40.8303	-45.2959	-53.1762
0.3775	-44.5318	-34.4337	-40.0769		0.3775	-50.5555	-56.0299	-64.7045		0.3775	-41.6966	-46.9576	-56.7702
0.3825	-45.2505	-33.5823	-42.0773		0.3825	-51.3208	-56.7911	-65.7529		0.3825	-42.5994	-48.1794	-54.0298
0.3875	-46.2759	-32.74	-39.4361		0.3875	-50.8764	-60.7886	-65.4589		0.3875	-41.5475	-48.8304	-55.8312
0.3925	-44.4369	-32.8571	-40.8093		0.3925	-50.711	-60.7766	-65.8113		0.3925	-41.6931	-47.8289	-54.4692
0.3975	-45.789	-33.152	-44.8652		0.3975	-51.2525	-60.3639	-65.6674		0.3975	-41.6974	-48.5518	-55.5042
0.4025	-42.5951	-34.5494	-43.3239		0.4025	-52.2252	-60.4687	-68.009		0.4025	-41.0832	-46.9234	-55.8899
0.4075	-41.7758	-35.8419	-43.0593		0.4075	-51.047	-59.2995	-68.2356		0.4075	-41.6225	-48.4356	-52.8842
0.4125	-42.7944	-33.6344	-42.1213		0.4125	-51.5633	-60.2062	-64.134		0.4125	-41.5147	-50.8996	-59.0316
0.4175	-48.0717	-35.3323	-42.302		0.4175	-51.6899	-61.2262	-68.5847		0.4175	-42.8953	-48.4235	-56.3846
0.4225	-45.2195	-36.6757	-46.2048		0.4225	-52.7879	-60.9761	-70.5131		0.4225	-42.608	-50.719	-59.4317
0.4275	-42.848	-35.2195	-43.8477		0.4275	-52.5431	-64.4091	-70.4209		0.4275	-42.7792	-50.687	-60.3566
0.4325	-41.4451	-33.7179	-45.726		0.4325	-52.9077	-61.2923	-69.8438		0.4325	-43.5202	-47.3665	-55.2888
0.4375	-42.0471	-33.8192	-44.6726		0.4375	-53.0977	-61.7985	-72.4417		0.4375	-43.573	-47.4304	-55.765
0.4425	-49.9136	-36.1788	-44.6153		0.4425	-53.0668	-59.684	-69.0631		0.4425	-42.4995	-50.5907	-61.1474
0.4475	-47.6812	-34.8776	-45.6488		0.4475	-52.8475	-62.5717	-72.7957		0.4475	-44.9731	-50.901	-60.0784
0.4525	-47.2569	-34.7567	-44.6966		0.4525	-54.4987	-61.9134	-70.7757		0.4525	-43.6683	-53.4367	-59.9792
0.4575	-43.4336	-35.6722	-45.9257		0.4575	-53.3185	-63.0229	-70.7118		0.4575	-44.1191	-50.4963	-61.4489
0.4625	-51.7487	-36.1859	-46.3397		0.4625	-53.9395	-61.2008	-69.5111		0.4625	-43.7966	-49.319	-57.6033
0.4675	-48.9799	-35.1762	-46.7736		0.4675	-54.3634	-61.898	-72.7289		0.4675	-45.3914	-50.0727	-60.4861
0.4725	-48.9927	-35.7776	-45.8229		0.4725	-55.0902	-63.1649	-73.9795		0.4725	-44.9779	-51.3635	-60.983
0.4775	-48.5906	-36.4619	-46.3747		0.4775	-54.7376	-62.6109	-68.4541		0.4775	-44.4603	-49.951	-61.4248
0.4825	-52.4424	-36.728	-48.0349		0.4825	-55.0926	-62.8485	-74.7729		0.4825	-45.7783	-50.2921	-59.188
0.4875	-48.1971	-38.7396	-44.895		0.4875	-54.7634	-63.7693	-66.6023		0.4875	-45.5402	-53.3333	-61.4842
0.4925	-47.4823	-38.0155	-45.2949		0.4925	-55.8661	-63.2413	-73.2593		0.4925	-47.1893	-51.8235	-62.7787
0.4975	-46.4995	-38.1748	-46.6276		0.4975	-56.6289	-63.4436	-73.78		0.4975	-46.244	-54.5554	-65.3438
0.5025	-52.3452	-35.6989	-47.3682		0.5025	-56.1939	-65.078	-74.9079		0.5025	-46.7479	-48.8069	-58.4828
0.5075	-54.3106	-37.9907	-46.6397		0.5075	-55.9574	-62.1847	-72.4586		0.5075	-46.578	-52.6822	-64.9918
0.5125	-54.7042	-38.5558	-46.8009		0.5125	-56.481	-66.3028	-77.3303		0.5125	-47.6433	-53.8816	-64.0477
0.5175	-49.6725	-39.8007	-48.6409		0.5175	-56.8805	-66.32	-75.4578		0.5175	-48.0783	-51.087	-62.7879
0.5225	-44.7746	-38.3112	-47.4502		0.5225	-57.6735	-61.2326	-72.2194		0.5225	-47.0057	-53.7358	-64.5968
0.5275	-50.9793	-39.6752	-48.6273		0.5275	-56.7049	-66.2422	-77.0404		0.5275	-47.6165	-55.5527	-66.729
0.5325	-52.1571	-39.1732	-49.6199		0.5325	-57.7634	-63.639	-74.2695		0.5325	-47.2395	-53.9821	-63.9454
0.5375	-50.4407	-38.9817	-50.043		0.5375	-57.0427	-63.3349	-70.9966		0.5375	-48.4434	-58.0848	-67.874
0.5425	-47.9249	-42.4352	-49.4149		0.5425	-57.9756	-66.0358	-77.8416		0.5425	-47.9005	-53.7984	-66.0718
0.5475	-51.7249	-41.5532	-48.8248		0.5475	-58.049	-66.2691	-76.14		0.5475	-48.2363	-54.6122	-67.1096
0.5525	-53.4127	-40.4241	-49.8466		0.5525	-58.5293	-68.5033	-79.7687		0.5525	-48.0969	-55.7201	-65.7728
0.5575	-55.9813	-40.5496	-49.4763		0.5575	-58.6675	-60.8117	-73.1353		0.5575	-48.0981	-56.0484	-64.1763
0.5625	-50.6941	-41.8076	-48.9101		0.5625	-58.4691	-64.2773	-71.9068		0.5625	-48.9621	-60.0184	-66.27
0.5675	-49.018	-40.2228	-50.0698		0.5675	-58.6783	-72.4046	-82.8494		0.5675	-49.3901	-53.0624	-61.0296
0.5725	-45.9895	-42.9036	-50.4246		0.5725	-58.8482	-67.0778	-78.7537		0.5725	-49.6771	-55.7669	-69.4988
0.5775	-46.4768	-40.7506	-50.1793		0.5775	-59.3624	-65.3024	-77.5752		0.5775	-49.7062	-55.3507	-63.8032
0.5825	-49.8449	-40.5511	-50.595		0.5825	-58.9328	-66.6132	-78.4166		0.5825	-51.0478	-57.3016	-71.4757
0.5875	-48.541	-39.4753	-51.185		0.5875	-60.1062	-70.3159	-81.7116		0.5875	-49.1972	-55.7804	-66.3403
0.5925	-51.7604	-43.3052	-50.8761		0.5925	-59.4038	-72.6686	-82.4402		0.5925	-50.1348	-57.7959	-67.3765
0.5975	-54.1151	-41.2448	-50.4736		0.5975	-60.2377	-65.518	-77.0933		0.5975	-49.9624	-56.4347	-67.912
0.6025	-48.5375	-41.5974	-49.6724		0.6025	-59.7655	-65.7603	-84.5454		0.6025	-50.2318	-56.1153	-67.6739
0.6075	-48.5153	-40.9483	-52.0431		0.6075	-60.6614	-69.4786	-82.5958		0.6075	-51.1886	-56.7652	-69.385
0.6125	-47.6795	-42.0578	-50.6169		0.6125	-60.6864	-67.0065	-79.8568		0.6125	-51.9402	-59.391	-69.9487
0.6175	-56.6775	-41.8195	-50.4511		0.6175	-61.3432	-66.0858	-79.0371		0.6175	-51.4582	-57.0446	-70.1229
0.6225	-51.2137	-41.5348	-51.6248		0.6225	-61.1474	-70.0337	-83.5717		0.6225	-51.9993	-59.5838	-73.5579
0.6275	-46.5677	-41.7914	-50.1703		0.6275	-61.6748	-70.893	-83.1004		0.6275	-51.6	-56.443	-66.7627
0.6325	-54.5892	-45.932	-51.8067		0.6325	-61.9351	-69.1747	-80.7013		0.6325	-51.4646	-53.7766	-67.639
0.6375	-51.3536	-45.0179	-51.8598		0.6375	-61.2308	-66.7882	-80.6997		0.6375	-53.0955	-62.9331	-75.3539
0.6425	-55.1723	-43.5568	-50.4431		0.6425	-62.8254	-71.1582	-84.3353		0.6425	-52.867	-60.4368	-73.4906
0.6475	-52.2864	-42.1573	-51.0955		0.6475	-62.4483	-72.1571	-83.6061		0.6475	-52.8131	-57.711	-71.9952
0.6525	-52.8414	-44.8862	-52.0342		0.6525	-62.4987	-71.1382	-85.052		0.6525	-53.2122	-61.9971	-73.5324
0.6575	-52.7974	-46.305	-52.0547		0.6575	-63.5353	-72.2719	-83.5443		0.6575	-54.1894	-61.8292	-72.7522
0.6625	-49.9089	-43.1157	-52.0755		0.6625	-63.6342	-71.0165	-81.6567		0.6625	-53.1204	-61.0807	-74.7933
0.6675	-47.4641	-44.0363	-52.4481		0.6675	-63.4156	-71.1957	-81.3126		0.6675	-54.2506	-58.5968	-72.5877
0.6725	-49.4314	-44.6174	-53.2014		0.6725	-64.1659	-70.7166	-85.5951		0.6725	-53.2717	-62.8031	-77.5677
0.6775	-49.543	-42.7889	-51.995		0.6775	-63.4858	-72.447	-86.7535		0.6775	-54.2215	-61.658	-76.2039
0.6825	-53.5937	-44.2417	-52.7829		0.6825	-64.1899	-69.7776	-83.7136		0.6825	-55.0757	-56.1686	-71.1969
0.6875	-58.0149	-44.7713	-51.9303		0.6875	-65.9181	-70.6369	-85.7318		0.6875	-54.6052	-58.2131	-72.4766
0.6925	-55.5578	-45.4684	-52.1891		0.6925	-65.1392	-69.1573	-82.4624		0.6925	-55.0675	-64.5638	-78.4433
0.6975	-52.3726	-44.5148	-51.5454		0.6975	-65.2237	-70.7134	-83.5761		0.6975	-54.1159	-62.1464	-75.9572
0.7025	-60.1679	-46.4302	-53.5911		0.7025	-64.4091	-72.5462	-87.4432		0.7025	-54.3725	-62.4855	-73.258
0.7075	-54.8737	-45.4444	-52.4209		0.7075	-64.156	-69.8524	-83.0499		0.7075	-55.5751	-60.4835	-74.0036
0.7125	-54.4597	-45.2661	-52.2762		0.7125	-66.2683	-72.2791	-86.777		0.7125	-55.3622	-58.7991	-71.9933
0.7175	-56.698	-46.3955	-53.1249		0.7175	-66.2265	-69.7961	-84.0799		0.7175	-55.1206	-64.0027	-75.6075
0.7225	-50.7925	-45.5842	-52.5139		0.7225	-65.6119	-74.2378	-90.3843		0.7225	-55.3235	-65.33	-77.2787
0.7275	-56.9054	-46.0289	-53.1651		0.7275	-66.8366	-73.7993	-87.5127		0.7275	-57.2637	-64.9045	-77.685
0.7325	-53.7596	-47.5227	-52.5943		0.7325	-66.8392	-76.1017	-91.0344		0.7325	-56.9729	-62.35	-76.8662
0.7375	-56.8103	-45.9358	-52.7135		0.7375	-66.1725	-74.1246	-88.414		0.7375	-58.2056	-61.7786	-74.7052
0.7425	-55.7844	-47.054	-52.6149		0.7425	-67.7036	-74.4724	-88.63		0.7425	-57.105	-62.5962	-76.9615
0.7475	-58.8387	-46.8664	-52.9949		0.7475	-66.9349	-75.5709	-91.6865		0.7475	-56.4534	-63.8382	-75.0538
0.7525	-51.8222	-46.5086	-53.3866		0.7525	-66.7144	-71.8274	-83.362		0.7525	-57.8333	-66.3098	-80.055
0.7575	-55.5783	-45.7434	-53.0419		0.7575	-67.526	-70.3462	-83.0373		0.7575	-57.9124	-67.2042	-79.8542
0.7625	-53.3656	-46.0113	-52.9822		0.7625	-67.2921	-73.8342	-89.0722		0.7625	-58.5959	-62.5717	-76.7278
0.7675	-56.7683	-46.571	-52.3735		0.7675	-68.6295	-74.4863	-85.8896		0.7675	-58.8498	-66.2675	-78.6192
0.7725	-51.9574	-47.9633	-53.1431		0.7725	-68.2559	-72.0775	-82.9765		0.7725	-59.29	-66.4692	-79.9298
0.7775	-54.0419	-46.7866	-53.3361		0.7775	-68.8664	-71.6791	-85.5868		0.7775	-58.2148	-62.8874	-76.6082
0.7825	-55.8332	-47.3207	-52.8403		0.7825	-68.1338	-76.9145	-87.3322		0.7825	-59.0701	-66.8579	-81.2188
0.7875	-52.7644	-46.8909	-53.0646		0.7875	-68.4521	-76.5778	-91.1055		0.7875	-59.5199	-66.6998	-79.3544
0.7925	-54.9025	-49.012	-52.4085		0.7925	-68.5301	-77.1046	-89.194		0.7925	-59.5967	-64.0165	-75.8739
0.7975	-50.3556	-48.5179	-53.8765		0.7975	-69.3178	-74.3881	-87.5394		0.7975	-59.8294	-64.338	-81.2589
0.8025	-49.4292	-47.5253	-53.1226		0.8025	-69.3477	-77.6267	-90.6285		0.8025	-60.4959	-68.6205	-81.3585
0.8075	-54.3227	-50.0074	-51.8885		0.8075	-69.6551	-79.1168	-93.8422		0.8075	-60.1141	-69.7292	-85.4079
0.8125	-55.5434	-47.0481	-52.8974		0.8125	-69.5504	-80.7759	-95.2373		0.8125	-60.5862	-66.9487	-81.9972
0.8175	-57.5977	-47.0133	-53.3849		0.8175	-69.9911	-76.1295	-91.0473		0.8175	-61.0553	-70.568	-86.1716
0.8225	-48.2121	-49.7008	-53.0153		0.8225	-70.6217	-82.1874	-97.299		0.8225	-60.2793	-67.6839	-81.8095
0.8275	-46.5556	-51.0309	-53.0632		0.8275	-70.0913	-80.8327	-93.0626		0.8275	-62.2625	-70.0598	-85.0801
0.8325	-48.8654	-50.0354	-52.5956		0.8325	-71.2267	-83.3117	-97.0628		0.8325	-61.7174	-67.3475	-84.6384
0.8375	-48.5359	-48.2886	-53.135		0.8375	-71.1616	-79.7479	-98.329		0.8375	-62.4865	-66.2976	-81.4912
0.8425	-52.7218	-49.207	-53.1683		0.8425	-71.307	-79.4331	-93.8662		0.8425	-62.702	-72.0291	-84.065
0.8475	-52.9058	-47.7736	-53.1687		0.8475	-71.3714	-79.1814	-87.6139		0.8475	-62.3445	-64.8193	-78.4063
0.8525	-52.0316	-47.3566	-52.7159		0.8525	-71.9709	-79.4646	-92.3926		0.8525	-62.8785	-61.9472	-74.8772
0.8575	-49.3296	-49.1466	-51.8814		0.8575	-71.962	-73.8471	-85.8687		0.8575	-62.3285	-64.0663	-78.8046
0.8625	-49.1864	-47.558	-53.2918		0.8625	-73.2528	-75.5153	-89.1183		0.8625	-63.4861	-66.3905	-77.887
0.8675	-51.6823	-50.5531	-53.0791		0.8675	-73.1022	-76.8755	-91.6734		0.8675	-62.7321	-66.1538	-80.6126
0.8725	-50.4061	-46.9112	-53.1791		0.8725	-72.2222	-77.8773	-91.9757		0.8725	-63.3717	-69.3478	-83.5782
0.8775	-48.2062	-47.4045	-53.4608		0.8775	-73.1341	-82.2107	-95.2861		0.8775	-64.0177	-66.9271	-79.6282
0.8825	-51.2329	-53.1015	-53.5246		0.8825	-73.3646	-76.934	-90.8623		0.8825	-63.5229	-73.8385	-82.65
0.8875	-49.3633	-49.2634	-53.6006		0.8875	-73.5468	-81.4911	-94.3856		0.8875	-63.4553	-67.375	-81.3129
0.8925	-49.9007	-48.3544	-53.5806		0.8925	-75.0146	-77.4948	-92.572		0.8925	-64.3283	-66.3054	-81.6879
0.8975	-49.4537	-51.3936	-52.5722		0.8975	-74.9956	-76.3123	-90.1554		0.8975	-65.0435	-65.7392	-79.7738
0.9025	-60.9281	-52.8558	-52.7807		0.9025	-75.609	-74.509	-88.071		0.9025	-65.5044	-67.325	-80.9064
0.9075	-50.7365	-50.8524	-53.6578		0.9075	-76.779	-83.615	-96.4747		0.9075	-64.9228	-71.4198	-83.7884
0.9125	-50.7954	-50.0201	-52.3504		0.9125	-75.5491	-75.6752	-88.8175		0.9125	-64.6823	-66.74	-82.5626
0.9175	-49.6613	-51.6358	-52.2991		0.9175	-76.1053	-83.2189	-96.2207		0.9175	-65.0862	-74.606	-88.8485
0.9225	-47.7329	-49.3829	-53.2699		0.9225	-76.2161	-82.5605	-95.6584		0.9225	-64.4046	-66.9603	-81.0433
0.9275	-48.9264	-50.4889	-53.3787		0.9275	-76.2085	-80.4623	-95.6267		0.9275	-66.0638	-76.3245	-89.3668
0.9325	-48.9356	-49.4057	-53.1778		0.9325	-77.2807	-90.531	-101.904		0.9325	-66.3549	-71.8777	-86.7855
0.9375	-57.8992	-47.9943	-53.3212		0.9375	-77.3018	-82.7592	-96.6019		0.9375	-65.6666	-67.1561	-81.039
0.9425	-53.8526	-49.9321	-53.944		0.9425	-77.5745	-78.011	-90.9588		0.9425	-66.8034	-77.059	-88.7261
0.9475	-48.9099	-49.6717	-53.1463		0.9475	-77.8155	-86.2356	-100.972		0.9475	-66.9662	-73.4317	-87.5573
0.9525	-48.3058	-47.9993	-53.2032		0.9525	-77.4219	-79.58	-94.3679		0.9525	-67.486	-75.1323	-89.9293
0.9575	-56.9531	-50.632	-52.7157		0.9575	-78.2663	-86.6354	-99.6614		0.9575	-66.7422	-71.5519	-84.2586
0.9625	-63.8266	-51.9751	-53.6654		0.9625	-77.8124	-83.8087	-95.9407		0.9625	-67.5364	-75.0153	-87.7873
0.9675	-55.5067	-48.7361	-52.2334		0.9675	-78.0341	-84.1939	-101.032		0.9675	-66.9195	-64.7578	-78.2992
0.9725	-62.3304	-50.8932	-52.1903		0.9725	-78.2078	-76.5725	-89.4629		0.9725	-67.3244	-70.225	-84.5445
0.9775	-59.4808	-49.2213	-52.9435		0.9775	-78.2408	-85.8137	-97.9355		0.9775	-68.8475	-73.8782	-88.9503
0.9825	-56.1663	-50.9949	-53.0555		0.9825	-78.7123	-80.9176	-97.4882		0.9825	-68.6005	-66.4224	-80.07
0.9875	-48.3082	-47.3938	-53.2777		0.9875	-78.5366	-79.2856	-92.0436		0.9875	-69.1725	-71.6628	-84.6221
0.9925	-50.4063	-51.9989	-52.7348		0.9925	-78.9823	-81.6872	-94.7169		0.9925	-67.3285	-70.1896	-82.6112
0.9975	-55.1637	-47.9998	-53.4781		0.9975	-77.6959	-83.7813	-96.8991		0.9975	-69.7938	-72.9403	-81.5977
1.0025	-50.7132	-51.5559	-53.7448		1.0025	-79.1722	-84.4343	-97.224		1.0025	-70.0007	-73.823	-86.343
1.0075	-53.561	-49.9789	-53.2202		1.0075	-80.0507	-84.1249	-97.7448		1.0075	-70.6018	-76.9549	-88.5273
1.0125	-58.1545	-50.6811	-53.159		1.0125	-79.9215	-78.645	-93.0052		1.0125	-70.433	-70.5109	-84.3515
1.0175	-61.2331	-51.845	-53.8058		1.0175	-79.7559	-81.4301	-95.5299		1.0175	-70.0247	-76.6553	-91.7542
1.0225	-50.5461	-51.3916	-53.198		1.0225	-80.1956	-82.7382	-95.1539		1.0225	-70.924	-75.0802	-90.0597
1.0275	-49.457	-50.3614	-53.2242		1.0275	-80.354	-81.5634	-93.636		1.0275	-71.5216	-76.7453	-91.6467
1.0325	-47.3768	-52.9393	-53.5265		1.0325	-80.3279	-85.7918	-104.771		1.0325	-73.3671	-80.1529	-95.9046
1.0375	-47.7536	-50.6731	-53.349		1.0375	-80.7998	-92.0788	-104.76		1.0375	-73.3398	-80.9804	-96.3128
1.0425	-379.298	-379.298	-379.298		1.0425	-80.5358	-90.0778	-104.514		1.0425	-72.3204	-79.6118	-94.0318
1.0475	-379.298	-379.298	-379.298		1.0475	-80.9889	-92.9946	-107.139		1.0475	-72.6496	-79.9136	-91.4709
1.0525	-379.298	-379.298	-379.298		1.0525	-81.7503	-79.6442	-94.6797		1.0525	-73.043	-72.5106	-87.5974
1.0575	-379.298	-379.298	-379.298		1.0575	-81.7699	-87.6165	-100.975		1.0575	-73.0683	-73.2269	-87.475
1.0625	-379.298	-379.298	-379.298		1.0625	-81.9562	-85.8272	-102.574		1.0625	-74.2658	-73.3321	-87.4046
1.0675	-379.298	-379.298	-379.298		1.0675	-82.1054	-92.6444	-104.213		1.0675	-73.5399	-77.5177	-93.8088
1.0725	-379.298	-379.298	-379.298		1.0725	-82.2357	-89.9646	-105.797		1.0725	-73.0909	-76.148	-90.0883
1.0775	-379.298	-379.298	-379.298		1.0775	-81.8337	-85.6658	-97.1595		1.0775	-74.4281	-78.0397	-91.4683
1.0825	-379.298	-379.298	-379.298		1.0825	-82.9528	-88.131	-102.996		1.0825	-73.8747	-80.4874	-92.9582
1.0875	-379.298	-379.298	-379.298		1.0875	-82.6762	-87.5975	-103.061		1.0875	-74.0246	-80.4238	-94.8809
1.0925	-379.298	-379.298	-379.298		1.0925	-83.7776	-80.4123	-93.2785		1.0925	-73.912	-80.6668	-95.9582
1.0975	-379.298	-379.298	-379.298		1.0975	-83.8262	-84.9085	-100.564		1.0975	-73.5807	-76.2373	-88.732
1.1025	-379.298	-379.298	-379.298		1.1025	-83.3545	-91.4993	-103.377		1.1025	-75.1752	-77.1639	-89.4908
1.1075	-379.298	-379.298	-379.298		1.1075	-85.1355	-89.9554	-103.519		1.1075	-74.9735	-78.6378	-93.5497
1.1125	-379.298	-379.298	-379.298		1.1125	-85.7959	-92.1561	-105.312		1.1125	-75.3984	-86.1708	-104.461
1.1175	-379.298	-379.298	-379.298		1.1175	-85.2933	-99.2143	-114.37		1.1175	-76.1577	-74.9917	-88.654
1.1225	-379.298	-379.298	-379.298		1.1225	-86.5118	-85.7544	-99.0456		1.1225	-75.1173	-84.6329	-97.6256
1.1275	-379.298	-379.298	-379.298		1.1275	-85.8893	-95.4647	-109.047		1.1275	-75.5683	-75.4713	-91.172
1.1325	-379.298	-379.298	-379.298		1.1325	-86.639	-87.9148	-101.336		1.1325	-75.9925	-83.5866	-96.4495
1.1375	-379.298	-379.298	-379.298		1.1375	-87.2537	-92.6302	-105.647		1.1375	-76.2438	-77.158	-90.4352
1.1425	-379.298	-379.298	-379.298		1.1425	-87.4312	-90.975	-104.075		1.1425	-76.7286	-80.8262	-94.5288
1.1475	-379.298	-379.298	-379.298		1.1475	-87.9477	-94.2699	-110.276		1.1475	-76.5536	-81.6951	-94.0573
1.1525	-379.298	-379.298	-379.298		1.1525	-87.5956	-90.565	-102.442		1.1525	-76.3757	-77.9434	-95.1071
1.1575	-379.298	-379.298	-379.298		1.1575	-87.5286	-91.8417	-107.218		1.1575	-76.6451	-87.7369	-101.025
1.1625	-379.298	-379.298	-379.298		1.1625	-87.5159	-94.8067	-104.817		1.1625	-77.0369	-83.244	-98.1884
1.1675	-379.298	-379.298	-379.298		1.1675	-88.4309	-89.6294	-106.385		1.1675	-77.2825	-74.0748	-88.1263
1.1725	-379.298	-379.298	-379.298		1.1725	-87.9956	-89.3312	-102.752		1.1725	-77.8454	-86.2949	-104.501
1.1775	-379.298	-379.298	-379.298		1.1775	-88.3965	-98.0557	-117.501		1.1775	-78.137	-74.2871	-87.0432
1.1825	-379.298	-379.298	-379.298		1.1825	-89.1119	-97.57	-110.989		1.1825	-78.1599	-79.4867	-92.6733
1.1875	-379.298	-379.298	-379.298		1.1875	-89.0967	-94.3584	-103.368		1.1875	-78.014	-77.0469	-90.4449
1.1925	-379.298	-379.298	-379.298		1.1925	-88.9398	-83.1112	-101.335		1.1925	-78.9582	-83.1683	-93.3747
1.1975	-379.298	-379.298	-379.298		1.1975	-89.1588	-98.4196	-117.004		1.1975	-80.0478	-81.6005	-96.0723
1.2025	-379.298	-379.298	-379.298		1.2025	-88.8363	-93.1497	-107.082		1.2025	-79.961	-88.8382	-103.216
1.2075	-379.298	-379.298	-379.298		1.2075	-89.5268	-91.9186	-108.645		1.2075	-79.6925	-75.2605	-89.2015
1.2125	-379.298	-379.298	-379.298		1.2125	-88.9483	-94.9631	-108.771		1.2125	-79.5769	-91.0197	-104.664
1.2175	-379.298	-379.298	-379.298		1.2175	-89.5153	-104.162	-118.295		1.2175	-80.7782	-82.6493	-96.7581
1.2225	-379.298	-379.298	-379.298		1.2225	-89.3833	-94.159	-107.981		1.2225	-81.1047	-81.2343	-94.6472
1.2275	-379.298	-379.298	-379.298		1.2275	-90.0005	-92.4811	-105.446		1.2275	-82.4357	-84.5575	-97.714
1.2325	-379.298	-379.298	-379.298		1.2325	-90.0944	-99.5179	-111.215		1.2325	-81.7731	-81.5012	-92.9676
1.2375	-379.298	-379.298	-379.298		1.2375	-90.1888	-91.6377	-106.304		1.2375	-81.592	-83.6787	-96.3809
1.2425	-379.298	-379.298	-379.298		1.2425	-89.3718	-101.329	-114.883		1.2425	-82.4163	-86.9292	-100.193
1.2475	-379.298	-379.298	-379.298		1.2475	-90.5312	-100.287	-113.374		1.2475	-82.4854	-78.064	-93.1877
					1.2525	-90.6466	-89.7831	-103.649		1.2525	-82.8774	-82.4851	-103.005
					1.2575	-90.6255	-93.4322	-109.883		1.2575	-82.5644	-86.0393	-100.006
					1.2625	-90.6932	-88.7867	-102.191		1.2625	-83.2893	-93.5719	-109.486
					1.2675	-90.9442	-100.271	-119.788		1.2675	-83.3118	-92.3726	-106.276
					1.2725	-90.2904	-101.229	-113.924		1.2725	-82.4851	-85.2796	-97.9257
					1.2775	-90.7484	-98.5535	-114.06		1.2775	-83.8314	-72.1831	-87.824
					1.2825	-91.2933	-84.7249	-97.0586		1.2825	-83.4806	-86.3035	-103.021
					1.2875	-91.8906	-88.2296	-108.697		1.2875	-83.3388	-81.1081	-95.2905
					1.2925	-90.7659	-92.0189	-106.398		1.2925	-84.3152	-85.7679	-100.54
					1.2975	-92.3515	-90.2089	-103.675		1.2975	-84.008	-87.5478	-101.572
					1.3025	-92.5034	-89.9512	-103.42		1.3025	-84.6187	-84.1594	-98.7602
					1.3075	-93.6942	-101.138	-117.661		1.3075	-85.399	-88.6414	-101.456
					1.3125	-92.5062	-99.1625	-112.694		1.3125	-85.0218	-92.686	-109.404
					1.3175	-93.3684	-106.648	-124.655		1.3175	-85.5373	-83.9922	-96.3795
					1.3225	-94.3552	-94.7487	-107.298		1.3225	-85.1633	-75.7398	-85.6541
					1.3275	-94.3191	-99.2166	-116.438		1.3275	-85.3131	-73.3002	-90.9323
					1.3325	-94.9952	-96.8837	-110.775		1.3325	-85.9103	-94.9529	-108.958
					1.3375	-95.4769	-106.207	-120.007		1.3375	-85.121	-93.2366	-106.435
					1.3425	-96.4221	-108.81	-122.97		1.3425	-85.8986	-85.7452	-99.7451
					1.3475	-96.9009	-106.101	-117.896		1.3475	-86.8283	-87.001	-100.679
					1.3525	-97.2518	-93.6424	-106.548		1.3525	-86.7199	-94.2235	-109.391
					1.3575	-97.479	-101.513	-116.501		1.3575	-86.4725	-93.5719	-105.281
					1.3625	-98.5421	-104.363	-117.464		1.3625	-86.7167	-86.3556	-99.2249
					1.3675	-98.3372	-94.2495	-108.009		1.3675	-87.2331	-92.6946	-111.071
					1.3725	-99.06	-100.746	-116.205		1.3725	-86.7621	-97.2082	-115.533
					1.3775	-98.8202	-106.795	-122.849		1.3775	-87.3806	-87.0027	-99.6552
					1.3825	-99.2968	-98.2582	-110.798		1.3825	-87.2125	-88.4031	-102.741
					1.3875	-98.3575	-104.713	-129.242		1.3875	-87.6648	-92.7012	-108.65
					1.3925	-99.4806	-105.769	-119.044		1.3925	-87.6722	-90.2604	-107.058
					1.3975	-99.565	-102.709	-117.137		1.3975	-88.7807	-101.359	-116.537
					1.4025	-100.432	-113.93	-129.394		1.4025	-88.8255	-76.733	-90.5452
					1.4075	-100.085	-90.0214	-103.765		1.4075	-87.956	-88.6248	-107.659
					1.4125	-100.099	-102.791	-120.559		1.4125	-87.1729	-87.6461	-100.041
					1.4175	-99.2983	-89.5559	-102.623		1.4175	-89.4891	-94.7793	-116.367
					1.4225	-100.022	-100.562	-121.796		1.4225	-89.8066	-103.736	-110.781
					1.4275	-100.372	-111.923	-124.305		1.4275	-90.5725	-94.1978	-107.877
					1.4325	-100.31	-105.076	-118.971		1.4325	-90.6953	-94.9937	-105.699
					1.4375	-100.582	-108.824	-120.038		1.4375	-91.1506	-91.6423	-105.396
					1.4425	-100.461	-102.055	-114.795		1.4425	-91.66	-99.0511	-113.486
					1.4475	-100.295	-95.287	-108.331		1.4475	-91.7565	-102.545	-120.024
					1.4525	-100.585	-110.389	-125.155		1.4525	-91.8873	-95.9476	-109.639
					1.4575	-100.2	-106.921	-120.278		1.4575	-92.4121	-94.6965	-110.632
					1.4625	-100.009	-106.538	-122.664		1.4625	-93.2906	-104.221	-117.235
					1.4675	-100.686	-115.029	-127.09		1.4675	-93.4386	-98.1357	-110.97
					1.4725	-100.646	-112.453	-123.644		1.4725	-93.6235	-93.2953	-107.712
					1.4775	-100.632	-103.981	-118.718		1.4775	-93.7103	-103.728	-116.827
					1.4825	-100.435	-111.469	-125.255		1.4825	-94.3857	-102.512	-116.46
					1.4875	-100.853	-104.783	-117.696		1.4875	-94.4514	-97.9479	-111.468
					1.4925	-101.095	-108.599	-122.823		1.4925	-94.7914	-107.383	-122.045
					1.4975	-101.365	-118.654	-135.707		1.4975	-94.7919	-94.6133	-107.802
					1.5025	-101.537	-118.985	-130.406		1.5025	-95.2794	-95.5198	-117.926
					1.5075	-101.869	-100.617	-116.142		1.5075	-93.4967	-102.761	-117.114
					1.5125	-101.797	-112.464	-128.091		1.5125	-94.4256	-106.937	-121.437
					1.5175	-102.152	-117.828	-133.697		1.5175	-95.6546	-105.656	-122.298
					1.5225	-103.324	-112.229	-127.864		1.5225	-96.0973	-104.946	-119.468
					1.5275	-103.362	-110.968	-128.787		1.5275	-95.9514	-108.516	-123.631
					1.5325	-103.845	-116.588	-131.552		1.5325	-96.3192	-110.901	-125.436
					1.5375	-103.828	-120.787	-136.431		1.5375	-96.2039	-104.135	-115.056
					1.5425	-104.226	-115.99	-126.682		1.5425	-96.0401	-98.497	-112.045
					1.5475	-104.599	-104.603	-116.03		1.5475	-96.2295	-98.8602	-113.08
					1.5525	-104.908	-107.422	-125.627		1.5525	-96.7682	-104.422	-113.463
					1.5575	-105.569	-116.004	-124.356		1.5575	-96.6127	-94.9212	-108.566
					1.5625	-106.043	-105.974	-120.164		1.5625	-96.8709	-91.3546	-105.049
					1.5675	-106.2	-102.72	-116.073		1.5675	-96.8486	-103.328	-112.868
					1.5725	-106.134	-113.838	-123.889		1.5725	-98.1277	-90.8262	-104.511
					1.5775	-107.191	-101.734	-115.468		1.5775	-96.735	-105.092	-120.502
					1.5825	-106.504	-115.619	-130.344		1.5825	-96.9644	-105.37	-118.151
					1.5875	-106.526	-116.129	-129.446		1.5875	-97.4611	-98.8077	-109.067
					1.5925	-107.004	-117.917	-128.065		1.5925	-97.9274	-96.9421	-113.618
					1.5975	-107.62	-117.216	-132.583		1.5975	-98.3229	-106.902	-121.679
					1.6025	-107.732	-113.693	-124.492		1.6025	-98.5784	-104.094	-116.707
					1.6075	-107.8	-103.756	-117.731		1.6075	-98.7615	-114.017	-124.921
					1.6125	-108.083	-113.266	-130.103		1.6125	-99.9339	-101.627	-114.964
					1.6175	-107.695	-111.677	-125.5		1.6175	-99.8475	-94.3001	-108.158
					1.6225	-108.116	-108.108	-120.691		1.6225	-99.6172	-103.055	-121.56
					1.6275	-108.182	-110.945	-125.67		1.6275	-100.324	-100.992	-112.071
					1.6325	-108.291	-112.886	-126.358		1.6325	-99.8677	-95.6824	-108.549
					1.6375	-108.279	-105.142	-118.299		1.6375	-100.615	-91.3182	-104.008
					1.6425	-108.994	-105.605	-117.931		1.6425	-99.4224	-100.539	-115.007
					1.6475	-108.242	-110.928	-124.48		1.6475	-101.354	-113.198	-127.164
					1.6525	-109.064	-106.146	-119.137		1.6525	-101.509	-107.57	-120.953
					1.6575	-109.658	-123.875	-138.36		1.6575	-101.51	-112.586	-129.642
					1.6625	-110.05	-123.771	-139.555		1.6625	-101.596	-104.299	-117.266
					1.6675	-110.607	-112.035	-125.027		1.6675	-101.632	-108.386	-121.632
					1.6725	-110.629	-119.453	-132.623		1.6725	-101.429	-106.197	-119.446
					1.6775	-111.485	-117.205	-130.472		1.6775	-101.522	-115.755	-135.784
					1.6825	-112.091	-134.453	-157.216		1.6825	-101.762	-128.968	-147.62
					1.6875	-112.741	-148.938	-166.453		1.6875	-101.337	-126.872	-145.806
					1.6925	-113.684	-129.505	-142.173		1.6925	-101.303	-111.675	-124.317
					1.6975	-114.724	-123.383	-134.882		1.6975	-101.13	-122.177	-145.405
					1.7025	-115.716	-133.122	-152.561		1.7025	-101.356	-128.437	-149.348
					1.7075	-116.596	-138.279	-159.956		1.7075	-101.089	-137.698	-159.07
					1.7125	-118.432	-147.053	-167.356		1.7125	-101.042	-126.67	-145.937
					1.7175	-120.13	-137.701	-156.764		1.7175	-101.145	-113.311	-126.605
					1.7225	-121.798	-139.32	-156.617		1.7225	-101.489	-124.915	-150.72
					1.7275	-123.857	-145.07	-161.685		1.7275	-101.285	-122.862	-138.505
					1.7325	-123.535	-131.704	-144.367		1.7325	-101.416	-117.007	-130.244
					1.7375	-122.372	-131.326	-146.828		1.7375	-101.585	-128.869	-149.724
					1.7425	-119.971	-144.069	-158.284		1.7425	-101.953	-135.324	-157.281
					1.7475	-118.393	-161.088	-169.673		1.7475	-102.236	-143.823	-159.775
					1.7525	-117.001	-172.566	-168.393		1.7525	-102.491	-110.156	-123.15
					1.7575	-115.637	-121.147	-134.132		1.7575	-102.836	-127.621	-144.715
					1.7625	-114.476	-138.604	-155.778		1.7625	-103.365	-138.905	-152.303
					1.7675	-113.473	-142.502	-153.089		1.7675	-103.815	-140.216	-148.096
					1.7725	-112.629	-159.309	-162.997		1.7725	-104.354	-107.836	-120.849
					1.7775	-111.848	-118.662	-131.632		1.7775	-105.047	-133.681	-158.372
					1.7825	-111.258	-141.187	-166.914		1.7825	-105.625	-139.26	-147.066
					1.7875	-110.585	-126.799	-139.702		1.7875	-106.52	-136.077	-148.44
					1.7925	-110.127	-121.638	-134.645		1.7925	-107.47	-116.602	-129.788
					1.7975	-109.645	-145.789	-167.564		1.7975	-108.568	-131.096	-144.445
					1.8025	-109.285	-140.648	-153.473		1.8025	-109.952	-144.716	-159.418
					1.8075	-108.944	-169.842	-168.695		1.8075	-111.488	-161.802	-159.27
					1.8125	-108.685	-172.249	-166.008		1.8125	-113.324	-134.156	-146.867
					1.8175	-108.438	-169.893	-168.783		1.8175	-115.576	-133.888	-149.041
					1.8225	-108.273	-167.482	-167.365		1.8225	-117.767	-153.143	-159.763
					1.8275	-108.11	-166.778	-168.529		1.8275	-119.863	-163.206	-160.554
					1.8325	-108.027	-173.837	-168.48		1.8325	-119.535	-164.787	-159.817
					1.8375	-107.936	-172.95	-168.067		1.8375	-117.303	-110.649	-124.539
					1.8425	-107.918	-172.885	-168.395		1.8425	-114.491	-123.09	-160.624
					1.8475	-107.895	-173.439	-169.185		1.8475	-112.461	-122.72	-135.843
					1.8525	-107.941	-127.989	-140.864		1.8525	-111.02	-127.639	-140.553
					1.8575	-107.98	-149.549	-169.246		1.8575	-109.606	-144.194	-158.328
					1.8625	-108.059	-125.575	-138.588		1.8625	-108.352	-160.979	-155.43
					1.8675	-108.121	-130.627	-145.879		1.8675	-107.288	-164.272	-157.342
					1.8725	-108.277	-152.254	-162.185		1.8725	-106.351	-122.194	-135.018
					1.8775	-108.409	-163.702	-166.823		1.8775	-105.594	-148.202	-158.968
					1.8825	-108.581	-171.197	-166.979		1.8825	-104.859	-158.165	-159.702
					1.8875	-108.724	-134.905	-136.422		1.8875	-104.257	-132.165	-145.178
					1.8925	-108.905	-119.504	-134.357		1.8925	-103.693	-151.649	-160.3
					1.8975	-109.035	-150.161	-166.553		1.8975	-103.219	-118.064	-130.7
					1.9025	-109.231	-129.055	-141.564		1.9025	-102.74	-131.615	-157.616
					1.9075	-109.363	-143.361	-166.076		1.9075	-102.249	-151.859	-159.702
					1.9125	-109.641	-159.515	-168.878		1.9125	-101.443	-161.792	-160.598
					1.9175	-110.111	-169.075	-169.123		1.9175	-379.298	-379.298	-379.298

## Sheet: IR3
Measured					Old					New
Bands	63	1000	16000		Bands	63	1000	16000		Bands	63	1000	16000
RT60	1.26198	1.49375	1.1219		RT60	1.41402	1.66063	0.833274		RT60	1.39137	1.61037	0.834333
EDT	0	0	0		EDT	0	0	0		EDT	0	0	0
DRR	-45.2206	-3.63661	-2.18453		DRR	-17.5159	6.52102	9.98484		DRR	-24.371	-3.7662	-0.997635
C50	5.76616	4.5282	2.617		C50	5.47207	14.4151	18.5365		C50	3.25383	7.33145	10.3834
C80	8.46223	6.16765	5.39831		C80	6.92328	15.6625	20.7457		C80	5.04896	8.74606	12.7373
D50	79.0461	73.9362	64.6248		D50	77.9024	96.5081	98.6186		D50	67.9009	84.3978	91.6129
TS	0.033514	0.046663	0.049802		TS	0.04279	0.007542	0.002611		TS	0.05973	0.032004	0.015195
Bands	63	1000	16000		Bands	63	1000	16000		Bands	63	1000	16000
0.0025	-19.2329	7.92753	-0.274267		0.0025	-31.1384	-6.53892	-0.186947		0.0025	-20.3298	-7.44132	-2.40089
0.0075	2.59693	1.21847	-8.51319		0.0075	-19.3753	-16.7632	-13.3992		0.0075	-11.2866	-9.1902	-11.027
0.0125	2.02079	-4.35684	-13.7418		0.0125	-23.7667	-20.3173	-22.1605		0.0125	-17.8716	-14.7231	-9.35537
0.0175	-5.03197	-4.48618	-13.8767		0.0175	-28.283	-26.3324	-20.1518		0.0175	-19.4681	-15.7689	-10.1819
0.0225	-8.88265	-4.55565	-15.9565		0.0225	-29.41	-26.5248	-21.3305		0.0225	-29.2109	-21.0504	-14.5768
0.0275	-14.0971	-4.96077	-13.9217		0.0275	-38.3459	-31.9655	-25.404		0.0275	-22.8244	-21.8834	-17.0823
0.0325	-20.4586	-5.76675	-13.3382		0.0325	-33.8823	-32.6695	-28.076		0.0325	-23.08	-20.1677	-13.9576
0.0375	-11.4198	-4.849	-11.4384		0.0375	-33.2966	-30.9854	-24.7814		0.0375	-23.4801	-20.2067	-14.8201
0.0425	-17.5443	-6.17993	-12.2915		0.0425	-33.8293	-32.0106	-25.8139		0.0425	-26.884	-20.4212	-17.0809
0.0475	-19.3741	-7.3953	-12.2403		0.0475	-36.1794	-31.4255	-27.9846		0.0475	-27.6599	-22.673	-17.9047
0.0525	-16.1273	-7.79483	-13.9894		0.0525	-37.4725	-34.1505	-29.2129		0.0525	-26.9271	-23.8715	-18.7374
0.0575	-8.85517	-7.53546	-10.5535		0.0575	-37.8068	-34.7266	-29.5313		0.0575	-23.3973	-22.1157	-19.0533
0.0625	-12.2141	-8.31624	-13.2592		0.0625	-34.0434	-32.9806	-30.1136		0.0625	-27.434	-22.8066	-19.5142
0.0675	-10.8907	-8.99923	-12.3374		0.0675	-37.8115	-33.8504	-30.7138		0.0675	-26.2146	-22.4586	-19.2929
0.0725	-11.6288	-8.57218	-15.9598		0.0725	-37.0062	-33.4325	-30.1439		0.0725	-25.5142	-23.6548	-19.6343
0.0775	-12.3856	-7.94368	-14.0647		0.0775	-35.8886	-34.4848	-30.5547		0.0775	-25.5645	-25.5153	-19.7933
0.0825	-14.8797	-9.15232	-14.1875		0.0825	-35.7206	-37.2301	-30.8401		0.0825	-26.8602	-22.8505	-19.7648
0.0875	-16.5809	-10.6039	-15.0311		0.0875	-36.912	-33.8963	-30.9343		0.0875	-28.8964	-25.3255	-21.4084
0.0925	-17.2876	-9.0118	-14.6496		0.0925	-39.0859	-35.7684	-32.4444		0.0925	-27.7297	-26.4196	-21.9859
0.0975	-16.3148	-9.08977	-15.6754		0.0975	-37.4351	-37.281	-32.4988		0.0975	-26.3337	-24.2255	-21.9799
0.1025	-9.3515	-10.0814	-15.9709		0.1025	-37.1765	-35.2848	-32.9357		0.1025	-27.4954	-25.4254	-22.2723
0.1075	-15.1559	-10.0906	-16.2564		0.1075	-37.5097	-36.7344	-33.0975		0.1075	-27.9371	-27.8982	-22.5063
0.1125	-18.8732	-9.20866	-15.548		0.1125	-38.2666	-38.8956	-33.4665		0.1125	-29.6977	-26.6681	-22.9459
0.1175	-14.2177	-12.1959	-16.6944		0.1175	-39.715	-38.0678	-33.8564		0.1175	-28.4854	-24.0291	-23.7112
0.1225	-17.1319	-10.2294	-17.237		0.1225	-38.7272	-34.66	-34.3163		0.1225	-28.2414	-25.0207	-23.4294
0.1275	-18.768	-9.6214	-18.9227		0.1275	-38.3773	-35.7238	-34.1436		0.1275	-29.0096	-24.8905	-23.8697
0.1325	-18.4086	-11.4248	-17.8853		0.1325	-38.8464	-35.8233	-34.6728		0.1325	-28.642	-27.2765	-23.8801
0.1375	-20.3022	-12.8939	-17.7553		0.1375	-38.8156	-38.2151	-35.0705		0.1375	-29.281	-26.9167	-25.2509
0.1425	-20.1454	-12.8954	-20.1792		0.1425	-39.3799	-37.8018	-36.4983		0.1425	-28.6341	-26.9392	-25.9459
0.1475	-18.7297	-12.0193	-17.8851		0.1475	-38.773	-38.0104	-36.719		0.1475	-29.0271	-27.3945	-26.1262
0.1525	-19.9454	-11.8726	-17.2345		0.1525	-39.593	-37.6909	-37.0745		0.1525	-29.66	-26.3345	-25.4483
0.1575	-14.3264	-11.0153	-20.0929		0.1575	-39.4496	-37.208	-36.698		0.1575	-30.293	-26.5109	-26.2372
0.1625	-18.1853	-12.0882	-21.5245		0.1625	-40.3271	-37.8897	-37.3519		0.1625	-31.1839	-26.5585	-26.3725
0.1675	-16.1789	-12.8163	-22.0238		0.1675	-40.8408	-37.6764	-37.38		0.1675	-30.4675	-28.2054	-28.0528
0.1725	-15.7006	-12.9658	-20.433		0.1725	-40.338	-39.1824	-38.9452		0.1725	-31.6821	-28.0907	-26.8964
0.1775	-19.5272	-12.846	-19.2637		0.1775	-41.8329	-38.9125	-37.8855		0.1775	-28.6723	-26.0055	-27.4407
0.1825	-15.898	-14.2658	-21.1607		0.1825	-39.3767	-36.8291	-38.1763		0.1825	-29.7438	-28.784	-28.1716
0.1875	-21.2478	-12.9934	-19.8821		0.1875	-39.7255	-39.3154	-38.9642		0.1875	-30.1898	-28.7366	-28.6039
0.1925	-26.8446	-15.7264	-21.1363		0.1925	-40.6644	-39.5613	-39.7269		0.1925	-30.3854	-29.2822	-29.4044
0.1975	-21.4722	-13.6354	-22.9271		0.1975	-40.407	-39.7785	-40.1494		0.1975	-33.9438	-28.7108	-29.7244
0.2025	-26.9518	-13.9183	-20.6507		0.2025	-43.2779	-39.363	-40.6495		0.2025	-33.6554	-28.178	-29.032
0.2075	-20.7291	-15.1757	-22.7334		0.2075	-42.8062	-38.9166	-39.9148		0.2075	-34.3737	-29.0187	-29.3577
0.2125	-28.3767	-13.6762	-21.7978		0.2125	-44.1258	-40.4624	-40.4833		0.2125	-33.7312	-29.0939	-30.9704
0.2175	-29.8744	-13.5666	-23.5654		0.2175	-43.848	-40.0553	-41.524		0.2175	-32.148	-30.0247	-30.6448
0.2225	-35.9989	-13.8829	-25.0319		0.2225	-41.8783	-40.6191	-41.9142		0.2225	-33.1483	-30.508	-30.2434
0.2275	-27.7334	-15.0213	-22.7254		0.2275	-43.1977	-41.6654	-41.4674		0.2275	-33.5471	-30.3348	-30.4513
0.2325	-23.088	-15.5463	-23.1506		0.2325	-43.4676	-41.212	-41.5968		0.2325	-33.7136	-31.3615	-32.3401
0.2375	-24.5852	-15.8894	-23.5285		0.2375	-43.4797	-42.4292	-42.992		0.2375	-31.0587	-30.3136	-31.7955
0.2425	-27.4967	-16.0693	-24.5685		0.2425	-41.6934	-41.3903	-42.6401		0.2425	-34.1087	-30.6915	-32.1481
0.2475	-24.805	-17.1211	-23.7617		0.2475	-43.8891	-42.2021	-43.1825		0.2475	-34.635	-30.866	-32.282
0.2525	-24.9289	-15.4011	-23.3707		0.2525	-44.1238	-41.5782	-43.1951		0.2525	-34.2679	-32.2394	-32.6479
0.2575	-24.6797	-14.012	-24.0559		0.2575	-44.2369	-43.3978	-43.8854		0.2575	-30.8718	-30.5358	-33.7535
0.2625	-24.0898	-16.5176	-26.2372		0.2625	-41.4225	-41.4927	-44.7629		0.2625	-34.6895	-30.3069	-34.1898
0.2675	-26.5435	-16.1851	-25.441		0.2675	-44.3459	-41.3101	-45.0548		0.2675	-33.6465	-31.1631	-34.3416
0.2725	-30.739	-16.0981	-26.706		0.2725	-43.6587	-42.0943	-45.2992		0.2725	-33.5759	-31.4537	-34.3664
0.2775	-27.6253	-18.2854	-23.2778		0.2775	-43.7471	-42.1561	-45.1521		0.2775	-31.8571	-32.8108	-35.1715
0.2825	-21.0031	-19.5999	-27.4661		0.2825	-42.6086	-43.5561	-46.0723		0.2825	-36.1404	-32.2313	-34.8289
0.2875	-23.2345	-18.1523	-27.4049		0.2875	-45.9232	-42.944	-46.0155		0.2875	-36.4635	-31.6982	-36.4715
0.2925	-32.223	-17.0461	-28.2852		0.2925	-45.9775	-42.6193	-47.4141		0.2925	-36.4262	-30.3911	-35.9895
0.2975	-29.5506	-18.7944	-28.4895		0.2975	-46.2922	-41.2165	-46.74		0.2975	-34.8411	-32.1891	-36.4671
0.3025	-26.8807	-18.6328	-28.1736		0.3025	-44.3156	-43.2582	-47.543		0.3025	-35.5638	-31.6663	-36.9717
0.3075	-28.8045	-17.6015	-28.6655		0.3075	-45.3299	-42.6147	-47.7648		0.3075	-35.1581	-32.4439	-37.6245
0.3125	-26.5413	-18.7004	-27.4162		0.3125	-44.9714	-42.8833	-48.5519		0.3125	-36.034	-34.0317	-37.2472
0.3175	-29.1763	-20.1291	-26.8716		0.3175	-45.5669	-44.8612	-48.2678		0.3175	-36.5554	-34.3707	-38.2653
0.3225	-24.6731	-17.1209	-28.6365		0.3225	-46.162	-44.6462	-49.3168		0.3225	-35.7115	-35.8464	-38.3613
0.3275	-26.7462	-18.0142	-28.791		0.3275	-45.6626	-46.7714	-49.3494		0.3275	-36.7852	-33.1922	-39.4178
0.3325	-27.5382	-21.436	-30.7515		0.3325	-46.6146	-44.4506	-51.0433		0.3325	-35.1185	-33.7269	-38.9581
0.3375	-25.8863	-20.7474	-28.6664		0.3375	-45.5413	-44.211	-49.5081		0.3375	-38.2387	-33.3465	-38.9216
0.3425	-31.3629	-20.3751	-29.2446		0.3425	-48.7758	-43.8329	-49.8474		0.3425	-38.7871	-34.619	-40.4194
0.3475	-30.7297	-20.7855	-31.3666		0.3475	-48.5636	-45.1167	-51.1594		0.3475	-38.6808	-34.2852	-40.1414
0.3525	-35.1081	-20.7426	-29.9054		0.3525	-48.4705	-45.4315	-50.7148		0.3525	-37.7932	-32.5023	-39.8846
0.3575	-28.1669	-24.4518	-29.9897		0.3575	-47.7275	-43.3597	-50.8125		0.3575	-38.9164	-34.8149	-41.0783
0.3625	-27.9222	-23.0639	-28.5794		0.3625	-48.5857	-45.9016	-52.1804		0.3625	-36.842	-34.827	-41.0485
0.3675	-34.4939	-20.5989	-29.7664		0.3675	-46.888	-45.8305	-52.2409		0.3675	-40.9742	-37.6356	-41.7564
0.3725	-31.7042	-19.4429	-30.2482		0.3725	-50.2686	-48.7994	-52.6924		0.3725	-37.4266	-34.9679	-40.5975
0.3775	-25.8129	-22.2345	-29.4511		0.3775	-47.7503	-45.8607	-51.6892		0.3775	-39.7779	-34.3666	-42.4098
0.3825	-28.606	-21.7865	-30.8403		0.3825	-49.6389	-45.7557	-53.3579		0.3825	-40.7027	-37.2083	-41.9328
0.3875	-35.626	-21.788	-32.3138		0.3875	-51.0207	-48.5262	-52.9113		0.3875	-38.8238	-35.9393	-42.5323
0.3925	-33.2792	-20.8157	-31.0263		0.3925	-48.7909	-47.9413	-53.5822		0.3925	-40.1289	-37.068	-41.5615
0.3975	-36.1981	-22.5383	-32.4107		0.3975	-49.5158	-48.1252	-52.5774		0.3975	-40.6828	-35.1184	-43.8082
0.4025	-30.9712	-21.9191	-31.9685		0.4025	-50.4468	-45.6621	-54.5421		0.4025	-38.5975	-36.436	-42.9381
0.4075	-27.79	-22.2812	-34.8014		0.4075	-48.5201	-47.1411	-54.3745		0.4075	-39.6753	-36.2385	-43.6923
0.4125	-30.9607	-23.2966	-33.6271		0.4125	-49.1661	-47.2237	-54.4076		0.4125	-41.624	-37.3425	-43.9826
0.4175	-37.8098	-26.4965	-35.3913		0.4175	-50.6301	-48.9248	-54.4354		0.4175	-40.7074	-37.774	-45.18
0.4225	-30.6756	-22.8993	-35.1035		0.4225	-51.0588	-48.2319	-56.2873		0.4225	-39.7971	-38.9613	-44.4285
0.4275	-28.5134	-23.9037	-36.3887		0.4275	-50.2167	-48.9265	-54.4842		0.4275	-41.105	-36.8675	-44.5874
0.4325	-38.5288	-22.6532	-34.2228		0.4325	-50.5925	-48.1331	-55.2931		0.4325	-41.558	-38.121	-46.4896
0.4375	-34.3898	-26.2288	-35.1417		0.4375	-50.8543	-49.1723	-57.2398		0.4375	-41.6257	-36.4177	-44.9949
0.4425	-32.461	-25.0347	-32.9688		0.4425	-51.001	-47.5082	-55.9772		0.4425	-42.9005	-41.4331	-46.7994
0.4475	-35.6311	-24.3755	-34.5688		0.4475	-51.7985	-51.5757	-58.0585		0.4475	-43.0313	-37.9053	-45.321
0.4525	-35.1166	-23.6468	-38.1423		0.4525	-54.0127	-48.4423	-56.5104		0.4525	-40.3566	-39.0067	-45.4159
0.4575	-41.7481	-24.7019	-37.6824		0.4575	-50.4374	-49.1125	-56.1958		0.4575	-44.8827	-39.3494	-47.237
0.4625	-35.736	-26.4825	-38.7947		0.4625	-53.5192	-50.1416	-58.2628		0.4625	-42.5134	-37.6841	-46.3343
0.4675	-35.1111	-26.4762	-37.4189		0.4675	-52.6152	-48.5618	-56.8663		0.4675	-43.3616	-40.0154	-48.1483
0.4725	-31.3743	-25.27	-37.2779		0.4725	-53.3287	-50.3053	-58.2759		0.4725	-42.5166	-39.8813	-47.5787
0.4775	-35.1024	-26.3174	-36.0938		0.4775	-53.0044	-50.7144	-58.0798		0.4775	-42.6358	-37.7243	-48.3464
0.4825	-31.3905	-23.9706	-37.5423		0.4825	-53.0132	-48.1853	-58.6441		0.4825	-44.2076	-38.8358	-48.8227
0.4875	-32.9989	-24.4918	-37.4548		0.4875	-53.7024	-50.3803	-60.2049		0.4875	-42.8805	-39.9823	-48.4427
0.4925	-42.6125	-25.9221	-37.4237		0.4925	-52.6911	-50.7291	-59.1988		0.4925	-46.3405	-40.3934	-49.7467
0.4975	-44.0581	-25.6296	-36.7497		0.4975	-55.3727	-51.4283	-60.7247		0.4975	-44.5638	-40.2052	-49.6993
0.5025	-40.5986	-26.3671	-37.8849		0.5025	-54.8074	-51.2768	-60.6462		0.5025	-44.3911	-39.652	-51.3669
0.5075	-39.8088	-25.5516	-38.1416		0.5075	-54.2772	-50.9249	-62.7003		0.5075	-43.4857	-41.2185	-50.3882
0.5125	-35.9145	-27.0508	-41.6416		0.5125	-53.5093	-52.0325	-61.0533		0.5125	-46.9194	-41.28	-48.4888
0.5175	-39.3376	-26.2419	-38.8393		0.5175	-57.1977	-51.9529	-60.0654		0.5175	-46.4291	-43.7934	-51.535
0.5225	-32.0985	-27.8317	-40.3431		0.5225	-55.662	-54.0849	-61.1567		0.5225	-44.828	-38.6946	-52.0396
0.5275	-35.1605	-28.028	-40.5129		0.5275	-54.0636	-50.5617	-63.7862		0.5275	-47.1663	-42.0678	-49.8531
0.5325	-40.0974	-26.8578	-38.6255		0.5325	-57.0765	-52.1665	-61.2058		0.5325	-47.0787	-39.8984	-49.9927
0.5375	-37.4585	-30.7938	-38.8473		0.5375	-56.4577	-50.5794	-60.5267		0.5375	-45.5445	-42.6478	-51.802
0.5425	-33.7129	-30.8874	-39.673		0.5425	-55.7528	-54.1089	-62.8574		0.5425	-45.2546	-39.3801	-52.36
0.5475	-37.5066	-27.3096	-40.4004		0.5475	-55.2822	-50.0693	-62.9233		0.5475	-46.4497	-42.4385	-53.1759
0.5525	-39.8138	-28.0353	-39.8137		0.5525	-55.8101	-53.0478	-63.5654		0.5525	-45.2749	-43.3094	-52.3759
0.5575	-38.4783	-29.4568	-39.5203		0.5575	-54.6699	-53.3048	-62.8507		0.5575	-46.4336	-41.7987	-50.8722
0.5625	-42.1259	-28.4737	-41.6628		0.5625	-56.0688	-52.6468	-62.1556		0.5625	-48.5141	-42.1244	-54.0166
0.5675	-35.5169	-27.7296	-41.7735		0.5675	-58.2235	-52.2527	-65.175		0.5675	-46.3177	-42.2383	-52.8905
0.5725	-36.4579	-29.7564	-41.1185		0.5725	-56.4128	-52.4376	-62.8625		0.5725	-46.6351	-42.8723	-52.1697
0.5775	-39.8607	-30.5281	-43.2505		0.5775	-57.2677	-53.2692	-63.0532		0.5775	-48.1188	-45.0172	-53.0137
0.5825	-41.1949	-28.9673	-41.5852		0.5825	-57.4386	-56.2511	-63.9438		0.5825	-50.0819	-42.7163	-53.7292
0.5875	-41.9322	-29.5119	-41.4196		0.5875	-60.1839	-53.8371	-64.4067		0.5875	-47.086	-42.4447	-54.4262
0.5925	-41.4101	-28.0394	-42.6523		0.5925	-57.0975	-54.1995	-66.1195		0.5925	-48.1132	-45.4718	-54.7084
0.5975	-37.3976	-29.4546	-42.5107		0.5975	-58.1458	-55.0448	-65.0855		0.5975	-46.1793	-43.1641	-55.5652
0.6025	-37.0228	-30.9881	-42.8323		0.6025	-56.6489	-54.1273	-66.022		0.6025	-47.5983	-44.8859	-54.3157
0.6075	-43.9164	-31.1047	-42.6124		0.6075	-57.3843	-55.5916	-64.5669		0.6075	-49.4414	-43.6521	-54.4678
0.6125	-43.8463	-30.3332	-43.6408		0.6125	-58.2829	-54.4354	-66.3755		0.6125	-49.0386	-42.4524	-54.0299
0.6175	-43.8112	-31.2512	-43.9991		0.6175	-59.1505	-53.5952	-63.5443		0.6175	-51.8039	-47.4808	-56.7162
0.6225	-45.2742	-33.5759	-43.8766		0.6225	-59.1312	-57.2187	-67.6447		0.6225	-50.7648	-44.875	-57.0001
0.6275	-43.0602	-29.6823	-43.9054		0.6275	-60.6315	-55.6658	-67.7122		0.6275	-49.1445	-45.0585	-56.3163
0.6325	-41.0507	-31.8636	-45.261		0.6325	-59.0301	-55.6106	-66.924		0.6325	-49.3414	-44.9885	-58.7274
0.6375	-42.7982	-32.1518	-44.6287		0.6375	-58.6659	-55.1179	-69.3622		0.6375	-50.9376	-42.7424	-56.3438
0.6425	-45.5014	-31.6316	-44.0785		0.6425	-61.2415	-54.1769	-67.5426		0.6425	-51.2822	-45.7988	-56.1778
0.6475	-39.0137	-32.6284	-44.8884		0.6475	-60.788	-57.9337	-67.4879		0.6475	-50.7038	-42.8916	-55.1559
0.6525	-40.5827	-31.9019	-46.4473		0.6525	-60.7092	-53.8684	-65.9335		0.6525	-53.699	-46.8527	-57.7318
0.6575	-39.7687	-32.6074	-45.9051		0.6575	-62.2877	-57.2669	-68.7999		0.6575	-50.9893	-46.0197	-60.0185
0.6625	-43.3026	-32.0396	-44.1853		0.6625	-60.6727	-57.3499	-71.0381		0.6625	-50.9226	-45.6849	-58.5866
0.6675	-43.9807	-33.7497	-46.1024		0.6675	-60.0141	-57.8072	-70.1105		0.6675	-50.7428	-44.4937	-57.8581
0.6725	-51.2722	-35.3276	-46.8121		0.6725	-60.3637	-55.35	-67.9772		0.6725	-52.6555	-47.1875	-58.802
0.6775	-41.11	-33.5713	-46.5848		0.6775	-61.8375	-57.6149	-69.2052		0.6775	-51.5026	-46.7706	-57.4707
0.6825	-40.3873	-33.9069	-46.3617		0.6825	-60.8924	-58.3928	-68.2325		0.6825	-56.3211	-45.032	-60.9781
0.6875	-40.3623	-35.8132	-46.7926		0.6875	-65.0279	-56.608	-71.9156		0.6875	-54.4497	-48.4351	-56.7896
0.6925	-41.2443	-34.873	-46.7692		0.6925	-63.3917	-58.3307	-68.7207		0.6925	-54.2469	-45.6438	-56.4583
0.6975	-45.4572	-33.9602	-47.2797		0.6975	-63.581	-57.2289	-67.2627		0.6975	-53.2676	-45.0266	-60.5946
0.7025	-43.6062	-36.4514	-46.3879		0.7025	-62.7064	-56.3774	-71.0425		0.7025	-51.9718	-48.649	-59.9779
0.7075	-50.7892	-35.6342	-47.4861		0.7075	-62.1363	-57.9339	-70.4192		0.7075	-52.892	-45.0124	-58.8502
0.7125	-41.0654	-35.4288	-47.3982		0.7125	-62.7736	-56.7054	-69.0429		0.7125	-55.045	-43.5268	-56.7689
0.7175	-41.3421	-34.05	-46.0995		0.7175	-63.114	-56.2385	-68.1698		0.7175	-53.8942	-46.0106	-60.4749
0.7225	-41.9006	-33.3285	-47.4594		0.7225	-63.5882	-57.9359	-71.3353		0.7225	-52.4349	-45.7253	-58.8805
0.7275	-41.6571	-35.6153	-48.4027		0.7275	-63.3475	-55.8826	-69.2044		0.7275	-52.9859	-47.9405	-60.7767
0.7325	-41.7376	-36.5182	-47.5059		0.7325	-62.6007	-60.6559	-73.3373		0.7325	-51.9288	-48.4837	-62.0059
0.7375	-41.5645	-37.0598	-47.8668		0.7375	-61.4551	-58.7205	-73.5873		0.7375	-53.0716	-48.7744	-63.6247
0.7425	-43.7751	-35.704	-47.1954		0.7425	-64.6093	-59.7447	-75.0115		0.7425	-50.9136	-48.2636	-61.3325
0.7475	-48.5997	-35.7113	-47.1231		0.7475	-61.6646	-59.3375	-72.433		0.7475	-54.8237	-50.2893	-64.2702
0.7525	-43.5372	-35.682	-47.0526		0.7525	-64.4821	-59.7157	-74.5639		0.7525	-54.9773	-49.5587	-62.29
0.7575	-42.7551	-34.8567	-47.8982		0.7575	-64.2979	-58.7947	-72.8		0.7575	-56.6576	-49.1274	-61.2087
0.7625	-44.7009	-37.5795	-49.9246		0.7625	-65.9411	-60.2692	-72.6004		0.7625	-54.1537	-50.858	-61.7924
0.7675	-44.7037	-36.0864	-48.3271		0.7675	-64.5597	-61.9092	-74.307		0.7675	-54.1741	-49.2465	-62.754
0.7725	-43.6624	-36.2489	-47.817		0.7725	-65.2967	-61.9539	-75.8675		0.7725	-57.762	-48.714	-61.8947
0.7775	-44.2805	-37.0555	-48.4053		0.7775	-66.4407	-59.6149	-72.8312		0.7775	-56.0045	-50.316	-63.6307
0.7825	-40.2527	-37.9574	-49.1238		0.7825	-65.2102	-61.1073	-75.9154		0.7825	-58.3321	-51.2686	-63.7448
0.7875	-43.9279	-38.7611	-48.7877		0.7875	-68.3846	-60.287	-73.7727		0.7875	-56.6429	-53.1375	-66.9867
0.7925	-44.7864	-37.5799	-49.3918		0.7925	-66.4271	-64.1306	-78.1688		0.7925	-55.4853	-50.1393	-64.4133
0.7975	-41.2198	-39.5313	-49.1944		0.7975	-66.2822	-60.9592	-75.2181		0.7975	-56.5511	-50.2167	-62.4941
0.8025	-40.95	-37.3606	-48.6867		0.8025	-66.2453	-61.8246	-75.6206		0.8025	-60.208	-49.3448	-61.9649
0.8075	-46.9155	-38.6458	-48.2676		0.8075	-69.324	-60.2653	-72.6157		0.8075	-56.8287	-51.4574	-64.4056
0.8125	-55.1085	-36.5355	-49.8289		0.8125	-66.9557	-61.5445	-74.0416		0.8125	-59.5375	-50.9019	-63.6622
0.8175	-45.6532	-35.0016	-50.842		0.8175	-69.4191	-61.0058	-73.8381		0.8175	-55.3744	-52.8479	-66.9103
0.8225	-48.0395	-37.5487	-50.0285		0.8225	-66.5798	-63.7701	-75.8757		0.8225	-57.1629	-52.9013	-65.1897
0.8275	-48.054	-38.7724	-49.3641		0.8275	-66.6376	-64.7548	-77.3208		0.8275	-60.8445	-51.2129	-64.8364
0.8325	-46.801	-38.7446	-49.1298		0.8325	-69.5189	-64.1129	-77.3739		0.8325	-58.2034	-53.251	-66.2907
0.8375	-48.9844	-39.5091	-49.8951		0.8375	-67.7286	-63.1579	-77.227		0.8375	-59.4641	-48.5885	-63.9916
0.8425	-49.2389	-39.3953	-49.9137		0.8425	-67.9658	-59.388	-74.8675		0.8425	-59.6059	-51.4595	-64.2763
0.8475	-46.1106	-41.8366	-50.1028		0.8475	-69.2695	-62.379	-74.9428		0.8475	-58.626	-51.4153	-68.5308
0.8525	-48.5971	-40.5396	-49.5831		0.8525	-68.9738	-62.9958	-79.4698		0.8525	-60.361	-54.6217	-68.8374
0.8575	-48.4514	-39.5539	-50.7294		0.8575	-70.6747	-68.2058	-79.6786		0.8575	-61.446	-53.1846	-66.4532
0.8625	-54.4868	-39.4741	-50.6369		0.8625	-70.2185	-64.4293	-77.4102		0.8625	-61.3875	-52.8504	-64.9945
0.8675	-50.5111	-39.9274	-49.3845		0.8675	-71.6862	-63.4412	-76.9244		0.8675	-59.6042	-53.0219	-65.3444
0.8725	-42.8299	-39.4295	-50.8081		0.8725	-70.452	-64.4123	-76.4731		0.8725	-61.7834	-54.6154	-68.967
0.8775	-46.8029	-41.4916	-49.9399		0.8775	-71.4962	-63.688	-78.4565		0.8775	-62.9182	-52.3582	-63.7214
0.8825	-45.2067	-41.3831	-49.7617		0.8825	-72.3301	-63.7222	-75.4104		0.8825	-63.7342	-52.394	-66.3996
0.8875	-43.0581	-42.6449	-51.2424		0.8875	-72.3837	-63.0585	-77.6761		0.8875	-66.1504	-53.7599	-69.0172
0.8925	-42.9498	-42.0153	-49.9888		0.8925	-76.042	-64.6858	-79.2565		0.8925	-60.8838	-55.0846	-67.8014
0.8975	-58.4987	-40.2411	-50.8108		0.8975	-70.6302	-63.8509	-76.2531		0.8975	-64.2556	-51.3769	-65.8234
0.9025	-51.3869	-41.2678	-49.9029		0.9025	-74.7549	-62.2673	-75.7588		0.9025	-63.1915	-56.0979	-69.5574
0.9075	-42.9577	-41.3287	-49.8162		0.9075	-73.8762	-65.9088	-79.4737		0.9075	-61.9413	-54.9828	-67.6208
0.9125	-49.9227	-43.5225	-50.5703		0.9125	-71.8624	-66.0187	-79.4987		0.9125	-61.2842	-55.4646	-68.0636
0.9175	-53.6715	-41.6295	-51.2385		0.9175	-70.9546	-67.7083	-78.554		0.9175	-63.6868	-54.8019	-69.4785
0.9225	-47.1811	-41.146	-50.6098		0.9225	-73.4553	-66.1232	-81.595		0.9225	-64.3892	-53.3339	-67.5668
0.9275	-42.2688	-41.1423	-49.9861		0.9275	-73.0104	-64.2292	-79.8111		0.9275	-64.6174	-54.439	-68.14
0.9325	-45.9478	-42.5606	-49.8702		0.9325	-74.5543	-66.1548	-79.4311		0.9325	-62.6719	-55.5801	-70.3069
0.9375	-54.3843	-42.4778	-50.565		0.9375	-73.4261	-66.8424	-81.3207		0.9375	-64.2625	-57.9021	-68.8284
0.9425	-46.6565	-41.7041	-50.5998		0.9425	-73.9958	-67.3289	-78.8744		0.9425	-70.7315	-56.0093	-70.3694
0.9475	-48.7046	-41.8605	-50.439		0.9475	-80.2896	-66.45	-80.1015		0.9475	-64.0881	-56.3214	-70.1255
0.9525	-46.028	-42.8428	-50.6987		0.9525	-74.2023	-68.4405	-83.165		0.9525	-68.5231	-53.9211	-68.5484
0.9575	-48.8343	-42.4461	-50.3275		0.9575	-78.2355	-65.0307	-79.3683		0.9575	-64.7749	-56.3199	-70.1125
0.9625	-46.4	-40.2043	-49.866		0.9625	-75.6639	-67.8684	-81.2612		0.9625	-66.342	-57.8459	-69.0449
0.9675	-44.3742	-42.8236	-51.3412		0.9675	-75.1345	-68.6726	-79.9019		0.9675	-65.1995	-58.9111	-72.1532
0.9725	-46.1592	-41.8448	-50.9102		0.9725	-74.4864	-70.6135	-84.0268		0.9725	-67.8873	-57.9382	-72.1807
0.9775	-46.6226	-43.1918	-50.6309		0.9775	-77.4142	-70.0555	-83.7953		0.9775	-72.499	-60.7499	-72.2798
0.9825	-44.7492	-43.976	-49.9671		0.9825	-81.4878	-71.3015	-82.8685		0.9825	-68.8124	-58.0047	-72.0516
0.9875	-48.5596	-41.6983	-50.6716		0.9875	-78.2988	-69.2865	-80.9941		0.9875	-65.892	-54.9366	-71.7094
0.9925	-45.9507	-42.5953	-49.9409		0.9925	-76.5231	-66.6718	-82.2044		0.9925	-65.7463	-58.1912	-71.4992
0.9975	-47.6762	-41.9955	-50.0236		0.9975	-76.7426	-69.8993	-83.5447		0.9975	-68.2406	-60.5802	-76.8281
1.0025	-48.4897	-41.5562	-50.5707		1.0025	-77.1519	-71.1382	-87.1167		1.0025	-64.9483	-58.1831	-70.6633
1.0075	-50.8403	-42.5348	-50.5627		1.0075	-74.7106	-69.8535	-81.9544		1.0075	-66.134	-58.3742	-72.0893
1.0125	-48.3306	-41.9638	-50.5735		1.0125	-74.9294	-69.301	-82.8422		1.0125	-69.73	-58.8757	-71.6932
1.0175	-54.0293	-43.1278	-51.1532		1.0175	-77.6632	-70.7328	-82.8015		1.0175	-69.7036	-60.4262	-73.1253
1.0225	-48.0746	-41.8747	-50.5245		1.0225	-79.4915	-71.9894	-84.7448		1.0225	-69.3832	-59.2941	-70.2489
1.0275	-46.0528	-44.2064	-50.572		1.0275	-77.7223	-68.8458	-80.8115		1.0275	-72.4246	-60.7567	-75.3253
1.0325	-55.6712	-41.107	-50.3548		1.0325	-79.7924	-70.0098	-82.4234		1.0325	-69.0832	-57.8975	-72.2854
1.0375	-43.953	-44.4126	-52.0155		1.0375	-79.0636	-69.2068	-83.9753		1.0375	-69.8517	-60.9965	-73.0485
1.0425	-379.298	-379.298	-379.298		1.0425	-77.9801	-70.4876	-83.3526		1.0425	-69.9654	-56.1673	-70.1062
1.0475	-379.298	-379.298	-379.298		1.0475	-79.3331	-68.0192	-82.8637		1.0475	-68.4871	-60.4283	-74.2678
1.0525	-379.298	-379.298	-379.298		1.0525	-78.2964	-71.0065	-86.0628		1.0525	-69.5779	-60.6118	-74.474
1.0575	-379.298	-379.298	-379.298		1.0575	-79.7566	-71.7993	-85.213		1.0575	-68.5841	-60.1379	-72.8943
1.0625	-379.298	-379.298	-379.298		1.0625	-78.3634	-69.9433	-84.1068		1.0625	-70.9872	-61.9193	-74.4744
1.0675	-379.298	-379.298	-379.298		1.0675	-80.4288	-70.4317	-82.931		1.0675	-69.2416	-61.9702	-78.4388
1.0725	-379.298	-379.298	-379.298		1.0725	-80.0005	-73.0838	-87.4287		1.0725	-70.1779	-57.8993	-72.5499
1.0775	-379.298	-379.298	-379.298		1.0775	-79.4485	-69.083	-82.6662		1.0775	-71.2538	-59.3103	-72.1188
1.0825	-379.298	-379.298	-379.298		1.0825	-80.9261	-70.2263	-82.9985		1.0825	-68.1321	-59.1727	-74.4411
1.0875	-379.298	-379.298	-379.298		1.0875	-78.5976	-72.6093	-86.6702		1.0875	-69.2701	-59.6799	-72.3669
1.0925	-379.298	-379.298	-379.298		1.0925	-79.9035	-70.085	-84.1733		1.0925	-70.1227	-61.1901	-74.2355
1.0975	-379.298	-379.298	-379.298		1.0975	-81.4768	-72.0195	-84.9052		1.0975	-72.764	-60.0986	-73.7554
1.1025	-379.298	-379.298	-379.298		1.1025	-82.8705	-72.0174	-85.2316		1.1025	-71.4892	-61.5499	-74.0717
1.1075	-379.298	-379.298	-379.298		1.1075	-81.8975	-72.825	-85.1467		1.1075	-69.4577	-64.7134	-79.4674
1.1125	-379.298	-379.298	-379.298		1.1125	-78.854	-74.0979	-88.6781		1.1125	-72.415	-62.258	-76.4584
1.1175	-379.298	-379.298	-379.298		1.1175	-82.4102	-73.5511	-87.2232		1.1175	-71.7259	-62.5579	-77.4123
1.1225	-379.298	-379.298	-379.298		1.1225	-81.4535	-73.4101	-87.5815		1.1225	-72.0997	-64.4212	-80.4663
1.1275	-379.298	-379.298	-379.298		1.1275	-82.1217	-73.9842	-91.3986		1.1275	-74.8711	-63.2386	-76.9804
1.1325	-379.298	-379.298	-379.298		1.1325	-84.237	-75.0479	-88.6196		1.1325	-72.6829	-62.8626	-77.7055
1.1375	-379.298	-379.298	-379.298		1.1375	-82.4088	-72.9569	-88.1834		1.1375	-75.5803	-63.5435	-75.2902
1.1425	-379.298	-379.298	-379.298		1.1425	-83.2806	-75.9399	-90.7166		1.1425	-74.8273	-61.6088	-78.0247
1.1475	-379.298	-379.298	-379.298		1.1475	-84.1164	-72.4047	-88.3293		1.1475	-73.7375	-66.4182	-78.2928
1.1525	-379.298	-379.298	-379.298		1.1525	-82.3485	-76.9789	-89.3291		1.1525	-74.9434	-66.3093	-80.363
1.1575	-379.298	-379.298	-379.298		1.1575	-83.3325	-76.5999	-90.6699		1.1575	-76.5353	-66.9324	-80.1457
1.1625	-379.298	-379.298	-379.298		1.1625	-86.6628	-77.4186	-91.734		1.1625	-78.1138	-65.5465	-77.1247
1.1675	-379.298	-379.298	-379.298		1.1675	-85.6373	-75.2726	-86.7457		1.1675	-75.8484	-65.8916	-78.7579
1.1725	-379.298	-379.298	-379.298		1.1725	-85.7326	-78.0876	-91.4984		1.1725	-74.6088	-63.6451	-79.3357
1.1775	-379.298	-379.298	-379.298		1.1775	-84.7282	-75.3725	-91.4676		1.1775	-77.4912	-68.3503	-81.2653
1.1825	-379.298	-379.298	-379.298		1.1825	-85.5441	-78.2302	-90.8326		1.1825	-82.2698	-66.0432	-79.9958
1.1875	-379.298	-379.298	-379.298		1.1875	-89.1746	-76.008	-90.2951		1.1875	-79.5196	-68.4311	-81.7239
1.1925	-379.298	-379.298	-379.298		1.1925	-87.5793	-78.2847	-91.7038		1.1925	-77.3548	-65.6394	-81.0792
1.1975	-379.298	-379.298	-379.298		1.1975	-86.5496	-77.114	-91.4404		1.1975	-77.911	-66.4668	-78.1586
1.2025	-379.298	-379.298	-379.298		1.2025	-86.92	-77.1323	-88.5964		1.2025	-80.786	-67.4218	-84.1242
1.2075	-379.298	-379.298	-379.298		1.2075	-88.4267	-79.5571	-94.296		1.2075	-78.0464	-67.8209	-80.6212
1.2125	-379.298	-379.298	-379.298		1.2125	-87.6104	-80.4951	-92.1653		1.2125	-77.346	-62.1228	-76.4017
1.2175	-379.298	-379.298	-379.298		1.2175	-87.4407	-73.0998	-86.315		1.2175	-75.7046	-64.3931	-78.4377
1.2225	-379.298	-379.298	-379.298		1.2225	-85.6171	-77.0522	-90.8256		1.2225	-81.8391	-65.5866	-78.9568
1.2275	-379.298	-379.298	-379.298		1.2275	-89.4145	-79.725	-92.0434		1.2275	-79.7782	-64.1771	-75.5562
1.2325	-379.298	-379.298	-379.298		1.2325	-91.7535	-74.7577	-86.0646		1.2325	-76.8502	-66.1109	-77.6017
1.2375	-379.298	-379.298	-379.298		1.2375	-88.7869	-76.7448	-87.3645		1.2375	-74.4203	-67.3346	-79.559
1.2425	-379.298	-379.298	-379.298		1.2425	-85.8739	-76.872	-90.7851		1.2425	-76.0608	-65.5064	-80.9383
1.2475	-379.298	-379.298	-379.298		1.2475	-85.1968	-78.7704	-93.0633		1.2475	-79.5795	-65.9473	-79.3836
					1.2525	-91.103	-78.5827	-91.0471		1.2525	-77.8156	-67.0643	-79.61
					1.2575	-87.4163	-77.4113	-90.3555		1.2575	-74.5576	-72.0937	-86.6145
					1.2625	-85.3687	-81.9811	-94.8891		1.2625	-80.4064	-69.5575	-82.5957
					1.2675	-88.9668	-79.6049	-92.7272		1.2675	-78.1334	-73.5504	-84.943
					1.2725	-86.3199	-83.5391	-95.0094		1.2725	-79.6461	-65.9429	-79.8827
					1.2775	-87.4253	-76.3217	-91.8292		1.2775	-80.5463	-66.9528	-81.9865
					1.2825	-88.9634	-77.9483	-94.0843		1.2825	-77.4193	-68.4677	-85.8195
					1.2875	-87.8233	-79.5445	-96.3828		1.2875	-78.3236	-70.5896	-83.1772
					1.2925	-88.2406	-81.6273	-93.4322		1.2925	-79.4951	-65.4797	-81.2781
					1.2975	-89.319	-80.9914	-93.5513		1.2975	-80.9298	-70.6816	-84.6418
					1.3025	-89.1834	-81.8648	-97.1226		1.3025	-79.2505	-67.737	-82.0843
					1.3075	-89.3619	-79.4164	-93.1432		1.3075	-78.5106	-70.0528	-83.2473
					1.3125	-88.9987	-81.1762	-94.0182		1.3125	-79.6549	-71.338	-86.6852
					1.3175	-89.6046	-81.5836	-95.554		1.3175	-81.9908	-72.9166	-83.6055
					1.3225	-90.5351	-83.7861	-94.5526		1.3225	-82.2857	-70.956	-87.0949
					1.3275	-91.4893	-80.3146	-93.4871		1.3275	-82.6436	-76.2434	-88.6153
					1.3325	-91.1068	-87.2529	-100.264		1.3325	-80.1523	-66.8485	-81.5619
					1.3375	-89.6773	-77.2321	-91.7827		1.3375	-80.3327	-69.4757	-82.8497
					1.3425	-89.6573	-80.6358	-93.5026		1.3425	-86.3115	-74.2281	-86.9955
					1.3475	-94.4992	-84.4728	-95.6919		1.3475	-84.5815	-70.7189	-84.3645
					1.3525	-92.8886	-82.3267	-94.0315		1.3525	-82.2906	-71.3388	-82.4358
					1.3575	-91.6096	-86.5868	-97.8804		1.3575	-83.0275	-69.6273	-85.2694
					1.3625	-92.0985	-81.2991	-95.6631		1.3625	-86.7439	-73.9737	-86.9106
					1.3675	-96.4045	-83.9428	-98.3326		1.3675	-83.8344	-68.5584	-82.8019
					1.3725	-92.9177	-79.2831	-93.2972		1.3725	-81.0793	-71.1167	-83.738
					1.3775	-92.1951	-81.1434	-94.5067		1.3775	-82.0494	-73.7396	-87.1564
					1.3825	-92.0123	-85.6568	-99.1044		1.3825	-82.3539	-72.661	-86.7688
					1.3875	-92.4244	-84.826	-98.0735		1.3875	-83.4388	-70.8895	-86.2635
					1.3925	-91.9508	-81.3978	-96.3334		1.3925	-82.2259	-71.6255	-85.4182
					1.3975	-92.6271	-82.8953	-97.2778		1.3975	-85.6969	-73.2315	-86.7711
					1.4025	-94.9572	-85.8282	-101.01		1.4025	-84.8115	-77.089	-91.0739
					1.4075	-94.466	-87.3571	-102.042		1.4075	-85.3742	-69.3511	-83.5921
					1.4125	-95.5744	-81.0662	-94.2718		1.4125	-83.4185	-77.2924	-90.3044
					1.4175	-93.0906	-87.3931	-100.268		1.4175	-88.0986	-70.3576	-84.5843
					1.4225	-97.2307	-88.4139	-100.586		1.4225	-85.2273	-72.9438	-87.1397
					1.4275	-96.4893	-86.9228	-99.3482		1.4275	-87.5244	-72.5414	-84.6844
					1.4325	-95.981	-83.8327	-95.6553		1.4325	-88.4271	-77.0474	-88.7248
					1.4375	-98.1537	-89.3394	-101.225		1.4375	-86.0452	-77.2511	-89.1598
					1.4425	-95.2454	-85.0203	-97.1877		1.4425	-88.3265	-73.6506	-87.7267
					1.4475	-95.4906	-83.368	-97.5128		1.4475	-85.2798	-69.9876	-83.9531
					1.4525	-94.1152	-89.5042	-106.049		1.4525	-88.2684	-78.8361	-92.5736
					1.4575	-99.2484	-90.0383	-103.196		1.4575	-86.8097	-74.7905	-92.0557
					1.4625	-97.3661	-84.5689	-101.856		1.4625	-85.413	-75.5403	-87.1122
					1.4675	-96.1166	-86.9612	-98.5827		1.4675	-86.0379	-80.3368	-95.8329
					1.4725	-96.4688	-90.3355	-103.859		1.4725	-88.0699	-76.746	-93.5883
					1.4775	-97.4814	-87.0626	-103.83		1.4775	-88.5836	-80.6535	-95.1915
					1.4825	-99.257	-90.0701	-103.166		1.4825	-88.7189	-79.6714	-93.2704
					1.4875	-98.8146	-85.1154	-98.6816		1.4875	-88.3088	-79.4057	-91.6596
					1.4925	-97.9936	-89.4447	-101.094		1.4925	-90.8419	-80.0175	-90.7233
					1.4975	-99.7895	-92.2607	-104.244		1.4975	-88.8089	-75.408	-88.4534
					1.5025	-100.333	-87.4296	-100.8		1.5025	-89.9366	-77.5656	-91.5307
					1.5075	-100.516	-89.1559	-103.27		1.5075	-86.9763	-82.2396	-94.8375
					1.5125	-97.5401	-94.5599	-106.782		1.5125	-89.8631	-80.3664	-92.0294
					1.5175	-100.429	-94.8571	-110.471		1.5175	-88.9542	-77.8833	-93.8917
					1.5225	-99.417	-89.0329	-105.949		1.5225	-88.5753	-78.1355	-90.8014
					1.5275	-99.5272	-86.1853	-99.5697		1.5275	-92.3558	-85.5505	-100.108
					1.5325	-101.027	-94.2761	-111.048		1.5325	-92.8589	-73.5312	-87.0361
					1.5375	-102.349	-84.5071	-97.0629		1.5375	-90.8292	-82.8847	-95.7514
					1.5425	-100.306	-91.629	-105.101		1.5425	-90.5696	-80.7587	-89.5208
					1.5475	-100.582	-91.4934	-101.699		1.5475	-95.2608	-78.2175	-89.6279
					1.5525	-104.586	-89.0178	-102.495		1.5525	-92.4201	-81.0945	-94.773
					1.5575	-101.261	-92.3137	-105.903		1.5575	-89.8528	-83.2868	-95.3654
					1.5625	-100.643	-94.168	-106.505		1.5625	-91.1984	-78.2414	-93.1504
					1.5675	-101.166	-88.9245	-103.49		1.5675	-92.8943	-81.7562	-93.8692
					1.5725	-102.189	-92.8723	-104.981		1.5725	-93.5518	-78.8435	-92.3128
					1.5775	-103.376	-90.1559	-103.501		1.5775	-94.4333	-79.2435	-92.2155
					1.5825	-105.036	-97.0894	-108.257		1.5825	-94.1994	-79.1312	-91.7078
					1.5875	-104.14	-90.8371	-103.185		1.5875	-96.1734	-76.4562	-91.2645
					1.5925	-106.726	-87.874	-101.831		1.5925	-91.7962	-83.6855	-97.1448
					1.5975	-101.937	-98.3869	-110.26		1.5975	-95.6391	-85.2451	-99.6305
					1.6025	-104.657	-98.8494	-112.181		1.6025	-97.7512	-91.0562	-102.889
					1.6075	-106.474	-100.451	-114.164		1.6075	-95.4508	-79.0165	-87.4032
					1.6125	-104.547	-90.1478	-98.4177		1.6125	-96.4734	-76.4912	-87.7558
					1.6175	-105.504	-89.4239	-102.722		1.6175	-95.6276	-76.6532	-92.0719
					1.6225	-106.327	-92.7153	-106.59		1.6225	-93.4613	-85.7011	-96.8442
					1.6275	-104.19	-98.3177	-108.248		1.6275	-94.9513	-84.8417	-97.6557
					1.6325	-104.353	-96.2906	-108.74		1.6325	-95.8735	-83.8763	-95.4512
					1.6375	-105.297	-94.802	-107.657		1.6375	-96.863	-87.106	-98.9871
					1.6425	-105.283	-98.4067	-110.85		1.6425	-101.107	-95.9815	-109.089
					1.6475	-108.532	-105.557	-119.447		1.6475	-98.1416	-86.5665	-101.979
					1.6525	-107.776	-98.4647	-112.463		1.6525	-97.6587	-89.5525	-102.997
					1.6575	-107.286	-97.8138	-113.318		1.6575	-97.683	-89.141	-103.777
					1.6625	-107.291	-99.6863	-114.127		1.6625	-98.3249	-86.0764	-97.1354
					1.6675	-107.722	-96.7576	-108.355		1.6675	-96.807	-96.7787	-112.131
					1.6725	-107.378	-105.777	-126.601		1.6725	-102.051	-83.6268	-96.9802
					1.6775	-111.324	-100.737	-114.22		1.6775	-99.9333	-92.1526	-105.255
					1.6825	-110.464	-104.863	-116.197		1.6825	-102.212	-92.3923	-105.502
					1.6875	-112.285	-102.544	-115.064		1.6875	-101.636	-96.7803	-112.576
					1.6925	-113.261	-99.6395	-113.276		1.6925	-101.526	-84.0081	-96.3751
					1.6975	-111.868	-94.3547	-106.78		1.6975	-101.704	-93.853	-108.857
					1.7025	-113.193	-98.7213	-113.136		1.7025	-102.383	-90.7489	-106.006
					1.7075	-108.345	-102.798	-118.762		1.7075	-104.325	-94.0527	-105.863
					1.7125	-123.961	-104.424	-116.729		1.7125	-109.371	-88.5605	-102.571
					1.7175	-121.498	-99.1842	-114.28		1.7175	-106.938	-86.6693	-99.0995
					1.7225	-119.487	-101.556	-113.54		1.7225	-106.689	-83.7026	-96.9443
					1.7275	-119.43	-99.6992	-112.963		1.7275	-106.658	-86.8066	-100.788
					1.7325	-121.929	-100.442	-113.87		1.7325	-108.415	-93.1957	-107.443
					1.7375	-118.909	-106.064	-120.175		1.7375	-105.576	-95.0398	-109.14
					1.7425	-116.615	-105.968	-120.198		1.7425	-106.854	-95.5936	-105.758
					1.7475	-115.342	-105.114	-116.477		1.7475	-102.557	-95.1825	-107.482
					1.7525	-112.914	-111.38	-124.481		1.7525	-102.371	-87.098	-103.318
					1.7575	-111.921	-97.6863	-111.313		1.7575	-99.7306	-90.8387	-105.072
					1.7625	-109.469	-106.862	-121.916		1.7625	-100.748	-100.424	-113.457
					1.7675	-109.636	-108.965	-122.335		1.7675	-99.5449	-93.7648	-107.204
					1.7725	-109.189	-106.557	-118.91		1.7725	-99.9256	-89.8497	-104.207
					1.7775	-107.355	-100.632	-114.936		1.7775	-99.7598	-90.2187	-103.386
					1.7825	-108.928	-105.8	-119.097		1.7825	-97.4037	-99.0411	-113.508
					1.7875	-107.997	-110.41	-125.215		1.7875	-97.6832	-99.7357	-108.674
					1.7925	-107.028	-110.444	-124.382		1.7925	-97.0485	-86.0028	-100.482
					1.7975	-106.417	-97.8471	-111.756		1.7975	-97.5188	-102.272	-116.516
					1.8025	-106.449	-114	-127.881		1.8025	-96.3174	-105.678	-119.447
					1.8075	-105.466	-116.321	-130.329		1.8075	-96.1677	-94.4617	-106.929
					1.8125	-105.247	-106.206	-120.635		1.8125	-95.4827	-94.5759	-107.69
					1.8175	-104.733	-108.225	-122.429		1.8175	-96.0717	-98.6956	-116.38
					1.8225	-105.108	-105.479	-119.662		1.8225	-95.3287	-102.886	-113.667
					1.8275	-104.096	-109.293	-123.644		1.8275	-95.4568	-98.169	-109.969
					1.8325	-104.443	-109.003	-121.057		1.8325	-95.4391	-99.6863	-113.487
					1.8375	-104.674	-114.789	-130.49		1.8375	-95.8583	-100.185	-111.775
					1.8425	-104.694	-105.596	-116.423		1.8425	-95.4048	-93.0925	-106.436
					1.8475	-104.529	-103.898	-116.756		1.8475	-95.4179	-91.7595	-104.12
					1.8525	-104.027	-107.104	-119.077		1.8525	-95.3633	-100.071	-115.958
					1.8575	-104.235	-111.715	-127.263		1.8575	-95.3877	-105.277	-119.43
					1.8625	-104.004	-115.854	-131.238		1.8625	-95.7288	-108.122	-122.262
					1.8675	-104.361	-118.052	-131.341		1.8675	-95.9537	-98.8408	-113.083
					1.8725	-104.423	-111.543	-124.574		1.8725	-95.8571	-104.885	-118.3
					1.8775	-104.579	-116.823	-129.177		1.8775	-96.1276	-109.077	-122.518
					1.8825	-104.602	-121.079	-134.444		1.8825	-96.0971	-125.623	-148.85
					1.8875	-104.636	-135.18	-155.702		1.8875	-96.5057	-103.944	-115.823
					1.8925	-105.011	-107.869	-119.852		1.8925	-96.6128	-103.808	-118.696
					1.8975	-105.062	-113.537	-129.885		1.8975	-96.6743	-101.662	-114.056
					1.9025	-105.276	-117.367	-130.519		1.9025	-96.777	-113.033	-125.079
					1.9075	-105.17	-113.853	-125.838		1.9075	-96.7533	-93.4882	-110.504
					1.9125	-105.264	-104.217	-121.219		1.9125	-96.8885	-107.298	-117.657
					1.9175	-105.155	-121.907	-136.877		1.9175	-96.8391	-110.13	-122.795
					1.9225	-105.226	-120.231	-132.786		1.9225	-96.7509	-115.305	-124.962
					1.9275	-105.265	-113.24	-126.847		1.9275	-96.6983	-103.085	-115.986
					1.9325	-105.284	-114.09	-127.084		1.9325	-96.5957	-106.619	-121.713
					1.9375	-105.184	-117.592	-132.717		1.9375	-96.4312	-115.83	-135.009
					1.9425	-104.991	-126.967	-146.005		1.9425	-96.2948	-109.73	-112.155
					1.9475	-104.881	-120.722	-123.151		1.9475	-95.9906	-94.9325	-110.239
					1.9525	-104.623	-105.925	-121.23		1.9525	-95.8424	-118.435	-135.938
					1.9575	-104.472	-130.781	-156.462		1.9575	-95.4753	-130.27	-144.417
					1.9625	-104.164	-140.809	-155.279		1.9625	-95.1601	-100.506	-113.437
					1.9675	-103.881	-111.614	-124.545		1.9675	-94.8782	-108.287	-129.301
					1.9725	-103.621	-119.24	-140.29		1.9725	-94.7132	-109.967	-122.792
					1.9775	-103.452	-124.923	-137.831		1.9775	-94.4252	-108.442	-121.518
					1.9825	-103.204	-121.942	-135.01		1.9825	-94.126	-133.621	-148.105
					1.9875	-102.936	-137.29	-153.358		1.9875	-93.9332	-112.854	-125.594
					1.9925	-102.739	-123.803	-136.577		1.9925	-93.6921	-113.368	-126.693
					1.9975	-102.511	-123.451	-136.666		1.9975	-93.5	-121.622	-135.178
					2.0025	-102.341	-132.44	-146.149		2.0025	-93.2743	-117.566	-127.329
					2.0075	-102.122	-132.406	-144.315		2.0075	-93.0593	-116.257	-129.41
					2.0125	-101.934	-129.052	-142.162		2.0125	-92.8676	-107.378	-120.277
					2.0175	-101.758	-118.403	-131.298		2.0175	-92.7398	-115.508	-127.582
					2.0225	-101.61	-126.588	-138.783		2.0225	-92.5592	-119.722	-132.753
					2.0275	-101.446	-130.768	-143.765		2.0275	-92.41	-131.617	-146.187
					2.0325	-101.315	-146.688	-161.707		2.0325	-92.235	-113.537	-126.589
					2.0375	-101.149	-124.544	-137.574		2.0375	-92.0882	-125.668	-129.903
					2.0425	-101.029	-120.689	-133.19		2.0425	-91.9907	-110.276	-124.849
					2.0475	-100.918	-122.751	-133.265		2.0475	-91.9147	-114.109	-127.381
					2.0525	-100.815	-125.065	-138.376		2.0525	-91.7666	-135.393	-163.377
					2.0575	-100.689	-149.422	-169.195		2.0575	-91.6993	-120.721	-133.762
					2.0625	-100.633	-131.72	-144.74		2.0625	-91.5832	-129.241	-132.653
					2.0675	-100.524	-140.24	-143.588		2.0675	-91.5349	-110.031	-123.415
					2.0725	-100.474	-121.022	-134.405		2.0725	-91.4688	-139.424	-164.724
					2.0775	-100.4	-150.319	-167.316		2.0775	-91.4064	-98.4436	-111.284
					2.0825	-100.335	-128.246	-140.579		2.0825	-91.3188	-121.917	-141.253
					2.0875	-100.249	-131.021	-144.564		2.0875	-91.2589	-137.769	-164.938
					2.0925	-100.205	-143.216	-165.621		2.0925	-91.2081	-111.491	-124.343
					2.0975	-100.133	-122.484	-135.325		2.0975	-91.19	-112.405	-125.293
					2.1025	-100.1	-123.402	-136.279		2.1025	-91.1217	-137.94	-164.367
					2.1075	-100.026	-149.036	-168.57		2.1075	-91.0944	-109.904	-122.635
					2.1125	-99.9931	-120.897	-133.621		2.1125	-91.0231	-127.379	-163.285
					2.1175	-99.9182	-138.364	-166.032		2.1175	-90.981	-143.473	-164.196
					2.1225	-99.8756	-154.379	-169.35		2.1225	-90.9166	-153.166	-165.348
					2.1275	-99.8073	-163.453	-168.402		2.1275	-90.9005	-112.958	-125.71
					2.1325	-99.7873	-167.925	-167.248		2.1325	-93.0533	-148.236	-167.965
					2.1375	-101.933	-170.362	-173.351		2.1375	-379.298	-379.298	-379.298

## Sheet: IR4
Measured					Old					New
Bands	63	1000	16000		Bands	63	1000	16000		Bands	63	1000	16000
RT60	1.26377	1.53614	1.07605		RT60	1.40602	1.59901	0.853925		RT60	1.50232	1.61876	0.859165
EDT	0	0	0		EDT	0	0	0		EDT	0	0	0
DRR	-41.9749	-3.94647	-4.49499		DRR	-19.9493	5.51773	8.24743		DRR	-27.9515	-4.99335	-2.77239
C50	6.56585	5.32165	3.65233		C50	5.45297	13.6977	18.439		C50	5.10283	7.20382	11.2181
C80	7.47273	6.69294	5.95668		C80	7.56424	15.3147	20.9512		C80	7.27364	8.99613	13.8556
D50	81.9334	77.3004	69.8672		D50	77.8267	95.9067	98.5877		D50	76.4042	84.0069	92.9764
TS	0.034044	0.041236	0.048751		TS	0.045132	0.008874	0.003085		TS	0.050529	0.033273	0.014926
Bands	63	1000	16000		Bands	63	1000	16000		Bands	63	1000	16000
0.0025	-23.3134	6.44627	-1.97451		0.0025	-34.0208	-7.53898	-1.16103		0.0025	-20.6032	-16.4449	-3.70131
0.0075	1.54074	3.31316	-8.18927		0.0075	-20.1306	-21.4301	-14.69		0.0075	-21.2604	-5.57277	-4.06434
0.0125	3.57695	0.184193	-9.61509		0.0125	-30.9588	-16.4975	-15.1142		0.0125	-9.95844	-12.7379	-6.19348
0.0175	-3.80502	-2.14729	-8.2258		0.0175	-21.864	-23.7741	-17.2081		0.0175	-12.2459	-17.5449	-11.439
0.0225	-5.58252	-4.4072	-13.2542		0.0225	-23.6354	-28.5126	-22.513		0.0225	-14.6257	-16.4933	-13.189
0.0275	-6.79491	-5.64851	-9.82104		0.0275	-25.4899	-27.6673	-24.5474		0.0275	-18.1854	-18.8787	-15.2218
0.0325	-13.097	-6.88367	-10.0952		0.0325	-28.925	-30.1273	-25.8966		0.0325	-16.8939	-21.3288	-15.503
0.0375	-9.30434	-5.279	-8.71753		0.0375	-27.6066	-32.349	-26.5725		0.0375	-19.3703	-20.3172	-15.8094
0.0425	-17.8086	-6.62756	-9.83296		0.0425	-29.6851	-31.0246	-26.5761		0.0425	-20.4552	-19.0164	-16.9741
0.0475	-14.0508	-8.67335	-14.1443		0.0475	-30.5006	-30.3405	-28.2473		0.0475	-23.6042	-21.8937	-17.9212
0.0525	-18.9711	-9.04115	-11.139		0.0525	-33.3801	-32.8359	-29.0755		0.0525	-24.9488	-22.5553	-17.7379
0.0575	-17.6728	-10.0798	-13.1562		0.0575	-34.4563	-33.5695	-28.9988		0.0575	-20.7841	-21.5822	-19.554
0.0625	-20.075	-9.3375	-14.3694		0.0625	-31.1678	-32.4469	-30.317		0.0625	-23.7926	-21.4853	-19.6965
0.0675	-20.095	-9.62502	-14.1367		0.0675	-33.8126	-32.5732	-30.2304		0.0675	-24.0949	-22.2452	-20.1521
0.0725	-18.6334	-10.6478	-16.659		0.0725	-33.8094	-33.1475	-31.3124		0.0725	-24.2064	-21.9446	-21.063
0.0775	-11.6578	-9.63661	-12.8995		0.0775	-34.1697	-33.1106	-32.1604		0.0775	-23.9179	-25.3473	-21.003
0.0825	-9.07492	-8.53885	-15.7725		0.0825	-33.7627	-36.5701	-31.8367		0.0825	-26.1846	-24.4611	-20.3369
0.0875	-10.6464	-11.4072	-13.9366		0.0875	-35.5311	-35.4238	-31.2463		0.0875	-27.5316	-25.3385	-22.0604
0.0925	-13.5837	-8.58574	-15.994		0.0925	-37.2976	-35.8893	-33.211		0.0925	-25.4748	-26.761	-22.571
0.0975	-11.3228	-11.325	-16.4692		0.0975	-35.2577	-37.6925	-33.238		0.0975	-26.2707	-24.0793	-23.1148
0.1025	-14.094	-10.6795	-16.2551		0.1025	-36.1748	-35.3643	-33.8811		0.1025	-26.0886	-26.2347	-23.5009
0.1075	-10.0941	-8.3639	-18.4844		0.1075	-35.8522	-37.2141	-34.4778		0.1075	-27.7038	-27.8705	-23.6621
0.1125	-12.7302	-11.3882	-15.8121		0.1125	-37.3676	-39.0752	-34.6458		0.1125	-28.2572	-26.8691	-22.9268
0.1175	-16.1887	-10.0792	-16.4796		0.1175	-37.7842	-37.8325	-33.9977		0.1175	-27.6157	-24.2457	-24.0512
0.1225	-16.8592	-11.5751	-19.6497		0.1225	-37.6322	-35.3184	-35.0846		0.1225	-27.4914	-25.3992	-24.5766
0.1275	-19.871	-11.7612	-17.9755		0.1275	-37.489	-36.455	-35.5562		0.1275	-28.3518	-25.0246	-25.0365
0.1325	-20.0762	-11.6929	-18.5576		0.1325	-38.4572	-36.3158	-36.053		0.1325	-28.1775	-27.4892	-25.6746
0.1375	-14.3604	-12.1861	-19.01		0.1375	-38.3662	-38.4668	-36.6326		0.1375	-27.8502	-27.2714	-26.655
0.1425	-16.2681	-14.1255	-17.7641		0.1425	-37.9799	-38.5668	-37.6034		0.1425	-28.6341	-27.5395	-27.2026
0.1475	-20.8653	-12.2354	-20.3853		0.1475	-38.7159	-38.6019	-38.137		0.1475	-27.7081	-26.9235	-26.8665
0.1525	-23.2954	-12.8186	-19.1494		0.1525	-38.1458	-38.0894	-37.9331		0.1525	-28.2573	-26.7509	-26.7304
0.1575	-16.6115	-11.9794	-18.663		0.1575	-38.4175	-37.8646	-37.7491		0.1575	-29.5855	-27.2394	-27.4073
0.1625	-19.0952	-11.9742	-19.4117		0.1625	-39.7449	-38.5745	-38.5602		0.1625	-30.3968	-26.5771	-27.3088
0.1675	-31.4615	-12.5136	-19.8526		0.1675	-40.4257	-37.7154	-38.7016		0.1675	-29.7816	-28.0095	-28.8082
0.1725	-17.165	-12.6666	-22.3389		0.1725	-39.8296	-38.9683	-39.8279		0.1725	-30.5659	-27.6925	-28.5974
0.1775	-17.2526	-12.5854	-18.7784		0.1775	-40.6794	-38.8575	-39.7674		0.1775	-28.9595	-27.4925	-28.7062
0.1825	-29.0898	-15.3274	-18.9046		0.1825	-38.9801	-38.6042	-39.9219		0.1825	-30.0627	-29.3901	-29.6446
0.1875	-19.8144	-15.3594	-20.6202		0.1875	-40.029	-40.2423	-40.5559		0.1875	-30.3052	-29.3661	-29.8918
0.1925	-23.005	-16.2256	-21.7254		0.1925	-40.3916	-40.0736	-41.0163		0.1925	-29.6485	-28.8824	-30.2788
0.1975	-20.6879	-16.2783	-23.8138		0.1975	-39.6154	-39.809	-41.1232		0.1975	-32.604	-29.1155	-30.6834
0.2025	-24.8775	-13.543	-20.6793		0.2025	-42.3206	-40.2074	-41.6544		0.2025	-32.7621	-28.7	-30.8731
0.2075	-18.0234	-15.1037	-23.282		0.2075	-42.4861	-39.854	-41.8719		0.2075	-33.4915	-29.1426	-30.9884
0.2125	-17.2893	-16.7394	-22.3275		0.2125	-43.1754	-39.9084	-41.7221		0.2125	-33.1922	-28.5522	-31.8225
0.2175	-15.5059	-15.5033	-24.5172		0.2175	-43.0005	-39.5709	-42.8011		0.2175	-31.5738	-29.5725	-31.1941
0.2225	-20.4637	-14.8713	-22.5376		0.2225	-41.286	-40.9723	-41.9965		0.2225	-32.5821	-30.442	-31.9768
0.2275	-21.9719	-17.3418	-23.4232		0.2275	-42.4982	-40.872	-42.7904		0.2275	-32.4945	-30.5334	-32.5161
0.2325	-23.6484	-16.2685	-22.222		0.2325	-42.3399	-40.8952	-43.2982		0.2325	-31.9978	-32.1713	-32.4805
0.2375	-20.2792	-18.4002	-24.2916		0.2375	-42.0876	-43.2079	-43.496		0.2375	-31.1365	-31.1262	-32.9552
0.2425	-18.0204	-15.4185	-23.8173		0.2425	-41.2104	-42.2682	-44.4606		0.2425	-32.8399	-31.6641	-33.1624
0.2475	-19.4533	-17.6554	-25.7631		0.2475	-42.4112	-42.2549	-44.1932		0.2475	-33.2625	-30.0778	-30.3893
0.2525	-19.4314	-15.4244	-26.619		0.2525	-42.8441	-41.1433	-41.4446		0.2525	-34.0507	-31.6311	-32.755
0.2575	-25.0353	-16.1222	-25.2177		0.2575	-44.1114	-42.3681	-44.0335		0.2575	-31.0196	-31.2935	-33.1061
0.2625	-30.9884	-19.0528	-24.888		0.2625	-41.2002	-42.4974	-43.4995		0.2625	-34.8161	-29.965	-35.1445
0.2675	-26.2065	-18.7091	-28.077		0.2675	-44.3735	-40.7531	-46.0121		0.2675	-33.2913	-32.1767	-35.3826
0.2725	-28.0904	-19.4314	-25.758		0.2725	-43.2327	-42.9363	-46.0605		0.2725	-33.5267	-32.758	-35.7871
0.2775	-32.145	-18.9288	-25.1675		0.2775	-43.3694	-43.4156	-46.921		0.2775	-32.1001	-31.3814	-36.0463
0.2825	-25.1072	-17.3161	-26.099		0.2825	-41.8603	-43.3253	-46.8401		0.2825	-35.0296	-32.1212	-36.5675
0.2875	-30.5978	-19.8697	-28.242		0.2875	-44.7199	-43.0741	-47.5476		0.2875	-34.5415	-33.0675	-37.6821
0.2925	-31.4682	-20.6206	-27.8717		0.2925	-44.2328	-44.3703	-48.5185		0.2925	-35.1197	-32.065	-37.1967
0.2975	-32.4127	-19.7736	-26.6931		0.2975	-44.7387	-42.7382	-48.4866		0.2975	-33.9242	-31.2123	-37.0162
0.3025	-28.4182	-19.4089	-27.23		0.3025	-43.8234	-42.4094	-48.6963		0.3025	-33.8714	-32.2542	-38.1351
0.3075	-33.9222	-20.3025	-28.2202		0.3075	-43.9184	-42.779	-48.7074		0.3075	-33.9719	-32.5355	-37.4417
0.3125	-34.6048	-19.4984	-27.8033		0.3125	-43.7469	-43.2011	-48.6486		0.3125	-34.8682	-34.3623	-38.4826
0.3175	-30.6257	-22.4107	-31.4445		0.3175	-44.7375	-45.6156	-49.5245		0.3175	-35.34	-33.9387	-38.2229
0.3225	-26.0944	-18.3188	-31.3908		0.3225	-45.3655	-45.1565	-49.0462		0.3225	-35.598	-35.5487	-39.0907
0.3275	-30.7371	-19.8908	-30.4748		0.3275	-45.6651	-46.36	-49.7395		0.3275	-35.7239	-34.283	-39.6409
0.3325	-32.7274	-23.6114	-30.8406		0.3325	-45.7135	-45.1807	-50.8903		0.3325	-34.957	-33.1501	-39.6884
0.3375	-27.8909	-22.9492	-31.2921		0.3375	-45.207	-44.4484	-50.9427		0.3375	-37.0152	-33.6183	-40.0235
0.3425	-25.4108	-21.1121	-29.7695		0.3425	-47.0587	-44.5602	-51.3231		0.3425	-37.052	-35.0369	-41.259
0.3475	-27.4591	-20.1449	-31.5431		0.3475	-46.7941	-45.9349	-52.3398		0.3475	-37.6796	-35.2185	-40.038
0.3525	-34.7633	-22.4753	-30.2451		0.3525	-47.5094	-46.1682	-51.1436		0.3525	-36.2657	-31.7306	-40.0457
0.3575	-30.3566	-21.7732	-30.9049		0.3575	-46.1116	-42.7503	-51.3784		0.3575	-37.7617	-35.1673	-41.4015
0.3625	-29.7623	-21.8607	-30.3465		0.3625	-47.6018	-46.428	-52.3141		0.3625	-36.5713	-36.0625	-42.244
0.3675	-38.1596	-24.5093	-30.3051		0.3675	-46.9454	-47.3932	-53.326		0.3675	-40.319	-36.2489	-41.7743
0.3725	-27.1463	-22.5756	-31.3902		0.3725	-49.6218	-47.5366	-53		0.3725	-36.2549	-35.1058	-41.4622
0.3775	-24.6676	-23.5902	-30.7562		0.3775	-46.359	-46.3233	-52.6904		0.3775	-38.8606	-34.5512	-42.5693
0.3825	-25.3716	-23.6328	-31.715		0.3825	-48.6762	-45.6786	-53.4531		0.3825	-39.3415	-37.7648	-43.0023
0.3875	-26.4156	-23.5293	-32.95		0.3875	-49.3338	-48.6181	-54.4118		0.3875	-37.4826	-36.4535	-43.0443
0.3925	-32.0179	-24.0625	-33.6823		0.3925	-47.5751	-47.9917	-54.1366		0.3925	-38.5412	-35.5961	-43.3106
0.3975	-37.1446	-23.0932	-33.3889		0.3975	-48.5791	-47.0717	-53.9893		0.3975	-38.4241	-36.7629	-44.5822
0.4025	-35.0959	-23.5774	-32.7852		0.4025	-48.791	-47.7372	-55.2864		0.4025	-36.772	-36.7745	-42.9184
0.4075	-33.6189	-23.7008	-32.2578		0.4075	-46.8402	-47.9198	-53.9387		0.4075	-37.9545	-37.3623	-44.3964
0.4125	-34.2497	-25.8771	-35.39		0.4125	-48.1841	-48.6679	-55.4097		0.4125	-38.7182	-38.3084	-44.4807
0.4175	-36.828	-25.1699	-32.9877		0.4175	-48.7117	-49.6733	-56.0971		0.4175	-39.4738	-36.3606	-46.3323
0.4225	-31.7705	-27.0397	-35.3141		0.4225	-49.3493	-47.5379	-57.2878		0.4225	-39.8251	-37.4753	-45.4167
0.4275	-31.9763	-24.5877	-34.2779		0.4275	-49.9917	-48.3696	-56.5974		0.4275	-39.4185	-38.6447	-46.8533
0.4325	-39.7089	-26.7192	-36.1245		0.4325	-49.374	-49.4771	-57.2571		0.4325	-40.3013	-37.5894	-46.4937
0.4375	-35.0415	-24.9452	-35.1736		0.4375	-50.0755	-49.6475	-57.9876		0.4375	-39.2488	-37.0454	-46.8261
0.4425	-27.391	-24.9614	-36.5019		0.4425	-49.2715	-48.1572	-57.7758		0.4425	-39.2965	-39.4967	-46.5669
0.4475	-31.7083	-26.7535	-35.2136		0.4475	-48.9731	-50.5718	-57.4031		0.4475	-42.1122	-37.4857	-48.9137
0.4525	-42.2858	-25.8376	-34.2799		0.4525	-51.9173	-49.1913	-59.952		0.4525	-40.5184	-40.0792	-46.9278
0.4575	-36.1969	-25.6506	-35.8705		0.4575	-50.5396	-51.4982	-58.2914		0.4575	-42.1254	-38.1865	-48.2149
0.4625	-38.6362	-27.2091	-34.1973		0.4625	-51.5745	-49.0855	-58.8894		0.4625	-41.5162	-37.9274	-47.4237
0.4675	-39.0653	-27.2722	-37.3513		0.4675	-51.2652	-49.3855	-58.6688		0.4675	-41.9401	-39.8935	-49.4779
0.4725	-39.2576	-27.3578	-39.1908		0.4725	-51.7901	-50.6497	-61.3231		0.4725	-41.5184	-42.1093	-50.4568
0.4775	-38.5198	-25.3923	-36.2906		0.4775	-51.6875	-53.2385	-61.4971		0.4775	-40.8829	-38.3449	-48.8153
0.4825	-32.5887	-26.2803	-39.3883		0.4825	-51.062	-49.4774	-59.7688		0.4825	-41.3169	-38.3295	-47.934
0.4875	-31.614	-26.4781	-39.0769		0.4875	-51.3248	-50.0842	-59.3916		0.4875	-41.4578	-40.9393	-47.9698
0.4925	-32.1353	-27.13	-38.3603		0.4925	-51.2852	-51.7702	-58.6139		0.4925	-43.0804	-41.115	-48.0494
0.4975	-34.9781	-25.6387	-36.1635		0.4975	-52.5432	-52.698	-58.9862		0.4975	-43.0181	-40.7295	-49.5368
0.5025	-35.4785	-28.3842	-37.5165		0.5025	-52.2923	-52.7839	-60.4791		0.5025	-42.4121	-39.1024	-51.6204
0.5075	-35.3625	-31.8583	-37.8944		0.5075	-52.3199	-50.97	-62.5532		0.5075	-41.2914	-40.8525	-51.2029
0.5125	-35.3818	-26.9655	-39.3175		0.5125	-51.9521	-52.1435	-62.0556		0.5125	-44.3247	-41.3965	-49.5314
0.5175	-40.8347	-28.4032	-40.7516		0.5175	-54.3496	-52.2442	-61.158		0.5175	-45.3814	-41.3531	-51.9808
0.5225	-46.2159	-27.2928	-39.9981		0.5225	-55.0477	-52.2911	-62.7701		0.5225	-43.9296	-41.4758	-52.8441
0.5275	-48.5046	-28.6956	-39.9577		0.5275	-54.1629	-52.1998	-63.7039		0.5275	-44.7791	-42.5918	-50.9959
0.5325	-41.403	-28.3784	-40.5095		0.5325	-54.4977	-53.4973	-62.4316		0.5325	-45.7782	-41.9326	-50.0338
0.5375	-35.031	-27.3285	-40.1486		0.5375	-55.1098	-52.4331	-60.898		0.5375	-45.4429	-40.6268	-52.1706
0.5425	-36.0746	-29.6399	-41.3777		0.5425	-55.1305	-52.2158	-63.2878		0.5425	-44.3379	-39.4905	-52.9681
0.5475	-39.1101	-29.5431	-41.9641		0.5475	-54.4966	-50.3968	-63.801		0.5475	-44.8823	-42.4146	-53.3306
0.5525	-45.9746	-29.3574	-44.1179		0.5525	-54.9661	-53.804	-64.5284		0.5525	-44.7488	-42.5627	-52.7268
0.5575	-40.8165	-32.4167	-40.94		0.5575	-54.532	-53.2638	-63.544		0.5575	-45.3414	-41.1072	-51.4455
0.5625	-39.2084	-29.9627	-41.2126		0.5625	-55.2383	-52.383	-62.6888		0.5625	-46.4442	-44.1801	-52.6741
0.5675	-37.8948	-30.01	-42.6229		0.5675	-56.6745	-54.6733	-64.4227		0.5675	-46.3838	-41.1641	-52.7014
0.5725	-36.8966	-29.7674	-41.3875		0.5725	-55.9314	-53.7328	-63.8761		0.5725	-46.6306	-41.9933	-52.4524
0.5775	-38.3433	-29.4031	-42.7468		0.5775	-56.8807	-52.7386	-63.7314		0.5775	-46.1436	-44.3781	-56.0441
0.5825	-36.296	-29.3779	-41.7976		0.5825	-56.1835	-55.4009	-67.1997		0.5825	-47.6019	-43.9294	-55.9235
0.5875	-37.1985	-28.8549	-42.3224		0.5875	-57.8033	-55.3723	-66.7224		0.5875	-46.2437	-45.349	-56.3306
0.5925	-46.6026	-30.6276	-42.9279		0.5925	-56.4895	-55.9999	-67.4185		0.5925	-47.2531	-45.7204	-54.3491
0.5975	-37.229	-30.5221	-42.1251		0.5975	-57.0296	-56.5239	-65.3138		0.5975	-46.0263	-43.2642	-56.2188
0.6025	-40.4538	-32.4133	-42.6089		0.6025	-56.5196	-53.5575	-66.6445		0.6025	-46.6915	-47.0266	-55.0952
0.6075	-40.0099	-34.2349	-43.1963		0.6075	-56.8349	-57.7947	-66.4434		0.6075	-48.9061	-43.1451	-54.2859
0.6125	-43.6134	-31.595	-43.0962		0.6125	-58.1662	-54.0745	-65.8416		0.6125	-49.0191	-45.4229	-55.9023
0.6175	-36.9777	-31.7265	-43.3069		0.6175	-58.7276	-56.1009	-67.3494		0.6175	-47.5962	-46.0394	-56.4505
0.6225	-39.4239	-32.8589	-44.066		0.6225	-57.7074	-56.7538	-67.4623		0.6225	-49.67	-44.1681	-56.6681
0.6275	-38.0775	-34.3945	-45.3513		0.6275	-59.7756	-55.1881	-67.7981		0.6275	-47.9053	-44.8124	-56.4699
0.6325	-39.1404	-33.0727	-44.3618		0.6325	-58.3643	-55.5172	-67.2113		0.6325	-48.1421	-43.9423	-57.4593
0.6375	-37.6235	-33.9854	-43.9163		0.6375	-58.4678	-54.3522	-68.4052		0.6375	-49.4852	-44.5845	-55.6264
0.6425	-39.1628	-33.2174	-44.8959		0.6425	-59.2043	-55.0882	-65.4308		0.6425	-49.8624	-46.0001	-57.5568
0.6475	-40.5829	-34.4669	-46.6732		0.6475	-59.4909	-57.1101	-67.0951		0.6475	-49.4448	-45.0367	-59.571
0.6525	-41.7627	-33.4012	-45.5192		0.6525	-59.0685	-56.4405	-70.6583		0.6525	-52.5921	-47.8869	-58.295
0.6575	-46.1381	-32.1205	-46.441		0.6575	-62.3658	-58.1546	-68.1497		0.6575	-49.2646	-44.5335	-55.2595
0.6625	-39.9437	-35.3171	-46.2575		0.6625	-59.905	-55.4409	-66.2199		0.6625	-48.9147	-44.0802	-57.08
0.6675	-37.9303	-35.1767	-45.0974		0.6675	-59.2003	-55.3824	-67.8761		0.6675	-51.4742	-45.3013	-59.8855
0.6725	-39.4942	-33.6632	-47.0429		0.6725	-61.1147	-56.2563	-70.67		0.6725	-51.1217	-46.5965	-58.435
0.6775	-43.7194	-34.0623	-46.547		0.6775	-60.4239	-57.4393	-69.6321		0.6775	-49.4227	-46.114	-58.0056
0.6825	-45.3906	-33.5037	-46.3528		0.6825	-59.641	-57.2318	-68.8028		0.6825	-53.5144	-46.4236	-60.1415
0.6875	-43.983	-33.938	-48.3754		0.6875	-63.2186	-57.9769	-71.6986		0.6875	-50.8482	-48.9205	-59.0752
0.6925	-46.3407	-34.8286	-48.7409		0.6925	-61.2396	-59.7655	-69.8439		0.6925	-52.6374	-44.98	-57.5124
0.6975	-49.8877	-35.4989	-47.0602		0.6975	-61.2247	-56.1857	-68.3112		0.6975	-51.1525	-49.082	-62.0076
0.7025	-45.4314	-35.2743	-47.6121		0.7025	-61.1841	-59.9353	-72.1736		0.7025	-51.8605	-45.5479	-58.5065
0.7075	-41.0352	-35.9408	-47.4363		0.7075	-61.7674	-56.1578	-69.3895		0.7075	-52.068	-47.3498	-61.0031
0.7125	-43.472	-34.928	-47.7389		0.7125	-61.8474	-58.9901	-73.528		0.7125	-52.7769	-47.95	-60.263
0.7175	-40.3069	-37.1784	-49.4566		0.7175	-62.6756	-58.725	-71.8078		0.7175	-52.7794	-44.7745	-57.6539
0.7225	-44.211	-36.9106	-48.9634		0.7225	-62.5299	-56.7274	-69.6344		0.7225	-53.1862	-46.7814	-60.8508
0.7275	-45.4336	-36.5367	-49.1027		0.7275	-63.0128	-57.1093	-72.6032		0.7275	-53.4737	-47.7543	-61.9344
0.7325	-46.7337	-36.092	-49.1235		0.7325	-63.6963	-59.0501	-73.3132		0.7325	-52.6004	-50.9505	-60.7368
0.7375	-47.0293	-37.9769	-48.066		0.7375	-62.626	-60.8075	-71.7283		0.7375	-54.8312	-48.3614	-59.9547
0.7425	-50.2147	-38.0885	-48.1485		0.7425	-64.6486	-59.8593	-71.1477		0.7425	-52.8075	-49.8169	-65.3487
0.7475	-46.1286	-38.6255	-49.8604		0.7475	-62.7673	-62.0987	-76.8182		0.7475	-53.5701	-48.9174	-62.9323
0.7525	-44.2187	-37.4931	-48.3148		0.7525	-63.6477	-60.8558	-73.9327		0.7525	-53.6471	-47.8104	-63.6146
0.7575	-48.5883	-39.5552	-48.3669		0.7575	-63.28	-58.9259	-74.5565		0.7575	-54.5278	-50.2386	-63.887
0.7625	-44.8637	-39.3563	-48.6718		0.7625	-64.9378	-61.4177	-74.5601		0.7625	-54.2682	-51.2222	-61.7104
0.7675	-47.9213	-39.1343	-48.0843		0.7675	-64.0366	-61.439	-72.5672		0.7675	-55.0015	-48.8635	-63.6596
0.7725	-44.5489	-38.3041	-48.5556		0.7725	-64.8731	-59.7562	-74.4798		0.7725	-53.6237	-50.035	-62.0174
0.7775	-43.9338	-37.5058	-49.8205		0.7775	-63.6148	-61.7649	-73.1345		0.7775	-53.2206	-50.014	-63.556
0.7825	-42.8054	-36.2092	-49.9503		0.7825	-63.7938	-62.2482	-74.8316		0.7825	-56.2447	-48.9115	-63.0014
0.7875	-41.5743	-36.5503	-50.0472		0.7875	-65.9794	-60.7063	-74.6703		0.7875	-56.2963	-48.1283	-61.1241
0.7925	-41.9062	-36.8254	-49.2411		0.7925	-66.6585	-61.4743	-73.8829		0.7925	-54.3474	-51.7739	-65.3606
0.7975	-41.3248	-39.0382	-49.9269		0.7975	-65.3079	-62.5913	-75.8571		0.7975	-56.0511	-49.4935	-64.2953
0.8025	-45.9431	-39.7465	-49.3952		0.8025	-65.9558	-61.0423	-75.012		0.8025	-54.8545	-50.3132	-63.3726
0.8075	-43.4843	-39.113	-49.5606		0.8075	-65.4032	-61.0394	-74.3269		0.8075	-55.8398	-53.8651	-64.6123
0.8125	-43.7967	-39.2477	-51.0425		0.8125	-66.4783	-64.593	-75.9816		0.8125	-57.423	-51.3731	-64.2281
0.8175	-44.9587	-38.6322	-49.3301		0.8175	-67.4004	-62.5391	-74.7957		0.8175	-55.6603	-50.4385	-64.1085
0.8225	-46.1627	-38.1728	-49.7193		0.8225	-65.8297	-61.8035	-76.3588		0.8225	-56.8224	-54.1871	-65.4239
0.8275	-43.1602	-39.0372	-49.8581		0.8275	-67.075	-65.4744	-75.924		0.8275	-59.3768	-53.3684	-67.4887
0.8325	-43.9229	-38.7306	-49.8713		0.8325	-69.2633	-64.7637	-77.9014		0.8325	-56.7448	-51.3244	-66.2419
0.8375	-43.3334	-40.9808	-50.5095		0.8375	-66.9487	-62.2505	-76.5906		0.8375	-57.3364	-53.0673	-67.2018
0.8425	-46.1385	-40.7985	-50.0858		0.8425	-68.0757	-64.2708	-77.4201		0.8425	-58.6459	-51.9353	-66.4584
0.8475	-47.9568	-39.171	-50.2311		0.8475	-69.0117	-62.9872	-76.8958		0.8475	-58.3668	-52.5217	-66.2093
0.8525	-46.9246	-40.7094	-49.5263		0.8525	-68.3795	-63.192	-76.4761		0.8525	-59.139	-56.4204	-67.9085
0.8575	-52.0475	-40.4369	-50.6569		0.8575	-69.3328	-67.059	-79.1938		0.8575	-61.0502	-52.7128	-65.1448
0.8625	-52.7997	-40.5402	-50.8489		0.8625	-71.5877	-64.0559	-76.5558		0.8625	-61.6436	-54.269	-69.0242
0.8675	-49.9346	-42.3126	-50.1594		0.8675	-71.9152	-64.9289	-79.1425		0.8675	-55.789	-56.5259	-68.0764
0.8725	-44.9365	-40.3231	-50.6343		0.8725	-67.6946	-66.9275	-80.5019		0.8725	-60.994	-54.1805	-66.5548
0.8775	-47.2287	-41.4644	-49.7524		0.8775	-72.3732	-65.8606	-77.8967		0.8775	-61.648	-53.2248	-67.5165
0.8825	-46.8108	-39.8457	-50.9415		0.8825	-69.2597	-64.7775	-77.9595		0.8825	-61.5833	-52.1076	-66.6671
0.8875	-42.9419	-40.2489	-50.9639		0.8875	-69.4825	-63.0181	-77.2679		0.8875	-62.4157	-51.8786	-68.0187
0.8925	-45.0491	-39.2171	-50.1487		0.8925	-70.8368	-62.7117	-79.1967		0.8925	-60.2588	-55.2094	-70.9106
0.8975	-46.0979	-43.7689	-50.258		0.8975	-70.2914	-64.7432	-80.8251		0.8975	-61.0173	-54.9158	-67.2046
0.9025	-46.5414	-41.4443	-51.5947		0.9025	-70.3251	-66.365	-77.6148		0.9025	-59.1738	-55.0228	-70.0839
0.9075	-47.1121	-42.0677	-50.9328		0.9075	-68.8475	-64.138	-79.3146		0.9075	-59.9558	-56.9309	-68.5484
0.9125	-49.6765	-41.55	-51.2508		0.9125	-70.0581	-67.3698	-79.9513		0.9125	-59.7882	-56.1345	-69.8222
0.9175	-45.5911	-42.1698	-50.577		0.9175	-69.9491	-67.3298	-80.4954		0.9175	-62.1723	-54.1261	-66.7094
0.9225	-44.6407	-41.4804	-51.1923		0.9225	-72.0822	-65.1263	-77.7146		0.9225	-59.7952	-55.3979	-70.6313
0.9275	-43.5626	-44.8275	-51.1547		0.9275	-69.7164	-66.8008	-82.2784		0.9275	-63.6133	-55.9501	-70.9698
0.9325	-43.3427	-41.7178	-50.6162		0.9325	-72.954	-66.2894	-82.157		0.9325	-63.1286	-56.3006	-69.2495
0.9375	-50.3495	-41.419	-51.7042		0.9375	-74.2861	-67.9031	-79.0255		0.9375	-65.2196	-56.1642	-71.2726
0.9425	-46.9969	-41.2765	-50.4851		0.9425	-72.9012	-65.0984	-82.0316		0.9425	-64.5197	-54.8214	-68.9178
0.9475	-47.6834	-42.6085	-51.3545		0.9475	-74.9909	-67.5319	-81.1164		0.9475	-65.9517	-56.2543	-72.1843
0.9525	-49.3285	-40.4902	-51.5261		0.9525	-75.8878	-66.9521	-82.1414		0.9525	-63.1621	-56.0088	-70.5407
0.9575	-47.5529	-43.4933	-50.475		0.9575	-73.4147	-66.403	-82.146		0.9575	-60.743	-57.4664	-71.2697
0.9625	-45.2997	-43.1209	-50.881		0.9625	-71.106	-67.9777	-80.398		0.9625	-62.158	-57.9046	-69.0297
0.9675	-45.3523	-44.8061	-50.949		0.9675	-72.857	-68.615	-78.673		0.9675	-63.8232	-59.2156	-72.417
0.9725	-50.918	-43.5172	-50.4852		0.9725	-74.6847	-70.0475	-82.6332		0.9725	-65.9383	-55.3895	-69.9462
0.9775	-48.4408	-41.6687	-50.4042		0.9775	-76.6015	-66.112	-80.063		0.9775	-67.8117	-57.1101	-69.9925
0.9825	-53.8311	-44.9646	-51.4945		0.9825	-78.5356	-67.4327	-80.9819		0.9825	-64.3135	-57.5883	-72.1076
0.9875	-48.2693	-42.5178	-51.8719		0.9875	-75.8921	-68.7874	-83.1392		0.9875	-67.2402	-59.1457	-72.3579
0.9925	-41.9653	-45.992	-50.2881		0.9925	-78.7642	-69.4465	-83.3409		0.9925	-66.9893	-58.4862	-71.9133
0.9975	-45.6389	-42.198	-51.2293		0.9975	-77.4594	-69.2069	-82.3907		0.9975	-73.4028	-57.5392	-72.1571
1.0025	-45.1717	-42.4715	-51.1653		1.0025	-81.8525	-68.8201	-83.2551		1.0025	-61.831	-57.6119	-71.6211
1.0075	-49.0242	-41.0519	-51.1933		1.0075	-72.7341	-69.2515	-83.2802		1.0075	-62.9533	-57.8653	-72.1597
1.0125	-48.4167	-42.0376	-51.5589		1.0125	-74.0229	-69.4125	-83.6235		1.0125	-66.6063	-57.248	-74.1099
1.0175	-48.5006	-43.7351	-50.9653		1.0175	-77.9932	-68.4695	-85.7812		1.0175	-64.338	-60.4265	-73.9119
1.0225	-46.075	-40.045	-50.5457		1.0225	-76.0607	-71.2096	-84.0968		1.0225	-66.331	-61.3688	-75.943
1.0275	-46.012	-45.6008	-50.707		1.0275	-77.4475	-71.2798	-86.1547		1.0275	-68.4504	-61.118	-72.7305
1.0325	-48.6419	-45.1587	-50.3544		1.0325	-77.9595	-72.3729	-84.123		1.0325	-70.1578	-58.7398	-75.0429
1.0375	-44.7381	-43.4229	-52.4805		1.0375	-80.6751	-71.6012	-86.461		1.0375	-69.7206	-58.5684	-73.1638
1.0425	-379.298	-379.298	-379.298		1.0425	-81.0862	-69.5607	-83.5247		1.0425	-68.2869	-59.4362	-76.0708
1.0475	-379.298	-379.298	-379.298		1.0475	-79.0068	-70.6046	-86.4844		1.0475	-68.3761	-60.3396	-72.8595
1.0525	-379.298	-379.298	-379.298		1.0525	-80.1555	-70.751	-82.0976		1.0525	-67.6426	-58.3969	-71.4261
1.0575	-379.298	-379.298	-379.298		1.0575	-78.7017	-69.9493	-82.48		1.0575	-68.5969	-63.6609	-76.5866
1.0625	-379.298	-379.298	-379.298		1.0625	-79.5667	-74.2117	-87.1557		1.0625	-68.7677	-60.2195	-73.0077
1.0675	-379.298	-379.298	-379.298		1.0675	-79.3577	-71.5619	-83.6527		1.0675	-67.8229	-61.9639	-74.8629
1.0725	-379.298	-379.298	-379.298		1.0725	-79.55	-71.4576	-85.2894		1.0725	-68.0746	-59.138	-73.215
1.0775	-379.298	-379.298	-379.298		1.0775	-79.8399	-70.5194	-86.6549		1.0775	-67.6831	-59.8971	-72.9183
1.0825	-379.298	-379.298	-379.298		1.0825	-80	-70.9489	-84.5665		1.0825	-69.1183	-61.9402	-76.864
1.0875	-379.298	-379.298	-379.298		1.0875	-80.5538	-73.8611	-88.9842		1.0875	-69.5335	-63.1169	-73.6617
1.0925	-379.298	-379.298	-379.298		1.0925	-81.5408	-73.9781	-84.5897		1.0925	-70.125	-62.1698	-74.4774
1.0975	-379.298	-379.298	-379.298		1.0975	-81.0338	-73.0129	-85.7791		1.0975	-72.0382	-60.2543	-74.2141
1.1025	-379.298	-379.298	-379.298		1.1025	-82.349	-71.2668	-85.3015		1.1025	-73.0388	-59.5458	-71.928
1.1075	-379.298	-379.298	-379.298		1.1075	-83.4749	-70.592	-83.0762		1.1075	-70.1638	-60.911	-74.4431
1.1125	-379.298	-379.298	-379.298		1.1125	-80.4722	-71.5836	-84.4806		1.1125	-69.5235	-63.6802	-79.4301
1.1175	-379.298	-379.298	-379.298		1.1175	-80.0056	-75.0341	-89.6822		1.1175	-73.8931	-64.9384	-74.9163
1.1225	-379.298	-379.298	-379.298		1.1225	-83.4781	-75.6581	-85.9566		1.1225	-68.573	-62.75	-75.9314
1.1275	-379.298	-379.298	-379.298		1.1275	-78.0021	-74.2697	-88.7022		1.1275	-69.9281	-63.2313	-78.0759
1.1325	-379.298	-379.298	-379.298		1.1325	-80.1112	-74.6612	-89.4019		1.1325	-72.3981	-65.7648	-79.0512
1.1375	-379.298	-379.298	-379.298		1.1375	-82.0766	-78.8651	-90.5621		1.1375	-73.0815	-61.9875	-76.8125
1.1425	-379.298	-379.298	-379.298		1.1425	-82.6794	-76.013	-89.2517		1.1425	-74.4976	-64.7834	-78.3654
1.1475	-379.298	-379.298	-379.298		1.1475	-83.4454	-76.2524	-89.021		1.1475	-73.6299	-66.6797	-78.702
1.1525	-379.298	-379.298	-379.298		1.1525	-82.9703	-77.4761	-88.0684		1.1525	-75.1053	-64.2228	-79.3586
1.1575	-379.298	-379.298	-379.298		1.1575	-84.8663	-75.9769	-88.3425		1.1575	-75.1845	-67.8307	-80.6135
1.1625	-379.298	-379.298	-379.298		1.1625	-82.6672	-79.775	-92.4634		1.1625	-73.9596	-62.9473	-77.0396
1.1675	-379.298	-379.298	-379.298		1.1675	-83.3408	-73.8344	-87.5218		1.1675	-74.5178	-68.9264	-79.2328
1.1725	-379.298	-379.298	-379.298		1.1725	-83.1655	-78.179	-90.3587		1.1725	-71.2892	-66.0091	-80.1492
1.1775	-379.298	-379.298	-379.298		1.1775	-81.0439	-77.1215	-90.397		1.1775	-71.3427	-66.8116	-81.138
1.1825	-379.298	-379.298	-379.298		1.1825	-81.3247	-77.7669	-92.1947		1.1825	-70.8958	-65.9117	-82.697
1.1875	-379.298	-379.298	-379.298		1.1875	-82.1603	-76.6561	-93.6875		1.1875	-81.7914	-62.0848	-74.7974
1.1925	-379.298	-379.298	-379.298		1.1925	-87.9785	-73.1838	-86.3806		1.1925	-67.9089	-67.1461	-82.4752
1.1975	-379.298	-379.298	-379.298		1.1975	-78.2065	-79.0815	-93.7602		1.1975	-70.6835	-65.884	-79.1575
1.2025	-379.298	-379.298	-379.298		1.2025	-82.939	-77.6422	-90.2494		1.2025	-84.178	-68.4521	-83.2901
1.2075	-379.298	-379.298	-379.298		1.2075	-88.8601	-79.7889	-94.1528		1.2075	-79.3922	-67.7556	-80.3167
1.2125	-379.298	-379.298	-379.298		1.2125	-86.6006	-78.2495	-90.9863		1.2125	-79.8556	-69.3922	-79.8459
1.2175	-379.298	-379.298	-379.298		1.2175	-88.0393	-79.8172	-91.344		1.2175	-73.9606	-69.6476	-85.2883
1.2225	-379.298	-379.298	-379.298		1.2225	-83.0851	-81.6921	-97.4677		1.2225	-73.1692	-66.819	-80.2857
1.2275	-379.298	-379.298	-379.298		1.2275	-82.5367	-81.7564	-92.4764		1.2275	-73.9771	-68.4784	-81.8519
1.2325	-379.298	-379.298	-379.298		1.2325	-83.1899	-80.1384	-93.6521		1.2325	-74.7362	-65.9708	-81.3516
1.2375	-379.298	-379.298	-379.298		1.2375	-85.1418	-76.8983	-91.9045		1.2375	-75.2984	-70.2861	-82.2501
1.2425	-379.298	-379.298	-379.298		1.2425	-85.0958	-80.3081	-93.2467		1.2425	-75.9145	-65.7496	-79.1841
1.2475	-379.298	-379.298	-379.298		1.2475	-86.9693	-76.6823	-90.2222		1.2475	-76.5525	-70.1449	-82.1108
					1.2525	-86.6725	-80.928	-92.9957		1.2525	-75.6617	-67.5007	-83.9462
					1.2575	-86.2807	-81.3414	-96.6721		1.2575	-76.0985	-64.4253	-75.752
					1.2625	-86.3021	-75.827	-89.0996		1.2625	-75.6715	-71.6198	-82.5449
					1.2675	-87.5515	-81.827	-94.0438		1.2675	-75.4558	-68.3169	-83.2876
					1.2725	-87.2608	-80.6317	-95.1442		1.2725	-76.4531	-69.2389	-82.583
					1.2775	-87.9367	-81.0135	-96.4431		1.2775	-77.3296	-66.3798	-81.5509
					1.2825	-90.1772	-77.8666	-92.0542		1.2825	-78.242	-72.7302	-87.1338
					1.2875	-89.335	-84.3098	-97.621		1.2875	-79.5577	-71.7334	-85.2524
					1.2925	-90.843	-82.8766	-95.8091		1.2925	-76.9931	-73.9969	-88.3147
					1.2975	-87.8186	-83.8367	-98.8443		1.2975	-78.2342	-68.5304	-80.0932
					1.3025	-88.9781	-79.7425	-91.513		1.3025	-79.5291	-68.5905	-83.8758
					1.3075	-88.513	-79.4569	-94.6293		1.3075	-79.0764	-70.0935	-84.9912
					1.3125	-88.8406	-81.2122	-96.3226		1.3125	-82.0597	-68.1511	-81.8688
					1.3175	-91.0882	-80.8035	-94.4955		1.3175	-80.3605	-72.3048	-84.3787
					1.3225	-89.9316	-83.4231	-95.1135		1.3225	-81.5861	-73.0058	-84.6335
					1.3275	-90.8911	-84.5463	-95.9949		1.3275	-81.7593	-73.9547	-85.9671
					1.3325	-90.7915	-84.916	-97.5081		1.3325	-82.5471	-74.2764	-89.0671
					1.3375	-91.0107	-85.0625	-99.5461		1.3375	-85.6717	-74.7148	-88.6333
					1.3425	-92.6335	-86.4642	-100.991		1.3425	-80.4719	-76.4755	-86.6265
					1.3475	-90.8049	-87.3515	-97.355		1.3475	-83.033	-69.6684	-83.2521
					1.3525	-91.6217	-80.6944	-93.9574		1.3525	-83.645	-76.1102	-88.211
					1.3575	-92.0094	-87.4142	-99.4909		1.3575	-82.117	-72.9603	-87.9988
					1.3625	-90.8199	-84.6405	-98.4653		1.3625	-85.4656	-73.4556	-87.1794
					1.3675	-93.6351	-84.2133	-97.3714		1.3675	-87.5767	-73.8812	-87.8239
					1.3725	-93.6911	-85.09	-98.874		1.3725	-83.3719	-68.9179	-82.8312
					1.3775	-91.3017	-79.7667	-93.6106		1.3775	-84.7471	-75.904	-90.9133
					1.3825	-91.8205	-86.0273	-101.666		1.3825	-87.0282	-71.4471	-84.765
					1.3875	-94.2232	-85.4174	-100.306		1.3875	-84.4821	-73.3836	-86.9219
					1.3925	-92.1518	-84.1276	-97.6852		1.3925	-84.2863	-74.0629	-89.2498
					1.3975	-91.7038	-85.6293	-102.335		1.3975	-85.7078	-75.6759	-90.1302
					1.4025	-93.5079	-87.3284	-100.58		1.4025	-83.1688	-74.926	-85.6396
					1.4075	-91.8718	-88.1486	-98.5542		1.4075	-83.7485	-73.4079	-91.6471
					1.4125	-93.016	-88.9835	-104.067		1.4125	-83.8982	-78.1357	-90.0408
					1.4175	-93.096	-89.6037	-101.791		1.4175	-86.0064	-79.5551	-85.8637
					1.4225	-94.8081	-90.3101	-96.8448		1.4225	-86.1495	-73.1491	-84.8914
					1.4275	-94.5348	-84.0498	-95.995		1.4275	-86.2764	-70.0093	-87.5346
					1.4325	-94.8502	-80.9098	-98.8424		1.4325	-80.5827	-75.6479	-91.8414
					1.4375	-91.8436	-87.7772	-103.359		1.4375	-86.2609	-74.4023	-86.766
					1.4425	-96.1246	-85.7314	-98.3295		1.4425	-85.8828	-75.69	-88.848
					1.4475	-95.6299	-86.5646	-99.8915		1.4475	-85.1214	-73.0972	-85.9129
					1.4525	-95.9275	-89.2648	-103.604		1.4525	-89.9841	-78.4314	-90.3931
					1.4575	-100.835	-90.0276	-101.065		1.4575	-87.8704	-77.3447	-88.7456
					1.4625	-96.7899	-88.208	-99.5345		1.4625	-90.0758	-75.8217	-91.2564
					1.4675	-98.6927	-88.7051	-104.282		1.4675	-87.0521	-76.8326	-93.6391
					1.4725	-96.7955	-88.4396	-103.553		1.4725	-87.3348	-72.9316	-89.6286
					1.4775	-98.1526	-84.2609	-100.666		1.4775	-87.8154	-79.0285	-90.4288
					1.4825	-99.3145	-89.3292	-100.907		1.4825	-87.9122	-76.1069	-88.502
					1.4875	-98.0215	-87.066	-100.018		1.4875	-87.2741	-78.6987	-91.7418
					1.4925	-98.5444	-89.8519	-103.084		1.4925	-87.1148	-84.5997	-95.4417
					1.4975	-97.7784	-96.0033	-108.185		1.4975	-89.9587	-82.1276	-98.3731
					1.5025	-99.9644	-93.2343	-110.179		1.5025	-89.5288	-80.6739	-92.2641
					1.5075	-99.8992	-91.1039	-102.829		1.5075	-91.0158	-77.6976	-90.531
					1.5125	-101.616	-88.629	-100.502		1.5125	-91.9323	-79.2043	-93.1189
					1.5175	-102.114	-90.5683	-104.367		1.5175	-93.0226	-74.9129	-88.4649
					1.5225	-102.255	-85.551	-98.3848		1.5225	-88.8983	-82.4011	-95.5864
					1.5275	-98.3053	-92.2295	-105.657		1.5275	-90.5185	-81.7824	-93.1313
					1.5325	-99.9029	-93.4933	-104.589		1.5325	-91.6651	-80.1065	-93.1529
					1.5375	-100.914	-90.8635	-104.125		1.5375	-91.3308	-75.9429	-92.0801
					1.5425	-100.745	-87.0539	-102.367		1.5425	-87.289	-79.0916	-93.4217
					1.5475	-97.9781	-90.6095	-104.488		1.5475	-92.5127	-78.9609	-91.2495
					1.5525	-100.04	-88.987	-101.38		1.5525	-92.627	-81.3363	-91.8545
					1.5575	-102.436	-90.2322	-102.333		1.5575	-97.0421	-73.3555	-85.9852
					1.5625	-104.714	-84.2903	-96.9774		1.5625	-94.1085	-79.0511	-92.6591
					1.5675	-103.573	-90.0572	-103.619		1.5675	-93.6645	-80.724	-97.2587
					1.5725	-102.902	-95.8919	-109.613		1.5725	-93.7574	-83.5514	-99.7316
					1.5775	-102.751	-92.6556	-108.472		1.5775	-97.297	-80.9067	-93.0254
					1.5825	-104.301	-93.3627	-104.305		1.5825	-94.1582	-85.2772	-104.484
					1.5875	-102.936	-95.3242	-111.951		1.5875	-93.499	-82.4139	-97.4564
					1.5925	-103.049	-91.3113	-106.733		1.5925	-90.6187	-84.0698	-99.0517
					1.5975	-100.692	-93.9823	-108.756		1.5975	-94.9662	-85.7003	-98.9018
					1.6025	-106.254	-96.2021	-109.82		1.6025	-97.7126	-83.3172	-98.4076
					1.6075	-108.093	-94.3762	-109.706		1.6075	-97.0195	-85.7478	-100.717
					1.6125	-107.18	-95.9723	-106.042		1.6125	-95.8511	-84.2141	-100.325
					1.6175	-106.366	-95.3365	-111.334		1.6175	-95.96	-80.1307	-92.8215
					1.6225	-105.93	-90.6967	-103.674		1.6225	-95.6812	-84.3456	-95.9358
					1.6275	-106.601	-96.1461	-108.056		1.6275	-97.1453	-84.2406	-100.457
					1.6325	-107.289	-95.0871	-110.496		1.6325	-98.4133	-78.6896	-91.1945
					1.6375	-108.254	-89.7188	-102.111		1.6375	-100.45	-82.9183	-99.9002
					1.6425	-110.629	-94.4981	-112.476		1.6425	-95.5113	-87.7785	-101.43
					1.6475	-105.634	-99.3873	-113.011		1.6475	-97.2496	-89.3676	-100.837
					1.6525	-106.547	-100.254	-111.809		1.6525	-98.727	-81.5982	-94.8522
					1.6575	-106.9	-93.0784	-105.675		1.6575	-95.1809	-81.6638	-97.8833
					1.6625	-104.982	-92.303	-103.945		1.6625	-93.8242	-82.6839	-97.0177
					1.6675	-104.642	-87.8513	-103.137		1.6675	-96.4336	-93.4931	-108.277
					1.6725	-103.926	-102.215	-118.509		1.6725	-97.6625	-84.8139	-98.4855
					1.6775	-104.885	-95.967	-109.561		1.6775	-98.2082	-95.1619	-110.108
					1.6825	-105.068	-106.253	-121.315		1.6825	-98.5904	-86.7318	-100.308
					1.6875	-104.794	-98.2243	-110.895		1.6875	-98.6391	-94.933	-108.207
					1.6925	-104.087	-104.341	-119.299		1.6925	-101.185	-91.0487	-104.885
					1.6975	-105.658	-102.38	-117.363		1.6975	-98.5305	-87.1811	-98.0103
					1.7025	-104.141	-90.0965	-101.869		1.7025	-101.379	-92.3895	-107.192
					1.7075	-105.518	-99.7442	-118.277		1.7075	-98.5137	-77.3677	-92.5151
					1.7125	-102.306	-88.3432	-103.502		1.7125	-101.107	-84.2156	-98.2622
					1.7175	-103.736	-95.1046	-109.234		1.7175	-102.216	-92.5325	-107.553
					1.7225	-104.301	-103.709	-121.257		1.7225	-101.302	-91.0788	-103.408
					1.7275	-104.389	-102.894	-116.387		1.7275	-104.934	-81.0374	-94.6341
					1.7325	-105.421	-92.0165	-105.624		1.7325	-101.24	-91.7613	-105.451
					1.7375	-105.171	-103.109	-118.24		1.7375	-104.207	-92.7995	-105.989
					1.7425	-104.771	-103.145	-116.575		1.7425	-105.049	-86.2625	-100.093
					1.7475	-105.211	-97.2205	-111.085		1.7475	-102.87	-79.8647	-93.9925
					1.7525	-105.242	-100.654	-116.151		1.7525	-102.303	-92.6265	-109.414
					1.7575	-106.003	-107.315	-120.576		1.7575	-102.859	-91.9287	-102.944
					1.7625	-107.246	-102.769	-113.938		1.7625	-107.36	-87.4044	-100.858
					1.7675	-107.072	-98.3393	-111.816		1.7675	-109.347	-94.3716	-107.946
					1.7725	-106.106	-106.808	-120.008		1.7725	-107.673	-91.8088	-104.72
					1.7775	-106.08	-102.121	-115.205		1.7775	-104.82	-99.9436	-113.886
					1.7825	-106.69	-104.777	-118.258		1.7825	-105.288	-95.847	-110.654
					1.7875	-107.852	-106.788	-121.544		1.7875	-104.955	-99.9057	-115.202
					1.7925	-107.161	-110.738	-126.27		1.7925	-103.571	-97.1518	-109.497
					1.7975	-108.675	-108.147	-120.488		1.7975	-104.946	-87.9468	-99.8761
					1.8025	-108.43	-98.9471	-110.863		1.8025	-104.791	-74.5561	-87.7907
					1.8075	-107.237	-85.5557	-98.7708		1.8075	-97.7594	-92.0597	-113.242
					1.8125	-105.72	-103.134	-123.813		1.8125	-99.2607	-94.5455	-107.886
					1.8175	-109.318	-105.566	-118.655		1.8175	-103.157	-85.4588	-101.304
					1.8225	-109.037	-96.4841	-112.106		1.8225	-101.932	-96.2976	-110.828
					1.8275	-108.868	-107.209	-121.822		1.8275	-102.824	-99.3956	-113.055
					1.8325	-108.6	-109.656	-122.969		1.8325	-103.846	-92.5487	-107.417
					1.8375	-108.198	-103.539	-118.408		1.8375	-103.092	-100.066	-113.654
					1.8425	-108.253	-111.057	-124.629		1.8425	-104.726	-95.7313	-108.091
					1.8475	-107.197	-108.087	-122.265		1.8475	-103.407	-101.397	-117.116
					1.8525	-107.431	-107.698	-122.755		1.8525	-103.487	-95.0473	-106.071
					1.8575	-105.501	-106.036	-117.064		1.8575	-105.741	-93.5659	-108.059
					1.8625	-105.843	-104.956	-119.537		1.8625	-104.219	-92.1258	-105.351
					1.8675	-106.248	-101.96	-113.088		1.8675	-103.491	-103.79	-120.601
					1.8725	-105.208	-113.231	-131.365		1.8725	-105.673	-109.498	-122.215
					1.8775	-105.35	-120.401	-133.218		1.8775	-105.462	-91.8539	-102.204
					1.8825	-105.03	-101.736	-113.865		1.8825	-105.372	-100.976	-111.914
					1.8875	-104.455	-111.404	-122.583		1.8875	-105.794	-98.8205	-115.28
					1.8925	-104.229	-109.693	-126.256		1.8925	-106.698	-113.887	-127.833
					1.8975	-103.721	-124.873	-138.847		1.8975	-106.655	-105.224	-117.824
					1.9025	-103.589	-117.183	-129.686		1.9025	-104.958	-97.2201	-109.161
					1.9075	-103.215	-108.181	-120.301		1.9075	-110.136	-95.7516	-109.403
					1.9125	-102.126	-106.735	-120.394		1.9125	-110.272	-108.651	-124.223
					1.9175	-102.563	-119.646	-135.218		1.9175	-113.378	-107.312	-120.862
					1.9225	-101.874	-118.219	-131.971		1.9225	-115.696	-108.271	-123.565
					1.9275	-102.048	-119.231	-134.562		1.9275	-103.322	-92.1019	-105.541
					1.9325	-102.131	-103.094	-116.534		1.9325	-102.096	-93.8456	-105.99
					1.9375	-102.942	-104.837	-116.982		1.9375	-109.762	-94.7584	-109.264
					1.9425	-101.321	-109.143	-127.073		1.9425	-113.881	-108.578	-122.094
					1.9475	-101.313	-119.671	-133.082		1.9475	-116.234	-92.9312	-105.771
					1.9525	-101.257	-103.923	-116.762		1.9525	-113.457	-96.7315	-109.687
					1.9575	-101.212	-107.878	-120.944		1.9575	-111.912	-112.464	-127.716
					1.9625	-101.27	-124.003	-139.682		1.9625	-111.574	-96.9224	-105.739
					1.9675	-101.05	-107.937	-116.732		1.9675	-108.378	-86.9524	-100.974
					1.9725	-101.277	-97.9447	-111.967		1.9725	-108.78	-107.907	-127.598
					1.9775	-101.185	-118.871	-138.585		1.9775	-107.409	-118.47	-129.807
					1.9825	-101.13	-129.323	-140.437		1.9825	-106.778	-106.119	-116.987
					1.9875	-101.147	-117.099	-129.807		1.9875	-106.642	-120.465	-145.983
					1.9925	-101.079	-131.501	-156.695		1.9925	-102.973	-118.449	-132.403
					1.9975	-101.471	-129.351	-143.406		1.9975	-104.743	-124.36	-137.453
					2.0025	-101.304	-135.334	-148.309		2.0025	-104.702	-118.283	-134.357
					2.0075	-101.161	-129.275	-145.331		2.0075	-104.397	-112.08	-124.995
					2.0125	-101.128	-123.072	-135.985		2.0125	-104.02	-131.253	-145.271
					2.0175	-101.08	-142.249	-156.056		2.0175	-103.791	-110.333	-123.349
					2.0225	-101.038	-121.327	-134.352		2.0225	-103.446	-133.08	-157.282
					2.0275	-100.975	-144.084	-166.036		2.0275	-102.649	-126.276	-139.848
					2.0325	-101.076	-137.271	-150.721		2.0325	-102.873	-138.135	-159.449
					2.0375	-100.903	-149.135	-167.956		2.0375	-102.98	-134.418	-155.24
					2.0425	-100.783	-145.427	-165.579		2.0425	-102.194	-123.85	-140.145
					2.0475	-100.814	-136.926	-156.856		2.0475	-103.532	-109.806	-124.633
					2.0525	-100.407	-120.8	-135.633		2.0525	-102.747	-116.92	-152.858
					2.0575	-100.257	-127.972	-162.205		2.0575	-99.2953	-121.764	-162.505
					2.0625	-101.118	-132.783	-170.082		2.0625	-102.953	-127.14	-160.174
					2.0675	-100.058	-138.148	-167.304		2.0675	-102.691	-132.07	-153.967
					2.0725	-100.037	-143.056	-164.15		2.0725	-103.597	-121.716	-140.047
					2.0775	-99.7287	-132.71	-150.994		2.0775	-102.078	-120.994	-145.501
					2.0825	-99.8914	-131.986	-156.229		2.0825	-102.699	-126.309	-162.454
					2.0875	-99.4845	-137.296	-169.95		2.0875	-103.017	-133.32	-148.52
					2.0925	-99.4638	-144.334	-158.914		2.0925	-102.557	-119.442	-146.971
					2.0975	-99.3888	-130.435	-157.796		2.0975	-103.281	-123.46	-147.134
					2.1025	-98.9867	-134.451	-157.884		2.1025	-103.45	-129.531	-153.719
					2.1075	-98.9654	-140.532	-164.678		2.1075	-103.124	-140.243	-158.019
					2.1125	-98.9074	-151.201	-167.216		2.1125	-102.812	-133.232	-146.287
					2.1175	-98.8151	-148.059	-161.612		2.1175	-102.675	-135.898	-137.76
					2.1225	-98.7241	-144.924	-148.691		2.1225	-102.663	-111.236	-124.314
					2.1275	-98.5857	-122.226	-135.308		2.1275	-102.647	-136.469	-162.2
					2.1325	-98.4734	-147.747	-168.467		2.1325	-102.79	-155.611	-165.032
					2.1375	-98.2953	-165.034	-164		2.1375	-102.831	-126.954	-139.798
					2.1425	-98.1893	-137.951	-150.658		2.1425	-102.84	-135.622	-148.026
					2.1475	-98.0435	-146.591	-158.851		2.1475	-102.888	-121.226	-134.06
					2.1525	-97.9406	-132.225	-145.033		2.1525	-102.841	-137.899	-165.829
					2.1575	-97.809	-148.899	-169.809		2.1575	-102.736	-133.979	-146.85
					2.1625	-97.7329	-144.941	-157.524		2.1625	-102.658	-138.88	-151.885
					2.1675	-97.6086	-149.896	-162.429		2.1675	-102.553	-160.195	-165.46
					2.1725	-97.5349	-170.611	-167.572		2.1725	-102.378	-128.224	-138.525
					2.1775	-97.4276	-139.218	-149.538		2.1775	-102.217	-156.897	-166.641
					2.1825	-97.3649	-168.078	-171.037		2.1825	-102.004	-141.328	-154.693
					2.1875	-97.2661	-141.168	-153.733		2.1875	-101.813	-155.219	-164.708
					2.1925	-97.2112	-164.462	-170.506		2.1925	-101.567	-158.759	-164.037
					2.1975	-97.1215	-169.164	-168.361		2.1975	-101.378	-162.805	-165.995
					2.2025	-97.0685	-173.485	-171.764		2.2025	-101.144	-127.439	-139.605
					2.2075	-96.9788	-138.436	-150.517		2.2075	-100.959	-134.389	-156.378
					2.2125	-96.9282	-145.401	-162.924		2.2125	-100.72	-155.757	-161
					2.2175	-96.8418	-166.553	-168.587		2.2175	-100.561	-124.459	-137.319
					2.2225	-96.7883	-172.943	-168.515		2.2225	-100.345	-152.294	-163.801
					2.2275	-96.6964	-173.657	-170.093		2.2275	-100.205	-157.755	-157.847
					2.2325	-96.6418	-163.949	-159.148		2.2325	-100.032	-159.527	-155.998
					2.2375	-96.5454	-166.351	-163.263		2.2375	-99.9069	-143.347	-154.076
					2.2425	-96.4864	-154.279	-164.45		2.2425	-99.7535	-159.673	-159.223
					2.2475	-96.3855	-171.621	-166.97		2.2475	-99.6528	-161.297	-161.651
					2.2525	-96.3215	-173.175	-170.105		2.2525	-99.5224	-160.496	-163.517
					2.2575	-96.2152	-171.146	-169.216		2.2575	-99.4392	-161.144	-163.223
					2.2625	-96.1459	-173.219	-169.873		2.2625	-99.3277	-161.829	-163.702
					2.2675	-96.0347	-173.362	-169.473		2.2675	-99.2661	-132.117	-144.906
					2.2725	-95.9603	-143.103	-155.798		2.2725	-99.1734	-154.63	-164.328
					2.2775	-95.8444	-165.512	-165.462		2.2775	-99.1237	-161.579	-165.205
					2.2825	-95.7666	-172.364	-170.522		2.2825	-99.0518	-161.213	-164.496
					2.2875	-95.6452	-172.869	-170.385		2.2875	-99.022	-161.706	-163.761
					2.2925	-95.5623	-172.818	-167.894		2.2925	-98.9619	-161.371	-165.131
					2.2975	-95.4376	-172.807	-170.371		2.2975	-98.9534	-160.688	-163.926
					2.3025	-95.3497	-172.195	-168.923		2.3025	-98.9287	-161.547	-163.754
					2.3075	-95.2168	-173.81	-169.763		2.3075	-100.667	-141.28	-153.207
					2.3125	-96.7559	-152.263	-163.65		2.3125	-379.298	-379.298	-379.298

## Sheet: IR5
Measured					Old					New
Bands	63	1000	16000		Bands	63	1000	16000		Bands	63	1000	16000
RT60	1.06251	1.30122	0.925867		RT60	1.42957	1.59598	0.581192		RT60	1.42164	1.59598	0.581192
EDT	0	0	0		EDT	0	0	0		EDT	0	0	0
DRR	-40.4244	-9.25585	-10.462		DRR	-19.5273	2.02734	2.81274		DRR	-27.1284	-8.73741	-8.17929
C50	9.12796	6.90367	7.22882		C50	5.86978	8.80311	11.0281		C50	4.97226	4.08604	6.44475
C80	13.8409	10.0075	10.1313		C80	8.47237	11.8406	14.7525		C80	7.96456	7.59607	10.4989
D50	89.1077	83.0564	84.0841		D50	79.4386	88.3602	92.6853		D50	75.8579	71.927	81.517
TS	0.026704	0.034522	0.032757		TS	0.041415	0.018203	0.011466		TS	0.047831	0.043164	0.028773
Bands	63	1000	16000		Bands	63	1000	16000		Bands	63	1000	16000
0.0025	-22.6859	6.48378	-1.86197		0.0025	-30.5025	-6.3195	0.028319		0.0025	-19.7054	-6.56781	1.72041
0.0075	0.762527	5.47703	-1.92549		0.0075	-19.063	-16.3211	-9.27174		0.0075	-18.0867	-4.68612	0.223252
0.0125	2.61482	4.90671	-0.032552		0.0125	-32.0362	-15.6519	-10.7689		0.0125	-11.5497	-9.50043	-2.82187
0.0175	-0.60522	5.31161	0.252145		0.0175	-23.5098	-20.4735	-13.814		0.0175	-10.7236	-10.0103	-3.67895
0.0225	-2.51605	6.29673	-0.740839		0.0225	-21.9783	-21.0123	-14.671		0.0225	-13.5712	-10.5011	-4.10606
0.0275	-13.102	4.16041	-1.18231		0.0275	-24.1889	-21.4926	-15.0982		0.0275	-18.3593	-11.5507	-4.89817
0.0325	-1.57722	3.87207	-4.27906		0.0325	-28.8174	-22.5434	-15.8903		0.0325	-16.7787	-11.9301	-4.51778
0.0375	-1.87825	2.32792	-3.54328		0.0375	-27.309	-22.9221	-15.5099		0.0375	-16.3595	-11.5476	-5.38935
0.0425	-11.5738	0.875215	-4.12969		0.0425	-26.8896	-22.5397	-16.3814		0.0425	-18.2181	-10.3216	-5.9512
0.0475	-7.29094	-0.754499	-7.66746		0.0475	-28.5128	-21.3136	-16.9433		0.0475	-22.0173	-13.7314	-6.97649
0.0525	-9.86604	-1.67126	-8.85917		0.0525	-32.283	-24.7235	-17.9686		0.0525	-26.2708	-12.9625	-7.40015
0.0575	-6.19512	-1.44058	-8.28024		0.0575	-36.3581	-23.9546	-18.3922		0.0575	-18.0441	-12.3349	-8.6676
0.0625	-14.6884	-2.67409	-9.33371		0.0625	-28.738	-23.327	-19.6597		0.0625	-22.0625	-13.2618	-9.22979
0.0675	-16.6825	-4.61084	-11.9414		0.0675	-32.6189	-24.2539	-20.2219		0.0675	-21.9717	-13.6691	-9.41196
0.0725	-15.3013	-3.6575	-11.0874		0.0725	-32.6258	-24.6612	-20.4041		0.0725	-23.3143	-15.5963	-10.4121
0.0775	-10.9773	-6.6737	-11.8971		0.0775	-33.8791	-26.5884	-21.4042		0.0775	-22.3762	-16.7313	-10.4256
0.0825	-12.1744	-6.07736	-12.6076		0.0825	-32.8469	-27.7234	-21.4177		0.0825	-24.8746	-15.7806	-10.7687
0.0875	-16.4336	-5.65099	-12.1741		0.0875	-34.9466	-26.7727	-21.7608		0.0875	-30.9898	-17.2342	-12.0439
0.0925	-22.083	-7.52797	-13.1705		0.0925	-41.2888	-28.2263	-23.036		0.0925	-24.5679	-18.6459	-13.1444
0.0975	-24.2391	-8.39248	-11.7418		0.0975	-34.8947	-29.638	-24.1365		0.0975	-24.3069	-16.8763	-13.7749
0.1025	-18.2718	-7.80335	-11.8291		0.1025	-35.0179	-27.8684	-24.767		0.1025	-26.6498	-18.8705	-13.7419
0.1075	-19.044	-7.97942	-13.6296		0.1075	-36.6143	-29.8626	-24.734		0.1075	-26.9899	-19.5504	-14.64
0.1125	-26.2157	-9.08329	-15.2358		0.1125	-37.2446	-30.5425	-25.6321		0.1125	-28.1556	-19.7871	-15.2574
0.1175	-14.9974	-7.44413	-15.0224		0.1175	-38.2995	-30.7792	-26.2495		0.1175	-28.0182	-18.0484	-15.553
0.1225	-19.2603	-10.1031	-16.6223		0.1225	-38.5511	-29.0404	-26.5451		0.1225	-27.3982	-19.2381	-16.2294
0.1275	-28.3212	-8.43811	-16.3205		0.1275	-37.5885	-30.2302	-27.2215		0.1275	-28.1657	-19.317	-16.3771
0.1325	-25.7292	-11.9397	-16.1865		0.1325	-38.2841	-30.3091	-27.3692		0.1325	-28.5644	-21.1693	-17.659
0.1375	-30.0013	-10.8408	-17.812		0.1375	-38.4984	-32.1613	-28.6511		0.1375	-31.5856	-21.3015	-18.2498
0.1425	-22.8136	-12.5711	-19.344		0.1425	-41.193	-32.2936	-29.2419		0.1425	-27.5448	-21.6144	-18.9317
0.1475	-30.4254	-13.0376	-18.7066		0.1475	-37.7589	-32.6065	-29.9238		0.1475	-27.2321	-22.1441	-18.9648
0.1525	-21.805	-12.4895	-17.9733		0.1525	-37.3048	-33.1362	-29.9569		0.1525	-28.4697	-23.0125	-19.3126
0.1575	-22.5432	-11.6997	-19.2869		0.1575	-38.3357	-34.0047	-30.3047		0.1575	-29.1374	-21.5159	-20.1841
0.1625	-25.5603	-11.0612	-17.915		0.1625	-39.0409	-32.5081	-31.1762		0.1625	-33.0732	-22.3751	-20.3812
0.1675	-22.6194	-12.8827	-19.0815		0.1675	-42.2809	-33.3672	-31.3733		0.1675	-31.2305	-23.1732	-22.2232
0.1725	-18.3424	-14.4573	-20.527		0.1725	-41.0059	-34.1654	-33.2153		0.1725	-30.6829	-23.1222	-21.096
0.1775	-18.6889	-13.0592	-22.6225		0.1775	-40.8905	-34.1142	-32.0881		0.1775	-27.5892	-22.3496	-21.2204
0.1825	-28.4045	-16.244	-20.7744		0.1825	-37.614	-33.3417	-32.2125		0.1825	-29.9043	-24.1379	-22.9322
0.1875	-26.4556	-13.7857	-21.9044		0.1875	-39.5883	-35.13	-33.9243		0.1875	-31.4553	-25.0161	-24.551
0.1925	-24.9665	-13.2874	-20.5778		0.1925	-40.9344	-36.0081	-35.5431		0.1925	-30.2963	-25.9277	-24.3133
0.1975	-23.5702	-11.9564	-21.409		0.1975	-39.9652	-36.9197	-35.3054		0.1975	-33.415	-25.7502	-24.2694
0.2025	-28.7855	-13.4238	-22.9142		0.2025	-42.5336	-36.7423	-35.2615		0.2025	-34.0653	-24.4816	-24.0143
0.2075	-28.5326	-14.1117	-22.1999		0.2075	-43.0656	-35.4737	-35.0064		0.2075	-36.7448	-24.2534	-24.9133
0.2125	-23.4566	-16.9075	-22.0823		0.2125	-46.1084	-35.2455	-35.9054		0.2125	-34.7544	-26.3957	-26.134
0.2175	-24.5583	-16.971	-23.3134		0.2175	-44.6248	-37.3879	-37.1261		0.2175	-31.0557	-27.05	-25.1363
0.2225	-29.9868	-17.6999	-23.3584		0.2225	-40.8768	-38.0421	-36.1284		0.2225	-33.9322	-26.8288	-25.8352
0.2275	-24.543	-15.4472	-24.4552		0.2275	-43.4708	-37.821	-36.8273		0.2275	-33.2043	-27.2364	-27.361
0.2325	-23.042	-15.9269	-23.0687		0.2325	-42.828	-38.2285	-38.3531		0.2325	-32.8887	-27.146	-27.6447
0.2375	-22.1599	-18.9033	-25.5303		0.2375	-42.4718	-38.1381	-38.6368		0.2375	-30.5187	-26.9276	-27.371
0.2425	-27.326	-16.172	-23.7435		0.2425	-40.5978	-37.9197	-38.3631		0.2425	-32.3866	-28.5684	-28.8618
0.2475	-24.6193	-17.1421	-25.018		0.2475	-41.9764	-39.5605	-39.8539		0.2475	-33.3634	-28.2896	-28.5756
0.2525	-24.4395	-18.0279	-25.7614		0.2525	-42.8855	-39.2817	-39.5677		0.2525	-37.2006	-28.491	-28.6103
0.2575	-25.4915	-17.3016	-24.8003		0.2575	-46.3085	-39.4831	-39.6024		0.2575	-31.0948	-28.5206	-28.895
0.2625	-31.2713	-17.5766	-24.4582		0.2625	-41.053	-39.5127	-39.8871		0.2625	-36.8381	-27.8138	-29.8946
0.2675	-39.8228	-20.0269	-25.334		0.2675	-45.7558	-38.8059	-40.8867		0.2675	-33.2172	-29.8043	-30.1485
0.2725	-27.1108	-17.0491	-27.532		0.2725	-42.9877	-40.7964	-41.1406		0.2725	-35.2672	-29.3093	-30.1305
0.2775	-26.0486	-17.5641	-27.0524		0.2775	-44.555	-40.3014	-41.1226		0.2775	-32.8797	-29.8712	-31.191
0.2825	-38.9279	-17.5152	-28.2462		0.2825	-42.7069	-40.8632	-42.1831		0.2825	-35.4501	-30.3697	-31.8033
0.2875	-29.9923	-19.9725	-27.1585		0.2875	-44.7245	-41.3618	-42.7954		0.2875	-34.85	-29.5787	-32.367
0.2925	-30.963	-20.5706	-28.5454		0.2925	-44.336	-40.5708	-43.3591		0.2925	-38.2927	-28.898	-32.4232
0.2975	-32.4004	-17.9356	-25.8347		0.2975	-47.2575	-39.89	-43.4153		0.2975	-35.2259	-29.7998	-32.1182
0.3025	-28.5141	-19.8852	-28.2201		0.3025	-44.7877	-40.7919	-43.1103		0.3025	-36.1064	-29.4936	-34.1512
0.3075	-42.961	-17.6972	-28.2479		0.3075	-45.3117	-40.4857	-45.1433		0.3075	-37.4408	-30.4033	-32.8403
0.3125	-34.5925	-19.6621	-28.1214		0.3125	-46.3891	-41.3954	-43.8324		0.3125	-37.0825	-31.919	-33.7058
0.3175	-31.9577	-20.4906	-30.4818		0.3175	-46.1282	-42.9111	-44.6979		0.3175	-37.4951	-32.5877	-34.2264
0.3225	-33.0552	-19.3148	-28.2952		0.3225	-46.4254	-43.5798	-45.2185		0.3225	-34.0414	-30.9987	-32.9475
0.3275	-34.427	-21.1937	-30.5498		0.3275	-43.8404	-41.9908	-43.9396		0.3275	-34.0457	-30.5099	-35.6959
0.3325	-30.6973	-21.4344	-31.2222		0.3325	-44.1291	-41.502	-46.688		0.3325	-37.8973	-30.1157	-33.1804
0.3375	-35.4913	-21.3158	-32.9541		0.3375	-47.0338	-41.1078	-44.1725		0.3375	-38.5939	-31.9926	-34.7022
0.3425	-37.9028	-20.5188	-32.0448		0.3425	-47.9429	-42.9847	-45.6943		0.3425	-36.917	-32.4609	-36.786
0.3475	-36.4253	-24.1366	-32.642		0.3475	-46.243	-43.453	-47.7781		0.3475	-38.7777	-31.9692	-34.9788
0.3525	-40.1655	-21.2376	-31.2588		0.3525	-47.613	-42.9613	-45.9709		0.3525	-36.4271	-32.0985	-36.2341
0.3575	-33.3524	-19.8663	-30.979		0.3575	-45.8872	-43.0906	-47.2262		0.3575	-40.8067	-32.14	-39.333
0.3625	-34.0878	-22.7879	-33.169		0.3625	-49.4623	-43.1321	-50.3252		0.3625	-38.2821	-32.1277	-37.6692
0.3675	-33.5676	-21.302	-32.5562		0.3675	-47.6792	-43.1198	-48.6613		0.3675	-41.5435	-34.5574	-36.4489
0.3725	-37.7909	-21.6978	-33.213		0.3725	-50.2143	-45.5495	-47.441		0.3725	-36.3918	-32.7147	-38.2592
0.3775	-36.7467	-24.8489	-32.3541		0.3775	-45.9651	-43.7068	-49.2513		0.3775	-41.0837	-32.7831	-38.9084
0.3825	-32.1566	-22.3709	-33.3083		0.3825	-50.3034	-43.7752	-49.9005		0.3825	-41.3412	-34.3872	-39.5219
0.3875	-38.2304	-22.4907	-34.2238		0.3875	-50.0944	-45.3793	-50.514		0.3875	-39.7634	-33.7509	-39.3344
0.3925	-33.4373	-24.4186	-32.2747		0.3925	-48.8771	-44.743	-50.3265		0.3925	-40.6708	-36.1378	-39.17
0.3975	-32.2197	-22.9243	-36.1872		0.3975	-49.6412	-47.1299	-50.1621		0.3975	-38.8636	-32.2799	-39.1379
0.4025	-33.8613	-21.5885	-32.8349		0.4025	-48.2206	-43.272	-50.13		0.4025	-35.8543	-34.2053	-38.6494
0.4075	-33.9082	-24.4117	-33.7861		0.4075	-45.7109	-45.1974	-49.6415		0.4075	-39.5347	-36.1512	-40.7162
0.4125	-34.9322	-25.6418	-36.4227		0.4125	-48.9581	-47.1433	-51.7083		0.4125	-42.674	-34.477	-40.6603
0.4175	-35.4415	-23.645	-36.1366		0.4175	-51.5168	-45.4691	-51.6524		0.4175	-40.8215	-33.58	-40.6121
0.4225	-33.1062	-26.3941	-35.6282		0.4225	-50.1435	-44.5721	-51.6042		0.4225	-40.1225	-33.8965	-39.1804
0.4275	-31.0163	-25.3716	-34.0853		0.4275	-49.5578	-44.8886	-50.1725		0.4275	-42.1451	-35.5789	-41.5147
0.4325	-36.2301	-26.0696	-36.8424		0.4325	-51.5099	-46.571	-52.5068		0.4325	-40.7647	-35.4698	-43.3644
0.4375	-35.3101	-25.2076	-37.8485		0.4375	-50.2439	-46.4619	-54.3565		0.4375	-39.9928	-35.132	-42.9419
0.4425	-38.4596	-24.6387	-36.5811		0.4425	-49.5654	-46.1241	-53.934		0.4425	-40.953	-37.0548	-43.825
0.4475	-41.5041	-26.8258	-35.9794		0.4475	-50.5567	-48.0469	-54.8171		0.4475	-42.038	-36.4403	-43.2545
0.4525	-43.8408	-24.629	-35.7183		0.4525	-51.6162	-47.4324	-54.2466		0.4525	-39.3311	-36.2325	-42.1775
0.4575	-35.7011	-26.8881	-35.8062		0.4575	-49.1628	-47.2246	-53.1696		0.4575	-44.7139	-38.2405	-42.5897
0.4625	-32.762	-25.8805	-36.8582		0.4625	-53.7137	-49.2326	-53.5818		0.4625	-41.1397	-38.2381	-44.565
0.4675	-35.8646	-27.6584	-39.7681		0.4675	-50.8158	-49.2302	-55.5571		0.4675	-43.2898	-38.9656	-46.47
0.4725	-44.697	-26.9286	-37.084		0.4725	-52.6443	-49.9577	-57.4621		0.4725	-43.7069	-36.6014	-44.9584
0.4775	-37.7804	-27.5826	-37.7728		0.4775	-53.121	-47.5935	-55.9505		0.4775	-41.8009	-36.2705	-47.1328
0.4825	-43.9321	-27.7141	-37.3158		0.4825	-51.4939	-47.2626	-58.1249		0.4825	-43.638	-37.7973	-46.4417
0.4875	-39.683	-24.9583	-37.5519		0.4875	-53.0135	-48.7894	-57.4338		0.4875	-40.8657	-40.3466	-47.5138
0.4925	-39.5351	-26.003	-38.4199		0.4925	-50.6434	-51.3387	-58.5059		0.4925	-44.0815	-37.5129	-46.4041
0.4975	-38.8875	-27.8425	-40.6488		0.4975	-53.4122	-48.505	-57.3962		0.4975	-44.0174	-38.9485	-45.3185
0.5025	-39.6677	-27.0716	-39.4258		0.5025	-53.4442	-49.9406	-56.3106		0.5025	-43.936	-37.5456	-47.042
0.5075	-38.6409	-26.8323	-39.7061		0.5075	-53.3364	-48.5377	-58.0341		0.5075	-45.002	-38.7188	-44.9574
0.5125	-35.7145	-26.5222	-39.5766		0.5125	-54.2064	-49.7109	-55.9495		0.5125	-42.8958	-37.8153	-45.3376
0.5175	-35.0022	-28.1889	-40.0984		0.5175	-52.8016	-48.8074	-56.3297		0.5175	-44.992	-39.2128	-49.36
0.5225	-37.3092	-29.1207	-41.2667		0.5225	-54.7275	-50.2049	-60.3521		0.5225	-45.4951	-37.8661	-48.9701
0.5275	-36.9186	-27.6873	-40.6259		0.5275	-54.745	-48.8582	-59.9622		0.5275	-48.4826	-39.208	-46.4258
0.5325	-40.1001	-29.8237	-42.62		0.5325	-57.2598	-50.2002	-57.4179		0.5325	-46.5586	-37.3369	-47.4929
0.5375	-44.6134	-31.4838	-41.4446		0.5375	-55.7282	-48.329	-58.485		0.5375	-46.0742	-38.0668	-47.9595
0.5425	-36.176	-29.0232	-42.7915		0.5425	-55.1837	-49.0589	-58.9516		0.5425	-42.7637	-36.5764	-48.4479
0.5475	-41.7185	-27.8418	-41.4477		0.5475	-52.5031	-47.5685	-59.44		0.5475	-46.3824	-42.1845	-50.2382
0.5525	-45.0703	-32.1006	-41.8091		0.5525	-55.55	-53.1766	-61.2303		0.5525	-49.49	-39.2665	-48.7371
0.5575	-40.8993	-31.1385	-43.5283		0.5575	-57.8975	-50.2586	-59.7292		0.5575	-46.7622	-41.6281	-50.6133
0.5625	-35.4464	-28.8784	-39.7494		0.5625	-55.7434	-52.6202	-61.6054		0.5625	-48.9416	-40.5643	-51.0952
0.5675	-39.3649	-29.8828	-42.2358		0.5675	-57.7715	-51.5564	-62.0873		0.5675	-50.1304	-41.0254	-47.8139
0.5725	-34.2739	-29.0851	-42.8812		0.5725	-58.565	-52.0175	-58.806		0.5725	-49.3476	-42.3244	-51.595
0.5775	-39.1071	-30.7747	-42.2335		0.5775	-58.0917	-53.3165	-62.5871		0.5775	-47.2483	-41.5809	-49.7363
0.5825	-40.2464	-31.2031	-41.9135		0.5825	-56.2664	-52.573	-60.7284		0.5825	-49.0991	-41.3065	-51.0941
0.5875	-43.9967	-31.6652	-42.8622		0.5875	-58.1785	-52.2986	-62.0861		0.5875	-45.9388	-41.1154	-53.3234
0.5925	-40.8802	-31.1178	-43.8315		0.5925	-55.3137	-52.1075	-64.3155		0.5925	-48.8048	-42.7839	-52.7513
0.5975	-46.4073	-31.4382	-44.3735		0.5975	-57.5593	-53.7759	-63.7434		0.5975	-49.8886	-40.5528	-51.2662
0.6025	-45.2426	-33.7471	-44.3801		0.6025	-58.4094	-51.5449	-62.2583		0.6025	-48.3549	-40.682	-49.7193
0.6075	-41.4161	-30.523	-43.5027		0.6075	-57.2679	-51.6742	-60.7114		0.6075	-48.5844	-41.6581	-53.6788
0.6125	-42.6211	-30.53	-43.062		0.6125	-57.6973	-52.6502	-64.6709		0.6125	-48.9198	-46.5894	-56.7944
0.6175	-44.4048	-34.1212	-43.5651		0.6175	-57.8821	-57.5815	-67.7865		0.6175	-50.7947	-42.8061	-56.0621
0.6225	-40.6254	-32.9867	-44.9098		0.6225	-59.6379	-53.7982	-67.0542		0.6225	-49.4853	-43.7979	-54.514
0.6275	-40.606	-31.6395	-44.8211		0.6275	-58.711	-54.79	-65.5061		0.6275	-47.7031	-43.2573	-53.7942
0.6325	-41.5375	-33.0309	-45.293		0.6325	-57.1549	-54.2494	-64.7863		0.6325	-48.9456	-42.6249	-56.5131
0.6375	-43.5351	-31.5217	-43.5074		0.6375	-58.1713	-53.617	-67.5052		0.6375	-49.8462	-44.8363	-55.4824
0.6425	-43.5627	-31.4942	-44.8863		0.6425	-59.1328	-55.8284	-66.4745		0.6425	-49.561	-45.4298	-57.3389
0.6475	-38.0933	-31.3531	-45.4608		0.6475	-58.8446	-56.4219	-68.331		0.6475	-50.2939	-44.3049	-56.9488
0.6525	-43.5216	-34.8137	-44.8263		0.6525	-59.5964	-55.297	-67.9409		0.6525	-53.7042	-44.8154	-55.5512
0.6575	-47.887	-35.2595	-46.6804		0.6575	-62.2615	-55.8075	-66.5433		0.6575	-52.4692	-44.901	-57.6788
0.6625	-44.2967	-35.402	-45.0914		0.6625	-61.5137	-55.8931	-68.6709		0.6625	-51.5061	-43.5256	-57.6795
0.6675	-45.3986	-34.764	-46.6278		0.6675	-60.5975	-54.5177	-68.6716		0.6675	-49.7199	-44.6461	-57.4676
0.6725	-43.4229	-33.2037	-44.96		0.6725	-59.3042	-55.6382	-68.4597		0.6725	-50.1123	-46.1283	-55.7376
0.6775	-42.0507	-35.2156	-46.4379		0.6775	-59.8363	-57.1204	-66.7297		0.6775	-50.9481	-42.5918	-55.9277
0.6825	-40.6528	-33.1515	-46.8582		0.6825	-60.5894	-53.5839	-66.9197		0.6825	-56.1554	-47.5443	-57.4663
0.6875	-43.3601	-31.5043	-46.6512		0.6875	-65.4167	-58.5364	-68.4584		0.6875	-56.2974	-46.1699	-57.8372
0.6925	-47.6015	-34.0145	-47.6575		0.6925	-65.0699	-57.162	-68.8293		0.6925	-53.0736	-45.2691	-56.8187
0.6975	-45.3172	-33.3969	-46.3695		0.6975	-62.5943	-56.2612	-67.8108		0.6975	-51.5576	-42.9084	-56.7359
0.7025	-42.8265	-37.5851	-46.215		0.7025	-61.3495	-53.9005	-67.728		0.7025	-51.0678	-45.1981	-57.2713
0.7075	-42.0278	-36.4954	-46.2838		0.7075	-61.0512	-56.1903	-68.2634		0.7075	-51.8781	-47.2804	-59.9715
0.7125	-42.9348	-36.6647	-49.4425		0.7125	-61.9315	-58.2725	-70.9636		0.7125	-50.9611	-48.1681	-60.2
0.7175	-41.9976	-33.9835	-47.0959		0.7175	-60.7885	-59.1602	-71.1921		0.7175	-52.2755	-45.2925	-57.5612
0.7225	-41.1287	-36.0958	-47.4955		0.7225	-61.9784	-56.2846	-68.5533		0.7225	-50.9524	-44.8808	-57.8714
0.7275	-41.4247	-35.0615	-46.1391		0.7275	-60.8356	-55.8729	-68.8635		0.7275	-54.1048	-45.1873	-56.5978
0.7325	-42.352	-36.4971	-48.5453		0.7325	-63.7527	-56.1794	-67.5899		0.7325	-53.3343	-48.6691	-61.2371
0.7375	-44.923	-37.0582	-47.9418		0.7375	-62.9291	-59.6612	-72.2293		0.7375	-55.8212	-47.7771	-61.2416
0.7425	-47.5072	-35.3446	-48.0956		0.7425	-65.7892	-58.7692	-72.2337		0.7425	-54.0015	-48.0337	-60.4809
0.7475	-53.4913	-34.9537	-47.219		0.7475	-63.6192	-59.0258	-71.473		0.7475	-55.718	-48.2401	-59.3788
0.7525	-42.3694	-35.9249	-48.3382		0.7525	-64.9104	-59.2322	-70.3709		0.7525	-56.344	-46.0597	-58.1469
0.7575	-46.9068	-36.4343	-47.8066		0.7575	-65.6146	-57.0518	-69.139		0.7575	-53.8064	-45.3907	-57.4719
0.7625	-47.8158	-36.4812	-47.1301		0.7625	-63.3744	-56.3828	-68.464		0.7625	-54.3939	-46.0624	-59.038
0.7675	-47.0412	-36.405	-49.9238		0.7675	-63.831	-57.0545	-70.0301		0.7675	-55.3678	-48.8848	-59.9016
0.7725	-53.0026	-35.822	-49.3906		0.7725	-64.6068	-59.8769	-70.8937		0.7725	-56.5473	-48.4123	-61.4526
0.7775	-49.7129	-36.7033	-49.5576		0.7775	-65.6398	-59.4044	-72.4447		0.7775	-54.8871	-49.2577	-64.8393
0.7825	-53.8813	-36.7938	-47.7421		0.7825	-64.3955	-60.2498	-75.8314		0.7825	-55.5483	-48.8336	-62.5703
0.7875	-44.4152	-38.3317	-49.2014		0.7875	-64.9457	-59.8257	-73.5624		0.7875	-55.0092	-47.6149	-62.0167
0.7925	-46.4699	-37.4139	-49.0498		0.7925	-64.5939	-58.607	-73.0088		0.7925	-56.4598	-46.6265	-61.7824
0.7975	-49.6412	-35.4275	-48.9061		0.7975	-65.4992	-57.6186	-72.7745		0.7975	-60.2328	-48.5514	-61.4246
0.8025	-49.6995	-34.4094	-47.6669		0.8025	-68.7222	-59.5435	-72.4167		0.8025	-54.5043	-49.6654	-63.4754
0.8075	-45.5682	-35.2594	-50.1081		0.8075	-64.3813	-60.6575	-74.4675		0.8075	-53.6818	-49.4997	-62.8882
0.8125	-50.8129	-36.3267	-50.0992		0.8125	-63.3497	-60.4918	-73.8803		0.8125	-56.4018	-51.3778	-64.877
0.8175	-46.8262	-38.3141	-49.6479		0.8175	-65.5368	-62.3699	-75.8691		0.8175	-55.0648	-52.0293	-66.4143
0.8225	-41.2412	-36.5731	-48.2626		0.8225	-64.3953	-63.0214	-77.4064		0.8225	-55.6845	-49.5761	-63.2301
0.8275	-46.0791	-37.0221	-48.297		0.8275	-64.9865	-60.5682	-74.2222		0.8275	-58.6957	-50.7294	-63.0643
0.8325	-45.2817	-37.6729	-49.6159		0.8325	-67.494	-61.7215	-74.0564		0.8325	-58.9593	-50.6077	-63.9279
0.8375	-44.0475	-36.9376	-48.7245		0.8375	-67.6781	-61.5998	-74.92		0.8375	-58.8813	-52.2322	-65.4828
0.8425	-47.0748	-40.0735	-49.2003		0.8425	-67.6239	-63.2243	-76.4749		0.8425	-57.3718	-49.9004	-64.3775
0.8475	-44.6104	-38.1797	-49.9606		0.8475	-66.5057	-60.8925	-75.3696		0.8475	-56.4164	-51.6613	-66.7471
0.8525	-47.1603	-36.4551	-49.7445		0.8525	-65.9047	-62.6534	-77.7392		0.8525	-57.4332	-56.0892	-68.7882
0.8575	-49.9166	-37.412	-49.4572		0.8575	-66.8624	-67.0813	-79.7803		0.8575	-59.5286	-49.2082	-63.0024
0.8625	-52.364	-35.4653	-49.3292		0.8625	-68.9593	-60.2003	-73.9945		0.8625	-59.6693	-52.0481	-64.5536
0.8675	-48.8345	-34.9266	-48.8954		0.8675	-68.9843	-63.0402	-75.5457		0.8675	-58.0312	-54.4985	-68.2295
0.8725	-45.0769	-34.4347	-49.5704		0.8725	-67.5179	-65.4906	-79.2216		0.8725	-58.3287	-55.1256	-66.1805
0.8775	-46.6176	-34.9028	-49.6323		0.8775	-68.073	-66.1177	-77.1726		0.8775	-58.1695	-52.7868	-65.2586
0.8825	-43.9141	-36.2441	-49.7355		0.8825	-68.1708	-63.7789	-76.2507		0.8825	-60.7967	-52.4432	-66.9679
0.8875	-47.6049	-36.8568	-50.2931		0.8875	-71.0611	-63.4353	-77.96		0.8875	-65.1592	-52.9961	-65.0597
0.8925	-48.1861	-37.9078	-50.1741		0.8925	-74.5987	-63.9882	-76.0518		0.8925	-62.4382	-53.3374	-67.3899
0.8975	-47.1019	-39.0406	-50.2382		0.8975	-72.0386	-64.3295	-78.382		0.8975	-61.5788	-53.5873	-68.5649
0.9025	-53.1835	-38.3737	-49.2916		0.9025	-71.4665	-64.5794	-79.557		0.9025	-64.7963	-51.9728	-65.6246
0.9075	-56.9267	-37.9779	-49.9658		0.9075	-73.752	-62.9649	-76.6167		0.9075	-60.8856	-53.6144	-65.3217
0.9125	-59.2353	-36.9282	-49.7493		0.9125	-70.7423	-64.6065	-76.3138		0.9125	-63.2148	-52.0909	-68.1154
0.9175	-56.9348	-34.3719	-50.0504		0.9175	-73.1839	-63.083	-79.1075		0.9175	-62.5433	-55.0293	-66.8491
0.9225	-51.1713	-39.786	-51.1496		0.9225	-72.3378	-66.0214	-77.8412		0.9225	-60.0775	-53.5229	-66.4592
0.9275	-47.7648	-34.293	-50.0247		0.9275	-70.2723	-64.515	-77.4513		0.9275	-65.1689	-55.4279	-66.8361
0.9325	-43.9074	-37.5383	-50.3552		0.9325	-74.6135	-66.4199	-77.8282		0.9325	-61.1513	-53.6614	-68.5122
0.9375	-46.1334	-39.7162	-48.8607		0.9375	-71.2422	-64.6535	-79.5043		0.9375	-65.7822	-56.5217	-68.1137
0.9425	-46.6736	-38.5028	-50.1532		0.9425	-75.7307	-67.5138	-79.1058		0.9425	-65.0616	-52.6664	-65.7805
0.9475	-56.3513	-36.2949	-50.6061		0.9475	-74.9387	-63.6585	-76.7726		0.9475	-64.1862	-53.4231	-66.8096
0.9525	-50.6917	-37.6049	-50.6629		0.9525	-74.0396	-64.4152	-77.8017		0.9525	-64.0064	-57.6279	-68.9877
0.9575	-49.4262	-39.3717	-48.5893		0.9575	-74.1303	-68.62	-79.9798		0.9575	-69.608	-55.481	-67.725
0.9625	-46.8991	-40.5675	-50.505		0.9625	-78.2533	-66.4731	-78.717		0.9625	-66.4748	-55.6668	-68.5008
0.9675	-47.1306	-38.6905	-49.3585		0.9675	-76.0298	-66.6589	-79.4929		0.9675	-64.7229	-53.8219	-66.99
0.9725	-44.364	-38.6282	-49.7149		0.9725	-74.2591	-64.814	-77.9821		0.9725	-63.3874	-56.1173	-68.7342
0.9775	-47.7504	-37.8963	-50.3303		0.9775	-73.0542	-67.1094	-79.7262		0.9775	-71.4172	-57.8056	-67.6249
0.9825	-45.3489	-37.0916	-50.2902		0.9825	-79.5282	-68.7977	-78.617		0.9825	-66.9395	-56.0852	-68.1265
0.9875	-44.7328	-38.9047	-50.19		0.9875	-76.098	-67.0773	-79.1186		0.9875	-65.8808	-54.0747	-68.7275
0.9925	-47.079	-35.6811	-49.7349		0.9925	-75.2339	-65.0668	-79.7196		0.9925	-65.2864	-56.798	-68.4152
0.9975	-47.1942	-37.9826	-50.207		0.9975	-75.0995	-67.7901	-79.4073		0.9975	-65.0667	-56.102	-69.6841
1.0025	-51.3716	-40.1981	-49.8918		1.0025	-74.5982	-67.0941	-80.6762		1.0025	-68.4842	-56.4285	-72.623
1.0075	-43.5989	-36.6028	-49.5371		1.0075	-77.6667	-67.4206	-83.6151		1.0075	-64.1129	-56.5139	-71.4999
1.0125	-47.8741	-36.484	-50.3859		1.0125	-73.9279	-67.506	-82.492		1.0125	-66.8975	-59.9183	-74.5729
1.0175	-47.0202	-34.4991	-49.2532		1.0175	-75.6749	-70.9104	-85.565		1.0175	-66.9272	-55.9005	-70.1923
1.0225	-42.4263	-37.2897	-50.7778		1.0225	-75.7441	-66.8926	-81.1844		1.0225	-70.6943	-57.3942	-71.9542
1.0275	-42.8812	-37.8988	-49.1805		1.0275	-78.5209	-68.3863	-82.9463		1.0275	-69.4369	-60.3977	-72.705
1.0325	-48.6523	-33.2315	-49.7867		1.0325	-78.2683	-71.3898	-83.6971		1.0325	-72.4255	-59.427	-73.6787
1.0375	-49.0237	-37.9329	-49.8294		1.0375	-79.9126	-70.4191	-84.6709		1.0375	-72.7527	-58.5639	-71.3863
1.0425	-379.298	-379.298	-379.298		1.0425	-79.8821	-69.556	-82.3783		1.0425	-72.2545	-53.3984	-70.3223
1.0475	-379.298	-379.298	-379.298		1.0475	-79.7563	-64.3905	-81.3144		1.0475	-69.3641	-57.3636	-68.3165
1.0525	-379.298	-379.298	-379.298		1.0525	-77.8147	-68.3557	-79.3086		1.0525	-68.5617	-57.6152	-71.5784
1.0575	-379.298	-379.298	-379.298		1.0575	-77.115	-68.6073	-82.5705		1.0575	-68.9538	-59.791	-72.8944
1.0625	-379.298	-379.298	-379.298		1.0625	-77.6585	-70.7831	-83.8865		1.0625	-72.2624	-60.1375	-74.0258
1.0675	-379.298	-379.298	-379.298		1.0675	-81.0626	-71.1296	-85.0179		1.0675	-77.1268	-58.3873	-72.3843
1.0725	-379.298	-379.298	-379.298		1.0725	-83.2467	-69.3794	-83.3764		1.0725	-72.0615	-59.4612	-74.7483
1.0775	-379.298	-379.298	-379.298		1.0775	-80.1356	-70.4533	-85.7404		1.0775	-72.7388	-59.7295	-72.2081
1.0825	-379.298	-379.298	-379.298		1.0825	-80.8028	-70.7216	-83.2001		1.0825	-69.576	-59.9661	-74.2769
1.0875	-379.298	-379.298	-379.298		1.0875	-78.5061	-70.9582	-85.2691		1.0875	-69.7252	-56.5339	-69.9454
1.0925	-379.298	-379.298	-379.298		1.0925	-79.2725	-67.526	-80.9375		1.0925	-72.8836	-61.125	-74.5437
1.0975	-379.298	-379.298	-379.298		1.0975	-81.8732	-72.1171	-85.5358		1.0975	-71.8178	-61.2154	-75.6519
1.1025	-379.298	-379.298	-379.298		1.1025	-80.853	-72.2075	-86.644		1.1025	-74.1323	-62.7176	-76.1649
1.1075	-379.298	-379.298	-379.298		1.1075	-83.3632	-73.7097	-87.1571		1.1075	-71.5479	-62.0958	-74.9074
1.1125	-379.298	-379.298	-379.298		1.1125	-80.8648	-73.0879	-85.8996		1.1125	-74.8844	-59.9952	-77.4689
1.1175	-379.298	-379.298	-379.298		1.1175	-84.1612	-70.9873	-88.4611		1.1175	-68.9318	-58.3147	-72.1411
1.1225	-379.298	-379.298	-379.298		1.1225	-78.7838	-69.3069	-83.1332		1.1225	-71.9538	-63.8658	-78.4992
1.1275	-379.298	-379.298	-379.298		1.1275	-81.8551	-74.8579	-89.4914		1.1275	-75.5483	-64.6558	-75.3353
1.1325	-379.298	-379.298	-379.298		1.1325	-84.9795	-75.6479	-86.3274		1.1325	-72.5594	-60.8369	-77.1285
1.1375	-379.298	-379.298	-379.298		1.1375	-82.3809	-71.829	-88.1206		1.1375	-71.7585	-65.8189	-81.4073
1.1425	-379.298	-379.298	-379.298		1.1425	-81.7166	-76.811	-92.3994		1.1425	-73.1106	-66.4675	-78.3342
1.1475	-379.298	-379.298	-379.298		1.1475	-83.1764	-77.4596	-89.3263		1.1475	-74.7899	-59.0404	-72.4305
1.1525	-379.298	-379.298	-379.298		1.1525	-84.5288	-70.0325	-83.4226		1.1525	-72.167	-65.2416	-77.2006
1.1575	-379.298	-379.298	-379.298		1.1575	-82.3079	-76.2336	-88.1928		1.1575	-73.5988	-58.1273	-70.9183
1.1625	-379.298	-379.298	-379.298		1.1625	-83.7525	-69.1194	-81.9104		1.1625	-75.0285	-61.8082	-77.9056
1.1675	-379.298	-379.298	-379.298		1.1675	-85.3024	-72.8003	-88.8977		1.1675	-71.2548	-67.0704	-82.519
1.1725	-379.298	-379.298	-379.298		1.1725	-81.5566	-78.0624	-93.511		1.1725	-73.5137	-66.0128	-78.6048
1.1775	-379.298	-379.298	-379.298		1.1775	-83.6287	-77.0049	-89.597		1.1775	-74.3938	-64.8876	-79.3661
1.1825	-379.298	-379.298	-379.298		1.1825	-84.2295	-75.8797	-90.3582		1.1825	-75.728	-65.6213	-79.7012
1.1875	-379.298	-379.298	-379.298		1.1875	-85.3982	-76.6134	-90.6933		1.1875	-75.3287	-61.0537	-74.097
1.1925	-379.298	-379.298	-379.298		1.1925	-84.8938	-72.0458	-85.0891		1.1925	-74.4415	-67.9297	-81.8987
1.1975	-379.298	-379.298	-379.298		1.1975	-84.6131	-78.9218	-92.891		1.1975	-72.7051	-66.804	-82.2473
1.2025	-379.298	-379.298	-379.298		1.2025	-82.5269	-77.7961	-93.2391		1.2025	-75.0137	-65.0435	-76.7454
1.2075	-379.298	-379.298	-379.298		1.2075	-84.421	-76.0356	-87.7375		1.2075	-73.2541	-66.578	-79.3628
1.2125	-379.298	-379.298	-379.298		1.2125	-82.7786	-77.5701	-90.3549		1.2125	-83.1076	-65.9426	-79.9805
1.2175	-379.298	-379.298	-379.298		1.2175	-90.6128	-76.9347	-90.9727		1.2175	-79.6704	-60.4449	-75.9401
1.2225	-379.298	-379.298	-379.298		1.2225	-87.9097	-71.437	-86.9323		1.2225	-81.1469	-66.3166	-80.8576
1.2275	-379.298	-379.298	-379.298		1.2275	-88.9698	-77.3087	-91.8499		1.2275	-78.9537	-67.3388	-81.6568
1.2325	-379.298	-379.298	-379.298		1.2325	-87.3053	-78.3309	-92.6491		1.2325	-81.4191	-66.3779	-82.1671
1.2375	-379.298	-379.298	-379.298		1.2375	-89.1414	-77.37	-93.1592		1.2375	-75.1089	-63.5836	-77.627
1.2425	-379.298	-379.298	-379.298		1.2425	-84.4424	-74.5756	-88.6191		1.2425	-76.3743	-68.6232	-80.3686
1.2475	-379.298	-379.298	-379.298		1.2475	-85.6102	-79.6153	-91.3607		1.2475	-75.9019	-63.6064	-76.8339
					1.2525	-84.5907	-74.5985	-87.826		1.2525	-78.8861	-67.1742	-82.2397
					1.2575	-86.9456	-78.1663	-93.2317		1.2575	-79.3489	-67.0709	-81.7788
					1.2625	-87.3429	-78.063	-92.7708		1.2625	-82.9938	-67.5178	-79.2857
					1.2675	-89.6714	-78.5099	-90.2778		1.2675	-80.144	-68.3314	-80.7801
					1.2725	-87.6532	-79.3235	-91.7723		1.2725	-81.9282	-66.4828	-80.3335
					1.2775	-89.0312	-77.4749	-91.3255		1.2775	-81.5745	-66.1395	-77.8159
					1.2825	-88.7282	-77.1316	-88.808		1.2825	-78.7677	-65.894	-80.1062
					1.2875	-87.2729	-76.8861	-91.0983		1.2875	-79.144	-67.7074	-80.1862
					1.2925	-87.6477	-78.6995	-91.1783		1.2925	-80.9404	-70.4695	-84.3516
					1.2975	-89.2854	-81.4616	-95.3437		1.2975	-79.2424	-64.8329	-79.0557
					1.3025	-87.8039	-75.8251	-90.0478		1.3025	-79.6287	-70.2588	-83.7282
					1.3075	-88.2816	-81.2509	-94.7204		1.3075	-80.7705	-71.9422	-84.0912
					1.3125	-89.2167	-82.9343	-95.0833		1.3125	-81.6753	-75.411	-87.1808
					1.3175	-90.2592	-86.4031	-98.1728		1.3175	-81.3708	-73.3722	-84.5593
					1.3225	-90.1726	-84.3643	-95.5516		1.3225	-80.4964	-69.1421	-82.0031
					1.3275	-89.9472	-80.1342	-92.9951		1.3275	-82.0791	-71.5061	-88.2352
					1.3325	-91.1288	-82.4981	-99.2275		1.3325	-82.0202	-74.1434	-86.6585
					1.3375	-91.4634	-85.1355	-97.651		1.3375	-81.7221	-73.7786	-87.8774
					1.3425	-91.2884	-84.7707	-98.8692		1.3425	-80.1694	-69.1084	-82.5431
					1.3475	-90.5109	-80.1005	-93.5353		1.3475	-81.1168	-70.0402	-85.8051
					1.3525	-91.9885	-81.0323	-96.7973		1.3525	-80.0091	-72.5195	-86.6709
					1.3575	-90.4345	-83.5116	-97.663		1.3575	-82.174	-74.2936	-89.2398
					1.3625	-92.4392	-85.2857	-100.232		1.3625	-82.6681	-71.521	-85.4107
					1.3675	-93.0586	-82.5132	-96.4029		1.3675	-82.6914	-73.5418	-90.6942
					1.3725	-93.3084	-84.5339	-101.686		1.3725	-82.6144	-71.1472	-85.0261
					1.3775	-93.4398	-82.1392	-96.0181		1.3775	-83.9473	-69.1011	-85.0231
					1.3825	-94.5045	-80.0932	-96.0152		1.3825	-86.0277	-74.389	-86.6663
					1.3875	-96.8872	-85.381	-97.6582		1.3875	-82.1652	-75.2267	-89.0056
					1.3925	-92.9201	-86.2188	-99.9978		1.3925	-81.6502	-71.9447	-84.2613
					1.3975	-92.2232	-82.9368	-95.2532		1.3975	-83.0657	-74.4442	-84.7208
					1.4025	-93.6448	-85.4362	-95.7126		1.4025	-78.9669	-61.4452	-76.5285
					1.4075	-89.509	-72.4373	-87.5206		1.4075	-82.7719	-70.4894	-86.179
					1.4125	-93.2024	-81.4816	-97.1714		1.4125	-83.948	-71.6822	-86.9902
					1.4175	-94.2151	-82.6743	-97.9828		1.4175	-82.6398	-69.3556	-81.9215
					1.4225	-92.6999	-80.3477	-92.9136		1.4225	-86.9089	-71.862	-87.934
					1.4275	-96.3296	-82.8541	-98.9261		1.4275	-85.7462	-71.3406	-84.7487
					1.4325	-95.0326	-82.3327	-95.7408		1.4325	-89.0981	-73.7101	-87.5275
					1.4375	-97.5159	-84.7023	-98.5195		1.4375	-86.4021	-66.1091	-79.525
					1.4425	-95.6635	-77.1012	-90.517		1.4425	-89.0613	-69.9176	-83.1069
					1.4475	-97.9537	-80.9097	-94.0987		1.4475	-87.245	-74.6788	-87.2062
					1.4525	-96.4546	-85.6709	-98.198		1.4525	-86.0913	-65.4328	-79.0653
					1.4575	-95.1904	-76.4249	-90.0574		1.4575	-85.1404	-74.0157	-86.5173
					1.4625	-94.3096	-85.0079	-97.5095		1.4625	-85.9329	-68.6672	-82.3043
					1.4675	-94.6259	-79.6593	-93.2965		1.4675	-88.4342	-66.4105	-79.2591
					1.4725	-96.7595	-77.4026	-90.2512		1.4725	-87.5787	-76.0136	-89.4255
					1.4775	-95.9869	-87.0058	-100.418		1.4775	-86.7025	-78.373	-91.7698
					1.4825	-95.3352	-89.3652	-102.762		1.4825	-89.2793	-77.8417	-91.3879
					1.4875	-97.1674	-88.834	-102.38		1.4875	-85.8228	-74.5706	-86.1019
					1.4925	-94.6724	-85.5627	-97.0941		1.4925	-84.9305	-69.5985	-82.8553
					1.4975	-94.1415	-80.5906	-93.8474		1.4975	-85.1595	-76.9501	-88.564
					1.5025	-94.6168	-87.9422	-99.5565		1.5025	-89.3565	-82.5388	-97.0132
					1.5075	-98.3451	-93.5309	-108.006		1.5075	-87.7412	-79.7666	-92.4718
					1.5125	-96.6331	-90.7588	-103.464		1.5125	-89.4785	-73.0463	-85.3226
					1.5175	-98.0945	-84.0384	-96.3146		1.5175	-90.5598	-75.0976	-90.7695
					1.5225	-98.9848	-86.0897	-101.762		1.5225	-87.306	-76.01	-89.5232
					1.5275	-96.717	-87.0021	-100.515		1.5275	-88.6528	-69.8176	-83.5561
					1.5325	-97.8346	-80.8096	-94.5486		1.5325	-83.8624	-76.2987	-89.8934
					1.5375	-94.2053	-87.2908	-100.885		1.5375	-89.9878	-75.7887	-89.012
					1.5425	-99.5355	-86.7808	-100.005		1.5425	-88.1846	-78.9112	-92.349
					1.5475	-98.11	-89.9033	-103.341		1.5475	-89.9304	-79.8597	-93.4111
					1.5525	-99.5281	-90.8518	-104.403		1.5525	-89.4266	-82.8379	-96.4853
					1.5575	-99.477	-93.8299	-107.477		1.5575	-92.8873	-79.4398	-92.2251
					1.5625	-102.326	-90.4318	-103.217		1.5625	-90.6467	-74.6946	-87.3446
					1.5675	-100.274	-85.6867	-98.3367		1.5675	-92.244	-81.3865	-100.052
					1.5725	-101.854	-92.3788	-111.046		1.5725	-92.8065	-85.7072	-96.7967
					1.5775	-102.268	-96.6992	-107.789		1.5775	-93.3322	-88.1582	-102.679
					1.5825	-102.407	-99.1506	-113.669		1.5825	-93.5054	-79.4934	-94.5234
					1.5875	-102.493	-90.4855	-105.516		1.5875	-90.6101	-82.3225	-97.1327
					1.5925	-100.223	-93.3145	-108.126		1.5925	-91.8523	-85.9543	-101.538
					1.5975	-101.212	-96.9463	-112.532		1.5975	-93.1149	-90.5842	-102.966
					1.6025	-101.971	-101.576	-113.957		1.6025	-93.404	-81.4411	-93.5517
					1.6075	-102.152	-92.4332	-104.544		1.6075	-95.2128	-86.7961	-100.479
					1.6125	-103.519	-97.7884	-111.471		1.6125	-92.8357	-83.5653	-96.9963
					1.6175	-101.663	-94.5574	-107.989		1.6175	-94.069	-83.7235	-102.18
					1.6225	-102.74	-94.7156	-113.172		1.6225	-94.0911	-88.626	-103.151
					1.6275	-102.888	-99.6181	-114.143		1.6275	-94.2368	-89.2946	-104.051
					1.6325	-103.237	-100.287	-115.042		1.6325	-96.3499	-84.8119	-100.762
					1.6375	-104.792	-95.8038	-111.754		1.6375	-96.3418	-83.2724	-96.5696
					1.6425	-105.202	-94.2645	-107.561		1.6425	-94.7545	-94.0945	-107.49
					1.6475	-104.067	-105.087	-118.48		1.6475	-96.0538	-92.9261	-105.714
					1.6525	-105.559	-103.919	-116.708		1.6525	-97.8363	-84.4242	-98.5076
					1.6575	-107.42	-95.4162	-109.499		1.6575	-97.2079	-86.533	-99.9911
					1.6625	-107.201	-97.5249	-110.984		1.6625	-98.6164	-89.8919	-100.849
					1.6675	-109.512	-100.884	-111.84		1.6675	-97.8662	-90.7254	-102.71
					1.6725	-108.773	-101.718	-113.703		1.6725	-97.4535	-87.5845	-100.979
					1.6775	-109.03	-98.5767	-111.973		1.6775	-99.3063	-86.7558	-100.767
					1.6825	-111.229	-97.748	-111.761		1.6825	-96.6808	-94.9344	-107.503
					1.6875	-109.692	-105.927	-118.494		1.6875	-97.8413	-92.6353	-107.235
					1.6925	-112.724	-103.627	-118.225		1.6925	-99.3198	-90.97	-101.186
					1.6975	-114.313	-101.962	-112.179		1.6975	-98.2098	-95.8442	-106.928
					1.7025	-113.614	-106.836	-117.922		1.7025	-99.611	-95.6328	-107.789
					1.7075	-117.292	-106.625	-118.783		1.7075	-100.214	-100.884	-110.182
					1.7125	-119.242	-111.876	-121.172		1.7125	-99.5177	-93.9966	-106.276
					1.7175	-117.618	-104.989	-117.269		1.7175	-98.9051	-88.4024	-101.454
					1.7225	-114.544	-99.3946	-112.446		1.7225	-99.8544	-94.6121	-106.685
					1.7275	-115.483	-105.604	-117.677		1.7275	-99.9059	-85.747	-99.1909
					1.7325	-113.551	-96.7389	-110.181		1.7325	-100.25	-94.5451	-107.89
					1.7375	-113.591	-105.537	-118.881		1.7375	-102.195	-93.8533	-107.914
					1.7425	-112.63	-104.846	-118.905		1.7425	-100.661	-96.5974	-111.518
					1.7475	-112.595	-107.589	-122.514		1.7475	-101.238	-108.802	-117.832
					1.7525	-110.571	-119.793	-128.827		1.7525	-102.205	-89.2246	-103.891
					1.7575	-110.356	-100.217	-114.883		1.7575	-98.4702	-83.6349	-98.678
					1.7625	-106.275	-94.6268	-109.671		1.7625	-96.3029	-94.1189	-112.542
					1.7675	-104.794	-105.111	-123.521		1.7675	-104.234	-93.1435	-103.925
					1.7725	-108.049	-104.136	-114.918		1.7725	-106.01	-86.5318	-105.269
					1.7775	-108.876	-97.5239	-116.261		1.7775	-100.802	-93.9242	-104.491
					1.7825	-108.295	-104.916	-115.484		1.7825	-105.066	-87.3592	-100.783
					1.7875	-107.954	-98.3513	-111.776		1.7875	-107.25	-96.6308	-114.939
					1.7925	-107.434	-107.623	-125.929		1.7925	-108.25	-94.9495	-107.116
					1.7975	-107.224	-105.941	-118.107		1.7975	-106.649	-95.6638	-107.683
					1.8025	-105.789	-106.656	-118.673		1.8025	-108.469	-99.4347	-110.575
					1.8075	-106.496	-110.427	-121.563		1.8075	-114.484	-105.072	-116.513
					1.8125	-106.073	-116.065	-127.489		1.8125	-119.795	-91.6462	-104.513
					1.8175	-106.036	-102.638	-115.505		1.8175	-118.286	-92.4504	-106.257
					1.8225	-106.041	-103.443	-117.251		1.8225	-110.596	-102.457	-118.209
					1.8275	-105.44	-113.449	-129.2		1.8275	-111.312	-95.5566	-108.887
					1.8325	-105.952	-106.548	-119.879		1.8325	-108.688	-100.677	-113.718
					1.8375	-106.279	-111.67	-124.712		1.8375	-109.196	-102.165	-114.762
					1.8425	-106.209	-113.156	-125.761		1.8425	-107.451	-89.9655	-104.79
					1.8475	-106.142	-100.958	-115.782		1.8475	-105.701	-103.09	-116.606
					1.8525	-106.455	-114.082	-127.597		1.8525	-105.039	-107.174	-120.001
					1.8575	-106.623	-118.167	-131.008		1.8575	-103.951	-108.702	-113.535
					1.8625	-106.799	-119.704	-124.525		1.8625	-102.39	-86.7297	-100.529
					1.8675	-106.81	-97.7219	-111.522		1.8675	-97.0982	-95.9428	-120.561
					1.8725	-104.705	-106.934	-131.568		1.8725	-99.991	-99.0009	-112.892
					1.8775	-107.806	-109.994	-123.879		1.8775	-101.431	-100.857	-114.584
					1.8825	-107.991	-111.85	-125.57		1.8825	-100.617	-95.8456	-108.929
					1.8875	-108.505	-106.838	-119.921		1.8875	-100.47	-107.631	-121.812
					1.8925	-108.532	-118.623	-132.81		1.8925	-100.41	-98.5018	-111.081
					1.8975	-108.573	-109.495	-122.074		1.8975	-100.257	-105.613	-122.611
					1.9025	-108.811	-116.605	-133.604		1.9025	-99.8036	-121.408	-141.194
					1.9075	-109.013	-132.412	-152.173		1.9075	-99.7036	-108.653	-119.284
					1.9125	-109.087	-119.645	-130.283		1.9125	-99.5564	-121.935	-136.477
					1.9175	-109.088	-132.922	-147.569		1.9175	-99.7086	-122.145	-137.06
					1.9225	-108.801	-133.143	-148.064		1.9225	-99.1201	-98.11	-111.71
					1.9275	-109.065	-109.103	-122.701		1.9275	-99.6835	-97.3368	-113.868
					1.9325	-108.316	-108.33	-124.862		1.9325	-98.437	-93.9715	-109.133
					1.9375	-108.229	-104.964	-120.123		1.9375	-97.8626	-104.254	-123.207
					1.9425	-107.122	-115.247	-134.193		1.9425	-99.3375	-102.56	-114.999
					1.9475	-107.686	-113.554	-125.993		1.9475	-99.7167	-108.893	-125.796
					1.9525	-107.253	-119.884	-136.815		1.9525	-99.9603	-127.611	-141.872
					1.9575	-106.775	-138.6	-152.693		1.9575	-99.8628	-100.55	-112.516
					1.9625	-106.653	-111.543	-123.503		1.9625	-99.8038	-104.113	-125.694
					1.9675	-106.399	-115.107	-136.677		1.9675	-99.9625	-94.8509	-107.868
					1.9725	-106.007	-105.843	-118.866		1.9725	-99.823	-116.324	-131.906
					1.9775	-105.833	-127.315	-142.926		1.9775	-100.028	-121.925	-133.465
					1.9825	-105.483	-132.919	-144.42		1.9825	-100.228	-112.691	-126.075
					1.9875	-105.142	-123.682	-137.05		1.9875	-100.216	-126.661	-139.264
					1.9925	-104.97	-137.65	-150.046		1.9925	-100.338	-120.021	-130.817
					1.9975	-104.666	-131.01	-141.779		1.9975	-100.454	-107.004	-119.808
					2.0025	-104.449	-117.995	-130.814		2.0025	-100.471	-119.059	-134.501
					2.0075	-104.223	-130.044	-145.429		2.0075	-100.541	-106.25	-121.404
					2.0125	-104.024	-117.243	-132.399		2.0125	-100.728	-115.941	-141.312
					2.0175	-103.78	-126.932	-152.188		2.0175	-100.239	-103.583	-116.421
					2.0225	-103.831	-114.575	-127.408		2.0225	-100.305	-124.455	-139.14
					2.0275	-103.599	-135.45	-150.011		2.0275	-100.292	-134.767	-148.096
					2.0325	-103.473	-145.73	-158.835		2.0325	-100.15	-129.404	-139.739
					2.0375	-103.341	-140.408	-150.696		2.0375	-99.9569	-116.186	-129.02
					2.0425	-103.29	-127.18	-140.039		2.0425	-99.7517	-138.088	-152.3
					2.0475	-103.191	-149.058	-160.112		2.0475	-99.544	-116.936	-129.942
					2.0525	-103.154	-127.932	-140.932		2.0525	-99.2795	-120.625	-133.885
					2.0575	-103.09	-131.62	-144.792		2.0575	-99.1302	-129.618	-143.703
					2.0625	-103.037	-140.628	-154.721		2.0625	-98.8864	-104.322	-116.915
					2.0675	-102.972	-115.314	-127.898		2.0675	-98.6671	-115.559	-146.442
					2.0725	-102.956	-126.551	-157.142		2.0725	-98.3608	-116.919	-130.173
					2.0775	-102.93	-127.912	-141.187		2.0775	-98.1307	-129.619	-151.939
					2.0825	-102.93	-140.613	-161.415		2.0825	-97.9295	-148.98	-158.602
					2.0875	-102.868	-160.579	-166.972		2.0875	-97.7413	-131.525	-144.646
					2.0925	-102.854	-142.524	-155.208		2.0925	-97.5244	-126.096	-139.086
					2.0975	-102.798	-137.092	-149.982		2.0975	-97.3202	-117.782	-130.641
					2.1025	-102.799	-128.772	-141.587		2.1025	-97.1351	-140.622	-158.942
					2.1075	-102.735	-151.516	-167.41		2.1075	-97.0129	-132.422	-145.392
					2.1125	-102.693	-143.426	-156.236		2.1125	-96.8259	-113.498	-126.342
					2.1175	-102.627	-124.488	-137.35		2.1175	-96.6946	-115.459	-128.293
					2.1225	-102.59	-126.449	-139.259		2.1225	-96.5462	-143.032	-159.241
					2.1275	-102.499	-154.164	-167.424		2.1275	-96.4334	-153.063	-158.909
					2.1325	-102.45	-165.808	-165.41		2.1325	-96.3058	-150.688	-158.029
					2.1375	-102.344	-162.244	-163.557		2.1375	-96.2228	-117.344	-129.615
					2.1425	-102.273	-128.334	-140.587		2.1425	-96.0844	-115.574	-128.896
					2.1475	-102.169	-126.568	-139.873		2.1475	-96.0378	-142.537	-157.925
					2.1525	-102.074	-153.499	-167.022		2.1525	-95.9254	-150.973	-159.287
					2.1575	-101.952	-163.014	-166.872		2.1575	-95.877	-154.397	-159.262
					2.1625	-101.853	-168.74	-166.159		2.1625	-95.788	-129.456	-142.116
					2.1675	-101.716	-140.455	-153.011		2.1675	-95.7416	-134.177	-146.742
					2.1725	-101.615	-145.219	-157.288		2.1725	-95.6609	-125.52	-138.291
					2.1775	-101.471	-136.516	-149.362		2.1775	-95.6252	-145.627	-157.024
					2.1825	-101.363	-156.958	-166.74		2.1825	-95.5459	-119.822	-132.645
					2.1875	-101.218	-130.812	-143.604		2.1875	-95.4884	-136.531	-159.795
					2.1925	-101.122	-147.529	-167.884		2.1925	-95.4845	-143.81	-157.928
					2.1975	-100.938	-155.104	-166.296		2.1975	-95.4075	-122.447	-135.091
					2.2025	-100.855	-133.441	-146.068		2.2025	-95.3231	-134.446	-152.351
					2.2075	-100.714	-145.457	-162.192		2.2075	-95.2875	-150.806	-155.33
					2.2125	-100.61	-163.198	-157.389		2.2125	-95.2051	-154.012	-156.798
					2.2175	-100.47	-168.686	-164.517		2.2175	-95.1584	-153.617	-157.46
					2.2225	-100.374	-168.695	-165.95		2.2225	-95.0717	-154.493	-158.856
					2.2275	-100.239	-170.322	-167.053		2.2275	-95.0189	-139.547	-142.957
					2.2325	-100.148	-150.335	-149.939		2.2325	-94.9202	-124.248	-137.772
					2.2375	-100.021	-135.26	-148.369		2.2375	-94.8547	-115.792	-128.606
					2.2425	-99.9381	-126.778	-139.65		2.2425	-94.7538	-141.731	-154.011
					2.2475	-99.8145	-153.083	-163.443		2.2475	-94.6813	-151.797	-154.848
					2.2525	-99.7369	-164.936	-165.113		2.2525	-94.565	-153.179	-154.921
					2.2575	-99.6233	-168.274	-164.668		2.2575	-94.4817	-153.694	-155.722
					2.2625	-99.553	-169.012	-165.398		2.2625	-94.3571	-153.455	-157.106
					2.2675	-99.445	-169.085	-165.192		2.2675	-94.2691	-152.939	-156.161
					2.2725	-99.3788	-169.153	-165.617		2.2725	-94.1391	-152.99	-156.498
					2.2775	-99.275	-167.825	-164.829		2.2775	-94.0445	-152.205	-156.827
					2.2825	-99.2135	-167.308	-166.12		2.2825	-93.9103	-152.679	-157.081
					2.2875	-99.1137	-168.439	-165.358		2.2875	-93.8129	-152.879	-156.691
					2.2925	-99.055	-167.681	-163.113		2.2925	-93.6769	-152.358	-157.241
					2.2975	-98.9575	-168.346	-166.931		2.2975	-93.5783	-142.789	-154.233
					2.3025	-98.9009	-154.11	-163.794		2.3025	-93.4438	-151.363	-157.292
					2.3075	-98.8035	-166.3	-165.95		2.3075	-93.3463	-129.044	-142.918
					2.3125	-98.7467	-140.039	-153.981		2.3125	-93.1818	-145.394	-157.223
					2.3175	-98.6662	-157.211	-162.547		2.3175	-93.092	-150.685	-155.269
					2.3225	-98.608	-164.274	-161.056		2.3225	-93.5649	-142.741	-154.838
					2.3275	-99.1761	-153.928	-163.772		2.3275	-5.49605	-5.49605	-5.49605

## Sheet: IR6
Measured					Old					New
Bands	63	1000	16000		Bands	63	1000	16000		Bands	63	1000	16000
RT60	2.45008	1.41866	1.06476		RT60	1.41934	1.67454	0.828935		RT60	1.33844	1.67615	0.828935
EDT	0	0	0		EDT	0	0	0		EDT	0	0	0
DRR	-47.1879	-6.90544	-7.21032		DRR	-17.9512	5.83268	7.08428		DRR	-25.3342	-4.5941	-3.90757
C50	4.69572	4.04553	2.56574		C50	6.0186	14.3622	18.6042		C50	3.90431	7.73063	12.0204
C80	7.49102	6.24015	5.89434		C80	8.48547	16.0298	21.4871		C80	6.44118	9.57115	15.0039
D50	74.6727	71.7383	64.3545		D50	79.9926	96.4668	98.6397		D50	71.0744	85.5702	94.0911
TS	0.043288	0.047852	0.052361		TS	0.038849	0.007669	0.003053		TS	0.05669	0.029688	0.01282
Bands	63	1000	16000		Bands	63	1000	16000		Bands	63	1000	16000
0.0025	-29.0614	4.79075	-3.49456		0.0025	-31.5521	-6.68655	-0.331764		0.0025	-19.918	-6.12699	0.856865
0.0075	-2.12326	5.06123	-6.1561		0.0075	-19.3739	-16.1192	-10.1352		0.0075	-15.4917	-9.43311	-3.79923
0.0125	1.16612	3.33423	-7.46691		0.0125	-28.4469	-20.065	-14.7914		0.0125	-15.793	-13.6871	-9.03646
0.0175	2.06829	-2.4255	-10.4516		0.0175	-27.3096	-24.6031	-20.0286		0.0175	-13.9185	-16.7575	-10.3066
0.0225	-8.24432	-3.56648	-7.25955		0.0225	-25.2606	-27.7413	-21.2987		0.0225	-18.2047	-17.402	-11.8372
0.0275	-7.44334	-3.9216	-8.6041		0.0275	-28.6038	-28.3916	-22.8293		0.0275	-22.3712	-19.1817	-12.8958
0.0325	-18.7722	-4.15454	-9.31127		0.0325	-33.1875	-30.175	-23.8879		0.0325	-20.6776	-19.4132	-13.4198
0.0375	-13.6267	-3.68129	-8.66445		0.0375	-31.1771	-30.4047	-24.4119		0.0375	-19.9045	-18.8839	-14.7393
0.0425	-7.95201	-5.41115	-11.7026		0.0425	-30.487	-29.876	-25.7314		0.0425	-21.1478	-18.0132	-15.951
0.0475	-8.24186	-5.37626	-10.8369		0.0475	-31.2395	-29.0053	-26.9431		0.0475	-25.0124	-24.5483	-16.551
0.0525	-9.30799	-5.43917	-10.6614		0.0525	-34.9416	-35.5404	-27.5431		0.0525	-25.455	-23.4883	-17.3168
0.0575	-10.8313	-7.27764	-12.9975		0.0575	-35.5559	-34.4804	-28.3089		0.0575	-21.8906	-20.8666	-18.3243
0.0625	-9.59061	-7.69688	-11.1418		0.0625	-32.2433	-31.8587	-29.3164		0.0625	-25.6167	-20.7953	-17.6816
0.0675	-6.62319	-6.40821	-11.5482		0.0675	-35.6368	-31.7874	-28.6737		0.0675	-24.5427	-21.8571	-18.6133
0.0725	-16.2812	-4.51629	-13.397		0.0725	-34.765	-32.8493	-29.6054		0.0725	-24.3003	-22.4887	-19.3996
0.0775	-15.2856	-6.70462	-11.5388		0.0775	-34.4674	-33.4809	-30.3917		0.0775	-25.2767	-24.2353	-19.591
0.0825	-10.636	-6.80483	-12.4649		0.0825	-35.3573	-35.2274	-30.5831		0.0825	-28.3131	-22.8555	-19.6455
0.0875	-13.1121	-6.10149	-14.5476		0.0875	-38.1117	-33.8476	-30.6376		0.0875	-30.4273	-25.1644	-22.2034
0.0925	-16.1287	-7.37742	-15.7762		0.0925	-40.3395	-36.1564	-33.1955		0.0925	-27.1597	-25.8597	-21.7134
0.0975	-20.4467	-10.0662	-15.2218		0.0975	-37.3901	-36.8518	-32.7055		0.0975	-27.8132	-24.8999	-21.947
0.1025	-21.3013	-8.9587	-14.0932		0.1025	-38.1872	-35.8919	-32.9391		0.1025	-28.5174	-24.4863	-22.5996
0.1075	-12.0557	-10.5628	-13.9669		0.1075	-38.7175	-35.4783	-33.5917		0.1075	-29.0611	-27.1301	-23.1446
0.1125	-14.7341	-10.8161	-18.1073		0.1125	-39.4035	-38.1222	-34.1367		0.1125	-31.2639	-26.4976	-23.1876
0.1175	-15.2042	-9.22087	-17.5989		0.1175	-41.5812	-37.4897	-34.1797		0.1175	-28.9473	-24.3209	-23.9614
0.1225	-16.0096	-10.832	-16.359		0.1225	-39.5638	-35.313	-34.9535		0.1225	-28.277	-25.448	-24.1701
0.1275	-10.193	-10.3199	-16.8406		0.1275	-38.8527	-36.4401	-35.1622		0.1275	-29.7735	-26.012	-24.758
0.1325	-14.7267	-10.7992	-16.4186		0.1325	-40.4016	-37.0041	-35.7501		0.1325	-29.1515	-27.4615	-24.6212
0.1375	-14.1661	-10.9615	-18.276		0.1375	-39.8558	-38.4535	-35.6133		0.1375	-29.5018	-28.0188	-26.1293
0.1425	-14.8952	-11.0472	-18.8818		0.1425	-40.1261	-39.0109	-37.1214		0.1425	-29.8107	-27.1599	-26.7917
0.1475	-18.7292	-10.2391	-18.3771		0.1475	-40.5988	-38.152	-37.7838		0.1475	-29.5936	-28.3511	-26.6052
0.1525	-23.8585	-11.8286	-17.4278		0.1525	-40.298	-39.3432	-37.5973		0.1525	-30.1051	-27.4945	-26.3164
0.1575	-18.0092	-10.9125	-18.9523		0.1575	-40.8299	-38.4865	-37.3085		0.1575	-32.0729	-26.7051	-25.7789
0.1625	-19.3406	-13.4597	-19.5178		0.1625	-42.7461	-37.6972	-36.771		0.1625	-32.7651	-27.2822	-27.2734
0.1675	-21.0001	-11.4959	-19.8213		0.1675	-43.4419	-38.2743	-38.2655		0.1675	-32.2914	-28.0717	-27.9598
0.1725	-22.9487	-13.046	-21.6868		0.1725	-43.2703	-39.0638	-38.9519		0.1725	-32.3968	-28.3448	-28.7871
0.1775	-22.279	-13.351	-17.9153		0.1775	-43.486	-39.3369	-39.7792		0.1775	-29.4301	-26.7446	-28.299
0.1825	-21.9009	-11.5145	-19.2292		0.1825	-40.3808	-37.7367	-39.2911		0.1825	-30.7646	-29.5987	-29.3262
0.1875	-25.5874	-13.0934	-21.0132		0.1875	-41.5498	-40.5908	-40.3183		0.1875	-31.8542	-28.7924	-29.6213
0.1925	-21.729	-11.5248	-21.0625		0.1925	-42.6136	-39.7845	-40.6134		0.1925	-31.0027	-29.7773	-30.1991
0.1975	-13.8414	-15.2296	-22.812		0.1975	-41.7071	-40.7694	-41.1912		0.1975	-34.3915	-29.3968	-30.8188
0.2025	-10.9454	-14.5696	-22.9115		0.2025	-44.7339	-40.3889	-41.8109		0.2025	-34.5157	-28.7571	-29.917
0.2075	-18.321	-14.2343	-22.4776		0.2075	-45.2245	-39.7492	-40.9091		0.2075	-34.4664	-29.1518	-30.7653
0.2125	-31.0929	-13.4255	-22.9364		0.2125	-45.1047	-40.1439	-41.7574		0.2125	-34.7605	-29.8255	-31.9182
0.2175	-24.955	-13.6434	-20.673		0.2175	-45.7508	-40.8177	-42.9103		0.2175	-32.677	-29.8996	-31.4206
0.2225	-20.549	-13.1201	-23.1822		0.2225	-43.3961	-40.8917	-42.4127		0.2225	-32.2984	-31.2451	-31.4669
0.2275	-26.4607	-16.2945	-23.8891		0.2275	-43.1582	-42.2372	-42.459		0.2275	-33.5346	-30.0433	-31.5698
0.2325	-29.1253	-13.7806	-23.7357		0.2325	-44.1365	-41.0354	-42.5619		0.2325	-33.5603	-31.3347	-32.5109
0.2375	-25.8024	-15.9388	-24.9341		0.2375	-44.1711	-42.3268	-43.503		0.2375	-32.1512	-30.4341	-33.1178
0.2425	-26.9129	-15.2734	-22.6839		0.2425	-42.9268	-41.4262	-44.1099		0.2425	-32.804	-32.1781	-33.302
0.2475	-28.2519	-13.3314	-25.1541		0.2475	-43.3876	-43.1702	-44.2941		0.2475	-34.3206	-30.8852	-33.3722
0.2525	-23.4152	-16.4282	-23.3971		0.2525	-44.7382	-41.8772	-44.3643		0.2525	-35.3731	-31.5837	-33.1299
0.2575	-18.2344	-18.6435	-24.7589		0.2575	-45.9874	-42.5758	-44.122		0.2575	-31.4579	-31.5326	-34.511
0.2625	-21.9155	-15.7003	-25.2324		0.2625	-42.1412	-42.5247	-45.5031		0.2625	-34.94	-31.0212	-34.9113
0.2675	-27.3069	-20.0886	-24.4172		0.2675	-45.3963	-42.0133	-45.9034		0.2675	-34.0496	-31.1193	-35.4506
0.2725	-29.0134	-17.7664	-24.9696		0.2725	-44.6621	-42.1114	-46.4427		0.2725	-33.6661	-31.8485	-34.9239
0.2775	-28.1221	-15.413	-25.0029		0.2775	-44.2268	-42.8406	-45.916		0.2775	-32.6596	-33.4631	-36.1346
0.2825	-28.1467	-17.5715	-25.4181		0.2825	-43.2989	-44.4552	-47.1267		0.2825	-35.8297	-31.7408	-36.5547
0.2875	-23.4181	-15.6197	-24.941		0.2875	-46.296	-42.7329	-47.5468		0.2875	-36.4657	-34.6532	-36.1613
0.2925	-23.9819	-17.9646	-26.2438		0.2925	-46.9351	-45.6453	-47.1534		0.2925	-36.7883	-31.3786	-36.7171
0.2975	-31.9877	-19.3788	-26.9078		0.2975	-47.3245	-42.3707	-47.7092		0.2975	-35.4222	-32.4783	-37.8317
0.3025	-27.0869	-19.6119	-28.3723		0.3025	-46.0882	-43.4704	-48.8238		0.3025	-35.34	-32.2262	-38.1743
0.3075	-23.5645	-19.6847	-27.915		0.3075	-45.9768	-43.2183	-49.1664		0.3075	-36.1885	-34.4378	-38.1991
0.3125	-21.8857	-19.2993	-28.152		0.3125	-46.8583	-45.4299	-49.1912		0.3125	-36.631	-34.046	-37.5841
0.3175	-24.6189	-21.0929	-29.7188		0.3175	-47.2939	-45.0381	-48.5762		0.3175	-36.0881	-34.484	-38.5589
0.3225	-30.6906	-20.171	-26.6334		0.3225	-46.793	-45.476	-49.551		0.3225	-35.1786	-35.3543	-38.5705
0.3275	-36.1529	-18.7734	-28.979		0.3275	-45.9644	-46.3464	-49.5626		0.3275	-35.9135	-33.6216	-39.1904
0.3325	-27.5339	-17.8844	-30.1139		0.3325	-46.7016	-44.6137	-50.1825		0.3325	-35.9817	-34.5227	-40.4779
0.3375	-25.3195	-18.1965	-28.9798		0.3375	-46.7479	-45.5148	-51.47		0.3375	-38.4271	-34.6361	-39.5769
0.3425	-27.5195	-19.0095	-29.0673		0.3425	-49.1742	-45.6282	-50.569		0.3425	-37.3041	-35.2649	-39.9634
0.3475	-35.7273	-21.0247	-30.2628		0.3475	-48.0822	-46.2569	-50.9555		0.3475	-39.5568	-36.2567	-41.0338
0.3525	-29.5484	-21.0013	-30.6753		0.3525	-50.2765	-47.2488	-52.0259		0.3525	-37.7434	-32.8351	-40.2807
0.3575	-27.6394	-20.3339	-31.4487		0.3575	-48.5556	-43.8272	-51.2728		0.3575	-38.3923	-34.815	-42.0444
0.3625	-26.1439	-20.2746	-31.2091		0.3625	-49.208	-45.8071	-53.0365		0.3625	-37.3309	-35.9809	-41.8778
0.3675	-22.6205	-17.6266	-31.6869		0.3675	-48.1922	-46.973	-52.8699		0.3675	-40.3926	-36.0099	-41.9099
0.3725	-29.4963	-21.7717	-33.0858		0.3725	-51.2781	-47.002	-52.902		0.3725	-37.0562	-35.7698	-42.3967
0.3775	-36.3861	-21.9005	-31.937		0.3775	-47.9257	-46.7619	-53.3888		0.3775	-40.7552	-34.8883	-43.6849
0.3825	-32.9629	-22.4004	-32.3745		0.3825	-51.6234	-45.8804	-54.677		0.3825	-40.4287	-35.8041	-42.3593
0.3875	-28.6564	-21.6306	-31.1442		0.3875	-51.358	-46.7962	-53.3514		0.3875	-38.8485	-37.1437	-43.9784
0.3925	-26.578	-21.5989	-30.7751		0.3925	-49.7858	-48.1358	-54.9705		0.3925	-38.7624	-38.0402	-42.695
0.3975	-30.2329	-21.4712	-32.3531		0.3975	-49.682	-49.0323	-53.6871		0.3975	-39.523	-35.6566	-43.6489
0.4025	-27.0636	-25.0159	-35.0577		0.4025	-50.3637	-46.6487	-54.641		0.4025	-37.5417	-36.0396	-43.9619
0.4075	-32.5251	-22.2607	-31.7141		0.4075	-48.431	-47.0317	-54.954		0.4075	-39.6104	-37.7127	-45.7152
0.4125	-31.4804	-23.5729	-31.901		0.4125	-50.4116	-48.7048	-56.7073		0.4125	-40.7189	-36.7307	-44.121
0.4175	-29.0888	-23.5017	-31.3045		0.4175	-51.3795	-47.7228	-55.1131		0.4175	-40.7876	-37.9865	-46.3972
0.4225	-28.6863	-23.6111	-32.7183		0.4225	-51.6579	-48.9786	-57.3893		0.4225	-40.4569	-38.7169	-45.5269
0.4275	-27.4516	-23.6042	-34.4476		0.4275	-51.18	-49.709	-56.519		0.4275	-41.0828	-37.2033	-45.8317
0.4325	-31.0715	-24.2934	-35.9324		0.4325	-51.7217	-48.1954	-56.8238		0.4325	-42.8372	-37.5518	-46.4275
0.4375	-41.4334	-24.5435	-35.1213		0.4375	-53.4877	-48.5439	-57.4196		0.4375	-39.9919	-36.7152	-44.876
0.4425	-34.3981	-24.1396	-33.2279		0.4425	-50.7764	-47.7073	-55.8681		0.4425	-40.5612	-39.6926	-47.9308
0.4475	-34.2139	-25.5777	-35.5535		0.4475	-51.1603	-50.6847	-58.9229		0.4475	-42.8102	-37.5646	-47.4586
0.4525	-35.7547	-26.1479	-39.6364		0.4525	-53.4231	-48.5567	-58.4507		0.4525	-42.2195	-40.2714	-47.4139
0.4575	-39.8574	-22.7652	-35.358		0.4575	-52.8404	-51.2635	-58.406		0.4575	-43.0548	-37.8095	-46.8097
0.4625	-34.551	-24.3847	-34.9407		0.4625	-53.544	-48.8016	-57.8018		0.4625	-41.5324	-38.061	-47.7026
0.4675	-34.2652	-22.7687	-36.7441		0.4675	-52.1864	-49.0531	-58.6947		0.4675	-44.1156	-41.3404	-48.5065
0.4725	-35.1432	-23.7769	-37.7836		0.4725	-54.557	-52.3325	-59.4986		0.4725	-44.0443	-39.726	-48.9711
0.4775	-29.8648	-24.0517	-36.1427		0.4775	-54.6565	-50.7181	-59.9632		0.4775	-43.0952	-38.0812	-47.3759
0.4825	-28.1321	-22.8765	-34.8958		0.4825	-53.6227	-49.0733	-58.368		0.4825	-42.8814	-38.5069	-49.2097
0.4875	-28.682	-26.9246	-39.4938		0.4875	-53.3999	-49.499	-60.2018		0.4875	-42.5392	-40.9301	-47.7835
0.4925	-45.4954	-27.2784	-38.3841		0.4925	-53.0543	-51.9222	-58.7756		0.4925	-46.691	-40.1949	-50.4737
0.4975	-42.2961	-27.639	-37.8653		0.4975	-57.0052	-51.187	-61.4658		0.4975	-43.4431	-39.5025	-48.8044
0.5025	-34.1521	-26.1438	-37.493		0.5025	-53.9571	-50.4946	-59.7965		0.5025	-43.9748	-38.862	-50.9945
0.5075	-32.2397	-29.4179	-37.7347		0.5075	-54.5095	-49.8541	-61.9866		0.5075	-43.7747	-40.8718	-51.3986
0.5125	-34.3145	-26.9594	-36.6151		0.5125	-54.3814	-51.8639	-62.3907		0.5125	-48.1438	-39.9957	-49.6014
0.5175	-33.1269	-29.2013	-37.4066		0.5175	-58.5053	-50.9878	-60.5935		0.5175	-45.5899	-40.5038	-50.6364
0.5225	-31.4448	-29.0589	-39.4532		0.5225	-56.1849	-51.4959	-61.6285		0.5225	-44.633	-38.2906	-49.968
0.5275	-32.7621	-29.0408	-40.653		0.5275	-55.2473	-49.2826	-60.9601		0.5275	-47.6121	-40.8734	-49.6881
0.5325	-36.1683	-28.5192	-39.9066		0.5325	-58.0925	-51.8655	-60.6803		0.5325	-44.3713	-40.6087	-51.5348
0.5375	-33.8301	-28.1978	-39.1202		0.5375	-55.0376	-51.6008	-62.5269		0.5375	-47.6748	-42.3855	-52.0268
0.5425	-38.6756	-26.921	-41.6332		0.5425	-58.2846	-53.3776	-63.0189		0.5425	-45.1843	-39.9131	-52.1481
0.5475	-39.4276	-27.7024	-41.4244		0.5475	-55.9071	-50.9052	-63.1402		0.5475	-46.4593	-42.9269	-53.3858
0.5525	-29.9816	-29.1148	-41.042		0.5525	-57.13	-53.919	-64.3779		0.5525	-49.3081	-42.0407	-53.115
0.5575	-36.7339	-27.7674	-40.5973		0.5575	-59.9255	-53.0328	-64.1071		0.5575	-48.0399	-42.3937	-52.6564
0.5625	-39.4646	-29.421	-39.855		0.5625	-58.8086	-53.3858	-63.6485		0.5625	-48.3585	-41.709	-53.4117
0.5675	-42.6993	-30.7533	-40.4012		0.5675	-59.1512	-52.7011	-64.4038		0.5675	-49.5323	-42.009	-52.3471
0.5725	-32.8917	-30.3942	-41.6659		0.5725	-60.3402	-53.0011	-63.3392		0.5725	-47.6531	-42.427	-54.6404
0.5775	-36.7583	-30.6707	-42.4926		0.5775	-58.5401	-53.4191	-65.6325		0.5775	-48.7115	-46.1243	-54.4449
0.5825	-37.5086	-31.1836	-40.2351		0.5825	-59.5692	-57.1165	-65.437		0.5825	-50.3935	-44.1643	-56.4842
0.5875	-37.3274	-31.0816	-42.634		0.5875	-61.3022	-55.1564	-67.4763		0.5875	-47.6592	-41.9543	-54.495
0.5925	-38.0039	-30.3589	-41.0883		0.5925	-58.6246	-52.9464	-65.4871		0.5925	-51.3818	-44.6972	-53.7533
0.5975	-34.7033	-28.9956	-41.3763		0.5975	-62.3592	-55.6893	-64.7454		0.5975	-47.823	-41.3162	-55.8623
0.6025	-38.1461	-31.5595	-40.4048		0.6025	-58.7939	-52.3083	-66.8544		0.6025	-48.7701	-45.1954	-56.0194
0.6075	-38.7336	-33.5438	-44.25		0.6075	-59.7283	-56.1875	-67.0115		0.6075	-51.0208	-45.3042	-56.8832
0.6125	-42.2223	-29.8035	-44.3822		0.6125	-62.0201	-56.2963	-67.8753		0.6125	-48.4269	-44.9122	-56.6371
0.6175	-36.7388	-29.181	-43.8555		0.6175	-59.3778	-55.9043	-67.6292		0.6175	-50.0005	-46.9053	-55.5079
0.6225	-38.9837	-31.0277	-42.6419		0.6225	-60.9396	-57.8974	-66.5		0.6225	-51.5584	-43.6829	-57.9177
0.6275	-38.8771	-33.0862	-45.3587		0.6275	-62.5781	-54.6749	-68.9098		0.6275	-48.9502	-44.8196	-55.4808
0.6325	-38.3395	-31.2602	-43.6061		0.6325	-59.9672	-55.8117	-66.4729		0.6325	-47.3804	-42.9521	-55.3894
0.6375	-35.214	-34.2542	-45.098		0.6375	-58.2777	-53.9442	-66.3815		0.6375	-49.3285	-45.1384	-56.5435
0.6425	-44.3869	-34.1018	-44.3807		0.6425	-60.0693	-56.1305	-67.5356		0.6425	-51.2267	-46.1312	-56.9807
0.6475	-39.0352	-32.8454	-44.0112		0.6475	-61.8747	-57.1233	-67.9728		0.6475	-52.3235	-44.6028	-56.7393
0.6525	-41.0881	-33.8828	-43.2666		0.6525	-62.7618	-55.5949	-67.7314		0.6525	-54.3845	-44.8239	-55.4091
0.6575	-34.6521	-34.5701	-46.6186		0.6575	-65.5809	-55.816	-66.4012		0.6575	-49.741	-43.7478	-56.6356
0.6625	-35.4833	-32.9804	-46.3209		0.6625	-60.6081	-54.7399	-67.6277		0.6625	-50.5332	-45.3959	-57.7272
0.6675	-34.913	-33.9105	-45.5822		0.6675	-61.1864	-56.388	-68.7193		0.6675	-52.5001	-44.9404	-58.2478
0.6725	-40.7792	-34.0882	-45.5128		0.6725	-63.0378	-55.9325	-69.2399		0.6725	-51.372	-45.3697	-57.1589
0.6775	-39.8436	-32.6161	-45.7268		0.6775	-61.8124	-56.3618	-68.151		0.6775	-55.1211	-44.7241	-57.1724
0.6825	-39.8499	-33.9788	-46.6253		0.6825	-65.3052	-55.7162	-68.1646		0.6825	-55.8094	-45.9122	-60.0743
0.6875	-43.0111	-32.7593	-45.5426		0.6875	-66.3182	-56.9043	-71.0664		0.6875	-54.2478	-47.6457	-57.9739
0.6925	-34.9167	-33.5067	-46.9881		0.6925	-64.8403	-58.6378	-68.966		0.6925	-52.056	-47.465	-59.9833
0.6975	-41.2753	-34.4554	-45.558		0.6975	-62.7214	-58.4571	-70.9754		0.6975	-50.8216	-47.59	-61.8667
0.7025	-36.8873	-33.6259	-47.1818		0.7025	-61.3625	-58.5821	-72.8588		0.7025	-53.6769	-49.999	-61.2441
0.7075	-43.12	-32.6817	-47.0448		0.7075	-63.9166	-60.9911	-72.2362		0.7075	-55.5099	-48.4611	-63.5059
0.7125	-38.5292	-34.3811	-45.9437		0.7125	-65.687	-59.4532	-74.498		0.7125	-55.6608	-47.8251	-58.5305
0.7175	-41.3456	-36.1794	-47.7571		0.7175	-65.9498	-58.8172	-69.5226		0.7175	-53.4282	-46.9274	-61.3904
0.7225	-36.6433	-36.9386	-48.0044		0.7225	-63.8991	-57.9195	-72.3825		0.7225	-54.2422	-48.6098	-61.3556
0.7275	-36.2782	-35.5639	-46.7093		0.7275	-64.7453	-59.602	-72.3477		0.7275	-53.031	-47.0293	-61.5836
0.7325	-39.5946	-36.7816	-48.7568		0.7325	-63.5011	-58.0214	-72.5757		0.7325	-54.1483	-48.0865	-62.8743
0.7375	-36.1929	-39.0701	-48.2646		0.7375	-64.5533	-59.0786	-73.8664		0.7375	-56.8082	-49.4991	-62.8592
0.7425	-38.6308	-36.4204	-47.8324		0.7425	-67.3997	-60.4912	-73.8513		0.7425	-52.2127	-48.582	-65.1853
0.7475	-41.8442	-36.633	-48.9474		0.7475	-62.8604	-59.5741	-76.1774		0.7475	-52.6451	-50.0715	-62.8448
0.7525	-38.9901	-36.776	-48.9889		0.7525	-63.2708	-61.0636	-73.8369		0.7525	-53.512	-47.7481	-63.8017
0.7575	-39.1939	-36.8908	-48.2975		0.7575	-64.147	-58.7402	-74.7938		0.7575	-56.0775	-47.6857	-61.8364
0.7625	-38.653	-35.8782	-49.1945		0.7625	-66.6887	-58.6778	-72.8285		0.7625	-53.7036	-49.0642	-60.651
0.7675	-38.1395	-37.3695	-49.0524		0.7675	-64.4607	-60.0563	-71.6431		0.7675	-55.0879	-47.4404	-62.9076
0.7725	-40.8567	-37.8714	-48.3385		0.7725	-65.8808	-58.4325	-73.8997		0.7725	-54.7786	-49.8301	-61.5827
0.7775	-42.1793	-36.7277	-48.8072		0.7775	-65.6263	-60.8222	-72.5748		0.7775	-56.0842	-49.4936	-64.9231
0.7825	-49.4403	-36.176	-50.0871		0.7825	-66.9375	-60.4856	-75.9152		0.7825	-56.7715	-50.2464	-63.8313
0.7875	-38.1958	-37.2061	-49.2298		0.7875	-67.6709	-61.2385	-74.8234		0.7875	-55.4673	-51.298	-65.5617
0.7925	-41.7864	-39.1903	-49.6424		0.7925	-66.4467	-62.2901	-76.5537		0.7925	-53.501	-50.1429	-64.3482
0.7975	-40.9476	-36.601	-49.388		0.7975	-64.5057	-61.135	-75.3403		0.7975	-59.2367	-49.4084	-65.575
0.8025	-36.376	-38.5938	-48.8604		0.8025	-70.3032	-60.4005	-76.5671		0.8025	-55.7715	-50.8085	-63.3736
0.8075	-39.7368	-38.9608	-50.513		0.8075	-66.8848	-61.8006	-74.3657		0.8075	-57.3569	-50.7288	-62.654
0.8125	-43.247	-41.6293	-48.7916		0.8125	-68.5205	-61.7209	-73.6461		0.8125	-57.6855	-51.2139	-64.8686
0.8175	-41.3667	-39.5178	-49.8915		0.8175	-68.8944	-62.206	-75.8607		0.8175	-57.86	-51.523	-62.4765
0.8225	-37.3491	-37.3794	-49.7216		0.8225	-69.0929	-62.5151	-73.4686		0.8225	-55.6524	-51.6709	-65.2026
0.8275	-41.2134	-35.8086	-50.9977		0.8275	-66.7842	-62.663	-76.1946		0.8275	-60.9828	-51.1082	-66.0071
0.8325	-39.7197	-37.9813	-50.3804		0.8325	-72.1889	-62.1003	-76.9992		0.8325	-57.901	-49.2584	-64.5582
0.8375	-38.6633	-37.9958	-49.4916		0.8375	-69.0758	-60.2505	-75.5504		0.8375	-57.3163	-51.1962	-68.1302
0.8425	-40.5257	-38.6384	-50.4239		0.8425	-68.4809	-62.1883	-79.1223		0.8425	-57.4908	-53.819	-67.6131
0.8475	-48.5952	-38.9358	-50.602		0.8475	-68.6185	-64.8111	-78.6052		0.8475	-57.8611	-51.3372	-65.7231
0.8525	-44.9379	-39.4794	-49.7754		0.8525	-68.8646	-62.3293	-76.7152		0.8525	-61.253	-51.5195	-67.3906
0.8575	-43.9033	-41.6344	-51.3043		0.8575	-72.0514	-62.5116	-78.3827		0.8575	-61.6784	-54.4063	-70.459
0.8625	-41.454	-38.4226	-50.3398		0.8625	-72.3188	-65.3984	-81.4511		0.8625	-59.9258	-53.2052	-66.4657
0.8675	-41.7439	-39.0811	-49.8633		0.8675	-71.3501	-64.1973	-77.4578		0.8675	-57.9058	-51.9763	-66.0594
0.8725	-42.4355	-39.5635	-50.0433		0.8725	-68.728	-62.9684	-77.0515		0.8725	-62.3744	-52.7821	-66.5662
0.8775	-41.8071	-40.5087	-51.1957		0.8775	-72.5798	-63.7742	-77.5583		0.8775	-63.7039	-53.8783	-65.4337
0.8825	-37.7611	-40.0368	-50.2863		0.8825	-74.3499	-64.8703	-76.4258		0.8825	-66.9345	-53.4124	-68.7516
0.8875	-44.0652	-40.6682	-52.1565		0.8875	-76.943	-64.4045	-79.7437		0.8875	-64.2998	-53.2056	-66.3172
0.8925	-44.0134	-39.3434	-50.9929		0.8925	-75.6323	-64.1977	-77.3093		0.8925	-59.5392	-54.1141	-69.4761
0.8975	-39.7787	-40.6205	-50.4041		0.8975	-70.4539	-65.1062	-80.4682		0.8975	-61.7649	-55.1679	-66.0219
0.9025	-36.2456	-40.9649	-50.8778		0.9025	-72.106	-66.16	-77.014		0.9025	-62.1299	-57.2823	-72.297
0.9075	-37.5669	-41.9202	-50.5706		0.9075	-73.0126	-68.2744	-83.2892		0.9075	-61.1217	-57.9978	-67.6147
0.9125	-41.1769	-43.7894	-50.7739		0.9125	-71.5535	-68.9899	-78.6068		0.9125	-62.38	-54.0089	-66.8709
0.9175	-42.3573	-43.3136	-51.2267		0.9175	-72.5924	-65.0011	-77.863		0.9175	-62.9233	-54.9456	-69.4125
0.9225	-41.6583	-43.3351	-51.4489		0.9225	-73.0839	-65.9377	-80.4046		0.9225	-61.6574	-56.1134	-67.6252
0.9275	-42.9091	-42.4148	-50.8073		0.9275	-71.8535	-67.1055	-78.6173		0.9275	-65.046	-55.0184	-69.3481
0.9325	-38.8202	-41.2028	-51.601		0.9325	-75.0161	-66.0105	-80.3402		0.9325	-63.7889	-56.2094	-73.367
0.9375	-35.1254	-38.2081	-51.294		0.9375	-73.8293	-67.2015	-84.359		0.9375	-65.4082	-54.3794	-65.9393
0.9425	-37.0105	-43.2173	-50.8355		0.9425	-75.233	-65.3715	-76.9314		0.9425	-63.4314	-60.1921	-71.1345
0.9475	-40.0726	-42.5998	-50.5128		0.9475	-73.6878	-71.1841	-82.1266		0.9475	-65.7697	-55.8314	-69.3771
0.9525	-41.233	-42.0619	-50.445		0.9525	-75.8005	-66.8235	-80.3691		0.9525	-66.7157	-55.9358	-69.5135
0.9575	-43.4843	-42.7686	-51.6591		0.9575	-76.6177	-66.9279	-80.5056		0.9575	-63.8155	-59.2245	-70.8691
0.9625	-44.7082	-43.2021	-51.522		0.9625	-74.0854	-70.2166	-81.8612		0.9625	-61.2162	-57.5186	-68.4153
0.9675	-36.6936	-42.5122	-51.3315		0.9675	-71.7385	-68.5107	-79.4073		0.9675	-65.0668	-60.7663	-70.1375
0.9725	-38.2563	-44.0785	-51.2068		0.9725	-75.5164	-71.7584	-81.1296		0.9725	-65.7051	-58.371	-71.0925
0.9775	-42.6754	-43.4055	-51.7762		0.9775	-76.1852	-69.3631	-82.0847		0.9775	-67.8352	-59.8011	-71.3445
0.9825	-40.1543	-43.8063	-50.7836		0.9825	-78.4999	-70.7932	-82.3365		0.9825	-67.9939	-57.5609	-71.0174
0.9875	-41.5722	-43.1072	-51.4494		0.9875	-78.54	-68.553	-82.0095		0.9875	-67.6834	-58.6094	-71.0545
0.9925	-39.1659	-42.4872	-51.829		0.9925	-78.1249	-69.6015	-82.0465		0.9925	-66.3988	-59.6829	-72.6213
0.9975	-40.1538	-42.6892	-51.081		0.9975	-77.2817	-70.675	-83.6134		0.9975	-67.8396	-60.0697	-69.4775
1.0025	-45.1948	-41.2044	-51.4063		1.0025	-78.945	-71.0618	-80.4696		1.0025	-70.5085	-57.8298	-73.0013
1.0075	-40.6643	-41.456	-50.6204		1.0075	-81.6892	-68.8219	-83.9934		1.0075	-67.9166	-57.3604	-70.6778
1.0125	-35.7706	-43.2296	-50.4253		1.0125	-79.1661	-68.3525	-81.6699		1.0125	-68.061	-59.59	-74.7391
1.0175	-36.1635	-42.5071	-51.0415		1.0175	-79.5979	-70.5821	-85.7312		1.0175	-69.3285	-61.76	-73.8454
1.0225	-40.7365	-41.847	-51.5382		1.0225	-80.506	-72.7521	-84.8375		1.0225	-68.6853	-60.4232	-75.0739
1.0275	-36.6276	-44.1251	-50.6357		1.0275	-80.3234	-71.4153	-86.0659		1.0275	-69.284	-60.4147	-74.451
1.0325	-43.7364	-44.1483	-51.2694		1.0325	-81.023	-71.4068	-85.4431		1.0325	-71.5591	-62.7585	-75.934
1.0375	-48.9972	-44.8991	-51.8335		1.0375	-83.7471	-73.7506	-86.9262		1.0375	-67.6171	-60.7577	-69.7814
1.0425	-379.298	-379.298	-379.298		1.0425	-79.254	-71.7499	-80.7735		1.0425	-66.9616	-61.1514	-75.5463
1.0475	-379.298	-379.298	-379.298		1.0475	-78.6758	-72.1435	-86.5384		1.0475	-67.6791	-61.7539	-75.2086
1.0525	-379.298	-379.298	-379.298		1.0525	-79.6651	-72.746	-86.2007		1.0525	-68.9757	-63.8663	-77.0338
1.0575	-379.298	-379.298	-379.298		1.0575	-81.0303	-74.8584	-88.0258		1.0575	-68.6569	-58.8714	-72.7684
1.0625	-379.298	-379.298	-379.298		1.0625	-80.8061	-69.8634	-83.7605		1.0625	-68.9246	-61.2433	-75.9952
1.0675	-379.298	-379.298	-379.298		1.0675	-80.9168	-72.2354	-86.9873		1.0675	-69.0598	-63.2185	-74.9784
1.0725	-379.298	-379.298	-379.298		1.0725	-80.7968	-74.2106	-85.9705		1.0725	-72.7067	-65.2794	-77.8165
1.0775	-379.298	-379.298	-379.298		1.0775	-84.6975	-76.2715	-88.8086		1.0775	-70.165	-58.8623	-72.4011
1.0825	-379.298	-379.298	-379.298		1.0825	-82.5672	-69.8544	-83.3932		1.0825	-67.9998	-59.369	-75.7449
1.0875	-379.298	-379.298	-379.298		1.0875	-79.6639	-70.3612	-86.737		1.0875	-69.0922	-63.1688	-79.0095
1.0925	-379.298	-379.298	-379.298		1.0925	-80.592	-74.1609	-90.0016		1.0925	-69.9606	-61.905	-73.8751
1.0975	-379.298	-379.298	-379.298		1.0975	-81.3667	-72.8971	-84.8672		1.0975	-69.1179	-59.8541	-73.9439
1.1025	-379.298	-379.298	-379.298		1.1025	-80.0902	-70.8462	-84.936		1.1025	-70.1245	-62.835	-76.1006
1.1075	-379.298	-379.298	-379.298		1.1075	-80.8145	-73.8271	-87.0927		1.1075	-71.4687	-59.8798	-75.5481
1.1125	-379.298	-379.298	-379.298		1.1125	-81.8648	-70.8719	-86.5403		1.1125	-72.633	-63.9203	-79.4106
1.1175	-379.298	-379.298	-379.298		1.1175	-83.3727	-74.9125	-90.4029		1.1175	-72.2666	-65.9955	-82.6106
1.1225	-379.298	-379.298	-379.298		1.1225	-82.5717	-76.9876	-93.6028		1.1225	-72.3858	-65.6403	-77.4568
1.1275	-379.298	-379.298	-379.298		1.1275	-82.3064	-76.6324	-88.449		1.1275	-75.4466	-57.26	-69.9036
1.1325	-379.298	-379.298	-379.298		1.1325	-84.78	-68.2521	-80.8957		1.1325	-77.702	-60.2006	-73.4658
1.1375	-379.298	-379.298	-379.298		1.1375	-86.5558	-71.1927	-84.458		1.1375	-73.7233	-61.218	-75.6048
1.1425	-379.298	-379.298	-379.298		1.1425	-83.7483	-72.2101	-86.5969		1.1425	-73.6325	-62.8955	-74.7919
1.1475	-379.298	-379.298	-379.298		1.1475	-83.5945	-73.8876	-85.784		1.1475	-75.1375	-64.6475	-79.3573
1.1525	-379.298	-379.298	-379.298		1.1525	-84.9626	-75.6396	-90.3494		1.1525	-74.5888	-66.3986	-78.4445
1.1575	-379.298	-379.298	-379.298		1.1575	-84.0807	-77.3907	-89.4365		1.1575	-74.491	-60.5632	-75.9845
1.1625	-379.298	-379.298	-379.298		1.1625	-84.1473	-71.5553	-86.9766		1.1625	-71.5244	-65.1255	-78.0928
1.1675	-379.298	-379.298	-379.298		1.1675	-81.5008	-76.1176	-89.085		1.1675	-73.4982	-66.2221	-80.063
1.1725	-379.298	-379.298	-379.298		1.1725	-83.3111	-77.2141	-91.0551		1.1725	-76.6843	-63.9283	-77.0788
1.1775	-379.298	-379.298	-379.298		1.1775	-85.8438	-74.9204	-88.071		1.1775	-76.1838	-60.8587	-74.595
1.1825	-379.298	-379.298	-379.298		1.1825	-85.519	-71.8508	-85.5871		1.1825	-76.1803	-64.571	-80.2183
1.1875	-379.298	-379.298	-379.298		1.1875	-85.7165	-75.5631	-91.2104		1.1875	-76.9337	-70.951	-83.3735
1.1925	-379.298	-379.298	-379.298		1.1925	-86.6558	-81.9431	-94.3656		1.1925	-76.5176	-68.7222	-82.0745
1.1975	-379.298	-379.298	-379.298		1.1975	-86.0891	-79.7142	-93.0665		1.1975	-74.8355	-63.339	-80.4577
1.2025	-379.298	-379.298	-379.298		1.2025	-85.0255	-74.3311	-91.4498		1.2025	-79.7899	-67.7778	-82.1684
1.2075	-379.298	-379.298	-379.298		1.2075	-89.904	-78.7699	-93.1604		1.2075	-77.9524	-66.7164	-79.2061
1.2125	-379.298	-379.298	-379.298		1.2125	-87.8408	-77.7085	-90.1981		1.2125	-74.0525	-68.4276	-80.5952
1.2175	-379.298	-379.298	-379.298		1.2175	-84.495	-79.4197	-91.5872		1.2175	-75.5937	-67.1269	-81.4259
1.2225	-379.298	-379.298	-379.298		1.2225	-86.7859	-78.119	-92.4181		1.2225	-79.2238	-65.4994	-78.3161
1.2275	-379.298	-379.298	-379.298		1.2275	-90.4541	-76.4915	-89.3082		1.2275	-80.1935	-68.3222	-77.7007
1.2325	-379.298	-379.298	-379.298		1.2325	-91.1911	-79.3143	-88.6927		1.2325	-77.7427	-62.5116	-78.125
1.2375	-379.298	-379.298	-379.298		1.2375	-88.8194	-73.5037	-89.1171		1.2375	-74.1859	-68.2408	-82.0024
1.2425	-379.298	-379.298	-379.298		1.2425	-85.6509	-79.2329	-92.9945		1.2425	-77.4835	-66.8172	-81.1375
1.2475	-379.298	-379.298	-379.298		1.2475	-89.5583	-77.8093	-92.1295		1.2475	-78.5531	-67.9882	-79.7147
					1.2525	-91.0396	-78.9803	-90.7068		1.2525	-77.8768	-64.3833	-76.6216
					1.2575	-90.3118	-75.3754	-87.6137		1.2575	-77.5921	-67.0521	-81.0015
					1.2625	-89.5148	-78.0442	-91.9936		1.2625	-78.2489	-69.0688	-81.8751
					1.2675	-90.7236	-80.0609	-92.8671		1.2675	-80.7051	-68.5449	-81.5243
					1.2725	-94.0454	-79.537	-92.5163		1.2725	-79.5047	-65.4035	-75.6539
					1.2775	-92.5923	-76.3956	-86.646		1.2775	-77.8206	-69.7762	-84.9361
					1.2825	-90.2189	-80.7683	-95.9281		1.2825	-80.6841	-69.7528	-81.789
					1.2875	-93.7606	-80.7449	-92.7811		1.2875	-79.0868	-72.0222	-85.5205
					1.2925	-91.8279	-83.0143	-96.5126		1.2925	-79.7406	-72.4237	-83.6614
					1.2975	-92.5569	-83.4158	-94.6534		1.2975	-79.8679	-68.5525	-82.5481
					1.3025	-92.2532	-79.5446	-93.5399		1.3025	-81.3988	-67.931	-82.3718
					1.3075	-94.1955	-78.9231	-93.3638		1.3075	-78.1851	-73.1936	-86.4466
					1.3125	-89.633	-84.1858	-97.4388		1.3125	-77.5906	-69.9544	-82.9333
					1.3175	-89.2073	-80.9465	-93.9255		1.3175	-80.7508	-70.7584	-83.1103
					1.3225	-91.961	-81.7505	-94.1023		1.3225	-79.7126	-67.3251	-79.6479
					1.3275	-90.7264	-78.3172	-90.64		1.3275	-79.0035	-71.6009	-86.068
					1.3325	-89.3921	-82.593	-97.0605		1.3325	-82.6727	-73.0239	-85.706
					1.3375	-92.3833	-84.016	-96.698		1.3375	-86.2711	-74.1074	-87.1609
					1.3425	-95.0515	-85.0994	-98.1532		1.3425	-83.5292	-72.5704	-83.4081
					1.3475	-93.4568	-83.5625	-94.4001		1.3475	-84.0066	-69.2495	-83.5738
					1.3525	-94.5053	-80.2417	-94.566		1.3525	-83.0006	-72.2968	-86.5645
					1.3575	-92.3493	-83.2889	-97.5564		1.3575	-84.0009	-71.7541	-86.3583
					1.3625	-93.1932	-82.7462	-97.3505		1.3625	-82.4812	-69.8613	-82.923
					1.3675	-91.7022	-80.8534	-93.9151		1.3675	-87.0068	-72.2307	-89.073
					1.3725	-96.4368	-83.2227	-100.065		1.3725	-84.3326	-73.7657	-87.2782
					1.3775	-93.2411	-84.7578	-98.2704		1.3775	-85.4827	-68.8593	-83.1215
					1.3825	-94.0058	-79.8514	-94.1136		1.3825	-84.3924	-72.9557	-88.9669
					1.3875	-93.988	-83.9478	-99.9591		1.3875	-83.009	-71.8246	-83.4073
					1.3925	-92.4509	-82.8167	-94.3995		1.3925	-85.1365	-73.6543	-87.2792
					1.3975	-93.8551	-84.6464	-98.2711		1.3975	-85.8183	-74.8699	-90.638
					1.4025	-94.6666	-85.8621	-101.63		1.4025	-85.1407	-71.4028	-84.1978
					1.4075	-94.1587	-82.3949	-95.1899		1.4075	-84.4423	-73.7602	-89.6775
					1.4125	-94.1293	-84.7523	-100.67		1.4125	-83.694	-75.5916	-88.0572
					1.4175	-93.2239	-86.5837	-99.0496		1.4175	-86.8443	-77.2186	-88.9863
					1.4225	-96.708	-88.2106	-99.9785		1.4225	-87.0416	-72.405	-85.4081
					1.4275	-97.3132	-83.3971	-96.4003		1.4275	-88.8024	-76.1559	-89.7437
					1.4325	-98.4236	-87.148	-100.735		1.4325	-86.3014	-75.1809	-90.9928
					1.4375	-96.1169	-86.173	-101.985		1.4375	-88.3018	-73.68	-86.2589
					1.4425	-98.781	-84.672	-97.2511		1.4425	-86.599	-70.728	-84.2989
					1.4475	-97.2599	-81.7201	-95.2912		1.4475	-88.626	-76.6494	-91.4077
					1.4525	-99.4063	-87.6416	-102.4		1.4525	-86.5943	-75.0631	-87.8848
					1.4575	-98.319	-86.0553	-98.8769		1.4575	-87.5649	-74.1129	-85.5399
					1.4625	-98.8387	-85.105	-96.5318		1.4625	-87.2475	-76.525	-90.2664
					1.4675	-99.7061	-87.5171	-101.258		1.4675	-90.8576	-77.5895	-93.1524
					1.4725	-102.831	-88.5816	-104.145		1.4725	-89.9264	-75.7609	-89.3787
					1.4775	-102.566	-86.753	-100.37		1.4775	-88.6594	-74.631	-89.7876
					1.4825	-101.122	-85.6232	-100.779		1.4825	-85.0351	-78.9093	-89.0871
					1.4875	-97.1223	-89.9013	-100.08		1.4875	-88.1724	-79.5069	-95.7137
					1.4925	-101.115	-90.4992	-106.706		1.4925	-88.6358	-79.4264	-94.4796
					1.4975	-100.73	-90.4184	-105.469		1.4975	-91.1138	-79.9627	-95.05
					1.5025	-104.688	-90.9548	-106.042		1.5025	-89.6815	-80.8036	-92.5837
					1.5075	-102.374	-91.7956	-103.576		1.5075	-91.3818	-81.8214	-96.6311
					1.5125	-104.509	-92.8135	-107.623		1.5125	-90.4744	-82.1122	-98.05
					1.5175	-103.656	-93.1043	-109.042		1.5175	-90.2965	-77.6869	-92.329
					1.5225	-102.916	-88.6789	-103.321		1.5225	-91.6495	-80.0134	-93.7358
					1.5275	-103.366	-91.0056	-104.727		1.5275	-92.5027	-78.6476	-93.7522
					1.5325	-105.191	-89.6397	-104.744		1.5325	-89.3928	-81.1147	-98.1877
					1.5375	-101.066	-92.1068	-109.181		1.5375	-91.5894	-77.697	-90.7746
					1.5425	-103.823	-88.6891	-101.767		1.5425	-91.6125	-81.4359	-95.1836
					1.5475	-102.755	-92.428	-106.176		1.5475	-92.3329	-79.4526	-92.8793
					1.5525	-103.443	-90.4447	-103.872		1.5525	-93.6776	-83.3453	-96.9165
					1.5575	-104.403	-94.3373	-107.908		1.5575	-93.7658	-84.3491	-96.7065
					1.5625	-104.858	-95.3412	-107.699		1.5625	-92.1417	-81.0866	-95.2786
					1.5675	-103.061	-92.0787	-106.271		1.5675	-93.2837	-81.0253	-92.9355
					1.5725	-103.928	-92.0174	-103.928		1.5725	-93.3546	-83.0026	-94.0977
					1.5775	-103.679	-93.9948	-105.09		1.5775	-94.0396	-83.9949	-98.6795
					1.5825	-104.174	-94.9868	-109.672		1.5825	-96.4037	-84.0609	-98.1796
					1.5875	-106.09	-95.053	-109.172		1.5875	-97.6105	-80.5679	-94.6634
					1.5925	-108.009	-91.56	-105.655		1.5925	-91.5852	-74.6321	-88.5247
					1.5975	-102.267	-85.6242	-99.5168		1.5975	-94.8432	-80.392	-93.37
					1.6025	-105.512	-91.3841	-104.362		1.6025	-93.3545	-85.6979	-97.058
					1.6075	-104.039	-96.6901	-108.05		1.6075	-99.4395	-87.3124	-104.869
					1.6125	-109.619	-98.3046	-115.861		1.6125	-98.9655	-88.5458	-101.65
					1.6175	-109.99	-99.5379	-112.643		1.6175	-100.576	-77.2148	-89.7457
					1.6225	-111.616	-88.2069	-100.738		1.6225	-100.074	-82.7916	-98.1756
					1.6275	-111.833	-93.7838	-109.168		1.6275	-92.7731	-86.9953	-101.526
					1.6325	-103.861	-97.9873	-112.517		1.6325	-96.0179	-85.1045	-96.299
					1.6375	-107.539	-96.0967	-107.291		1.6375	-99.3902	-87.2161	-101.331
					1.6425	-110.815	-98.2083	-112.324		1.6425	-97.6258	-86.3302	-100.902
					1.6475	-108.874	-97.3223	-111.895		1.6475	-99.3025	-85.8117	-99.1691
					1.6525	-108.952	-96.8038	-110.162		1.6525	-97.3139	-90.3245	-104.463
					1.6575	-108.058	-101.317	-115.454		1.6575	-101.507	-86.6635	-100.105
					1.6625	-112.203	-97.6553	-111.098		1.6625	-101.574	-89.5809	-105.674
					1.6675	-114.15	-100.573	-116.663		1.6675	-95.6945	-85.6361	-97.616
					1.6725	-106.015	-96.6283	-108.606		1.6725	-101.392	-84.7044	-99.659
					1.6775	-111.55	-95.6966	-110.651		1.6775	-99.3049	-83.2515	-96.6355
					1.6825	-109.426	-94.2436	-107.629		1.6825	-97.6614	-77.5713	-90.3935
					1.6875	-106.181	-88.5634	-101.385		1.6875	-99.7969	-84.4977	-95.0834
					1.6925	-110.873	-95.4898	-106.075		1.6925	-101.475	-79.5086	-91.0624
					1.6975	-110.131	-90.5006	-102.055		1.6975	-101.907	-82.3784	-98.6688
					1.7025	-109.016	-93.3706	-109.66		1.7025	-98.9046	-88.2471	-101.239
					1.7075	-107.792	-99.2391	-112.232		1.7075	-99.0784	-81.567	-94.3986
					1.7125	-106.459	-92.5591	-105.39		1.7125	-101.916	-85.8023	-101.646
					1.7175	-107.089	-96.7944	-112.638		1.7175	-102.188	-89.4777	-103.737
					1.7225	-107.265	-100.47	-114.728		1.7225	-103.519	-83.1384	-96.2134
					1.7275	-107.586	-94.1305	-107.206		1.7275	-101.445	-89.0098	-104.208
					1.7325	-106.159	-100.002	-115.199		1.7325	-101.588	-94.9872	-109.776
					1.7375	-106.308	-105.979	-120.769		1.7375	-104.696	-93.4904	-107.597
					1.7425	-107.412	-104.482	-118.587		1.7425	-105.077	-94.1368	-108.817
					1.7475	-107.177	-105.129	-119.81		1.7475	-101.663	-80.6589	-94.7163
					1.7525	-105.948	-91.651	-105.708		1.7525	-98.9874	-87.2519	-104.125
					1.7575	-105.64	-98.2439	-115.118		1.7575	-98.2228	-95.3092	-112.56
					1.7625	-104.521	-106.301	-123.552		1.7625	-102.609	-100.87	-112.421
					1.7675	-107.183	-111.863	-123.41		1.7675	-103.95	-96.0759	-108.818
					1.7725	-107.873	-107.068	-119.81		1.7725	-105.245	-90.8489	-104.365
					1.7775	-108.142	-101.841	-115.358		1.7775	-105.485	-93.155	-110.213
					1.7825	-108.37	-104.147	-121.21		1.7825	-104.182	-98.3496	-111.127
					1.7875	-107.644	-109.342	-122.119		1.7875	-103.423	-98.6108	-111.306
					1.7925	-107.974	-109.603	-122.299		1.7925	-102.075	-86.459	-98.964
					1.7975	-109.57	-97.4512	-109.956		1.7975	-102.617	-98.7259	-110.733
					1.8025	-109.256	-109.718	-121.729		1.8025	-103.21	-96.4926	-112.633
					1.8075	-110.678	-107.484	-123.624		1.8075	-103.531	-92.3594	-105.694
					1.8125	-109.837	-103.352	-116.684		1.8125	-101.957	-103.323	-118.09
					1.8175	-111.247	-114.314	-129.085		1.8175	-103.988	-96.0677	-110.711
					1.8225	-110.481	-107.06	-121.708		1.8225	-101.215	-100.265	-114.215
					1.8275	-109.942	-111.257	-125.204		1.8275	-100.806	-103.061	-115.269
					1.8325	-112.095	-114.052	-126.261		1.8325	-102.655	-98.5821	-111.538
					1.8375	-110.896	-109.575	-122.528		1.8375	-103.443	-98.8407	-112.662
					1.8425	-109.989	-109.833	-123.652		1.8425	-103.362	-101.824	-113.597
					1.8475	-109.908	-112.815	-124.589		1.8475	-104.114	-97.2734	-111.744
					1.8525	-109.143	-108.266	-122.737		1.8525	-102.5	-102.148	-120.851
					1.8575	-109.293	-113.141	-131.837		1.8575	-104.001	-102.073	-115.937
					1.8625	-108.51	-113.066	-126.921		1.8625	-103.418	-105.094	-118.152
					1.8675	-108.021	-116.087	-129.149		1.8675	-104.103	-106.416	-118.476
					1.8725	-107.985	-117.408	-129.472		1.8725	-104.019	-107.944	-122.917
					1.8775	-107.463	-118.937	-133.904		1.8775	-104.864	-106.888	-119.422
					1.8825	-107.063	-117.88	-130.424		1.8825	-104.476	-106.103	-124.581
					1.8875	-106.851	-117.094	-135.571		1.8875	-106.436	-109.865	-125.391
					1.8925	-105.882	-120.857	-136.381		1.8925	-104.973	-105.803	-124.903
					1.8975	-106.213	-116.797	-135.886		1.8975	-104.59	-110.086	-127.524
					1.9025	-106.189	-121.075	-138.511		1.9025	-103.122	-98.8868	-111.446
					1.9075	-105.516	-109.88	-122.44		1.9075	-106.401	-109.585	-127.222
					1.9125	-104.927	-120.578	-138.188		1.9125	-108.258	-110.731	-126.692
					1.9175	-104.623	-121.723	-137.693		1.9175	-106.6	-112.024	-127.135
					1.9225	-104.58	-123.015	-138.138		1.9225	-109.34	-110.188	-124.558
					1.9275	-104.081	-121.179	-135.549		1.9275	-108.895	-108.31	-115.923
					1.9325	-104.209	-119.306	-126.911		1.9325	-109.223	-99.4203	-112.951
					1.9375	-103.701	-110.412	-123.945		1.9375	-109.223	-119.312	-135.982
					1.9425	-103.257	-130.314	-146.938		1.9425	-113.946	-104.511	-116.601
					1.9475	-103.278	-115.502	-127.586		1.9475	-111.697	-110.109	-124.813
					1.9525	-103.372	-121.1	-135.804		1.9525	-111.295	-106.967	-120.639
					1.9575	-103.228	-117.96	-131.628		1.9575	-109.658	-114.479	-122.581
					1.9625	-103.141	-125.469	-133.548		1.9625	-107.897	-99.6622	-115.751
					1.9675	-103.37	-110.653	-126.75		1.9675	-106.188	-106.797	-124.222
					1.9725	-102.715	-117.791	-135.217		1.9725	-107.693	-111.892	-126.633
					1.9775	-102.664	-122.881	-137.632		1.9775	-106.525	-113.686	-127.436
					1.9825	-103.04	-124.674	-138.385		1.9825	-106.081	-106.856	-118.104
					1.9875	-102.925	-117.847	-129.096		1.9875	-105.28	-108.493	-126.568
					1.9925	-102.991	-119.486	-137.547		1.9925	-105.031	-111.885	-126.766
					1.9975	-102.906	-122.877	-137.755		1.9975	-104.432	-99.2188	-112.129
					2.0025	-102.941	-110.211	-123.123		2.0025	-104.006	-106.743	-120.172
					2.0075	-102.897	-117.734	-131.169		2.0075	-104.189	-127.558	-146.05
					2.0125	-102.678	-138.54	-156.672		2.0125	-103.477	-111.399	-124.264
					2.0175	-102.731	-122.39	-135.248		2.0175	-103.34	-108.231	-125.123
					2.0225	-102.66	-119.224	-136.106		2.0225	-102.722	-120.727	-153.488
					2.0275	-102.626	-131.698	-163.076		2.0275	-102.807	-108.353	-120.779
					2.0325	-102.54	-119.345	-131.76		2.0325	-102.672	-119.308	-154.283
					2.0375	-102.399	-130.299	-164.108		2.0375	-102.269	-135.13	-164.502
					2.0425	-102.401	-146.094	-169.272		2.0425	-102.307	-140.195	-153.563
					2.0475	-102.226	-150.92	-157.71		2.0475	-102.185	-128.96	-142.288
					2.0525	-102.142	-139.945	-152.898		2.0525	-101.986	-133.265	-161.5
					2.0575	-102.032	-144.204	-167.619		2.0575	-101.961	-146.246	-162.678
					2.0625	-101.92	-156.978	-169.647		2.0625	-101.711	-153.451	-162.159
					2.0675	-101.824	-162.166	-167.719		2.0675	-101.589	-113.798	-126.86
					2.0725	-101.743	-124.791	-137.844		2.0725	-101.434	-131.563	-145.414
					2.0775	-101.621	-142.489	-156.244		2.0775	-101.361	-127.667	-140.919
					2.0825	-101.525	-138.652	-151.943		2.0825	-101.3	-144.868	-157.808
					2.0875	-101.376	-155.571	-166.573		2.0875	-101.276	-156.395	-162.574
					2.0925	-101.266	-162.83	-165.012		2.0925	-101.223	-157.929	-162.139
					2.0975	-101.115	-164.106	-168.704		2.0975	-101.232	-158.387	-163.979
					2.1025	-100.998	-163.816	-168.31		2.1025	-101.218	-158.48	-161.986
					2.1075	-100.838	-163.891	-168.798		2.1075	-101.258	-158.484	-163.817
					2.1125	-100.715	-163.687	-170.105		2.1125	-101.279	-158.302	-162.216
					2.1175	-100.549	-163.621	-168.125		2.1175	-101.363	-158.139	-161.996
					2.1225	-100.418	-163.477	-168.342		2.1225	-101.447	-158.283	-164.969
					2.1275	-100.24	-163.432	-168.048		2.1275	-101.702	-157.762	-161.095
					2.1325	-100.072	-163.521	-166.549		2.1325	-379.298	-379.298	-379.298

## Sheet: IR7
Measured					Old					New
Bands	63	1000	16000		Bands	63	1000	16000		Bands	63	1000	16000
RT60	0.722719	0.682641	0.567767		RT60	1.19823	0.730463	0.467333		RT60	1.16528	0.730463	0.467333
EDT	0	0	0		EDT	0	0	0		EDT	0	0	0
DRR	-44.9962	-13.4514	-16.3104		DRR	-22.8592	-2.82716	-1.40729		DRR	-29.7583	-13.5696	-12.1497
C50	5.42182	3.31704	4.12762		C50	4.70662	4.53975	8.32278		C50	4.53908	2.05148	5.81473
C80	8.12411	7.132	8.33439		C80	7.53994	7.89159	12.5116		C80	7.60491	5.84954	10.2649
D50	77.7026	68.2173	72.1199		D50	74.7201	73.9875	87.1735		D50	73.9845	61.5945	79.2308
TS	0.040031	0.043267	0.040988		TS	0.046526	0.034626	0.018858		TS	0.047609	0.050898	0.03047
Bands	63	1000	16000		Bands	63	1000	16000		Bands	63	1000	16000
0.0025	-16.2526	10.619	2.05261		0.0025	-29.9466	-6.40944	0.221611		0.0025	-19.0906	-0.669013	5.59114
0.0075	3.71749	10.99	7.49766		0.0075	-19.4426	-11.3723	-5.40292		0.0075	-8.60503	-2.99729	2.69461
0.0125	4.17321	9.32296	3.61036		0.0125	-20.908	-14.0398	-8.42275		0.0125	-3.95318	-5.70791	1.28945
0.0175	-1.36174	9.92313	6.72997		0.0175	-15.0784	-16.7084	-9.70258		0.0175	-8.46993	-5.96982	0.561716
0.0225	-3.45026	7.65793	5.10693		0.0225	-19.0974	-16.9631	-10.4304		0.0225	-11.1277	-5.26968	0.254269
0.0275	1.69714	8.41907	3.72328		0.0275	-21.7019	-16.2612	-10.7378		0.0275	-16.2821	-6.9005	-0.579762
0.0325	-2.11605	7.1873	3.79612		0.0325	-26.7926	-17.8928	-11.5719		0.0325	-14.8838	-6.72712	-0.117983
0.0375	-1.17648	7.76477	4.67223		0.0375	-25.6358	-17.7191	-11.1101		0.0375	-13.1665	-5.86026	-1.44112
0.0425	0.259276	6.33772	3.80777		0.0425	-23.9792	-16.8524	-12.4332		0.0425	-13.3831	-5.15905	-1.6934
0.0475	-0.727189	4.76478	0.289211		0.0475	-24.1932	-16.1512	-12.6855		0.0475	-16.5793	-8.82765	-2.45159
0.0525	-12.6684	6.01085	1.80486		0.0525	-27.3469	-19.8197	-13.4437		0.0525	-22.6594	-7.99771	-3.07275
0.0575	-5.27672	5.70981	0.833765		0.0575	-33.7079	-18.9898	-14.0648		0.0575	-11.9774	-6.04205	-4.05549
0.0625	-4.41724	4.45282	0.738443		0.0625	-22.9262	-17.0341	-15.0476		0.0625	-14.8843	-7.68735	-4.50964
0.0675	-10.6368	4.32082	-2.18336		0.0675	-25.6795	-18.6795	-15.5017		0.0675	-16.996	-7.37093	-5.15736
0.0725	-9.60482	3.95409	-0.736308		0.0725	-27.7981	-18.363	-16.1495		0.0725	-20.6513	-9.07579	-5.82922
0.0775	-4.62638	2.67962	0.712262		0.0775	-31.4421	-20.068	-16.8213		0.0775	-17.4522	-10.3826	-5.63943
0.0825	-8.97439	2.13861	-3.89741		0.0825	-28.119	-21.3747	-16.6315		0.0825	-20.2875	-9.30473	-6.29003
0.0875	-14.7235	3.04624	-2.35353		0.0875	-30.4263	-20.2968	-17.2821		0.0875	-27.2299	-10.767	-8.34123
0.0925	-9.58559	1.3933	-1.93535		0.0925	-38.1573	-21.7591	-19.3333		0.0925	-18.2233	-12.1182	-8.57024
0.0975	-8.28528	2.95956	-2.33615		0.0975	-28.8345	-23.1103	-19.5623		0.0975	-19.8141	-10.5346	-9.05994
0.1025	-13.7401	0.972439	-5.38398		0.1025	-30.8913	-21.5267	-20.052		0.1025	-21.8077	-12.1458	-9.51005
0.1075	-4.63176	2.36901	-6.99757		0.1075	-31.7922	-23.138	-20.5021		0.1075	-22.148	-14.4037	-10.0413
0.1125	-7.71403	-1.49418	-4.87347		0.1125	-32.7487	-25.3959	-21.0334		0.1125	-20.0435	-13.1524	-10.6933
0.1175	-9.09422	-0.942179	-5.86018		0.1175	-30.6643	-24.1445	-21.6854		0.1175	-25.5642	-11.3544	-11.5122
0.1225	-13.4872	-2.83512	-6.61219		0.1225	-36.7624	-22.3464	-22.5043		0.1225	-22.6921	-12.2822	-11.84
0.1275	-10.8871	-3.36348	-7.37732		0.1275	-33.0178	-23.2743	-22.8321		0.1275	-25.3612	-12.5966	-13.0345
0.1325	-8.94016	-2.18378	-7.25011		0.1325	-35.4091	-23.5887	-24.0266		0.1325	-27.0772	-15.2671	-13.1233
0.1375	-7.26941	-1.96898	-7.89585		0.1375	-36.8383	-26.2592	-24.1154		0.1375	-26.6932	-15.1353	-14.5676
0.1425	-9.52247	-4.38361	-8.15812		0.1425	-36.2021	-26.1274	-25.5597		0.1425	-23.647	-15.1143	-15.1584
0.1475	-18.8579	-6.94124	-8.0484		0.1475	-33.8099	-26.1064	-26.1505		0.1475	-23.1565	-16.4835	-16.0381
0.1525	-19.5985	-5.53445	-9.18395		0.1525	-33.1236	-27.4756	-27.0302		0.1525	-22.8227	-14.8756	-15.8061
0.1575	-18.8034	-3.96347	-11.6822		0.1575	-32.7729	-25.8678	-26.7982		0.1575	-23.0744	-15.455	-16.7587
0.1625	-18.3705	-4.57706	-11.1999		0.1625	-33.6118	-26.4471	-27.7508		0.1625	-29.5494	-16.3983	-17.0733
0.1675	-20.9557	-6.47739	-10.2059		0.1675	-39.5011	-27.3904	-28.0654		0.1675	-25.7971	-16.6184	-18.5678
0.1725	-20.0743	-7.30128	-12.0621		0.1725	-36.1867	-27.6105	-29.5599		0.1725	-26.7775	-16.1792	-18.3806
0.1775	-22.7025	-6.23166	-11.8461		0.1775	-37.1704	-27.1713	-29.3727		0.1775	-21.5869	-15.9764	-19.166
0.1825	-27.0227	-6.47732	-14.8466		0.1825	-31.9828	-26.9685	-30.1581		0.1825	-22.9362	-18.4864	-19.7968
0.1875	-17.3693	-8.63299	-13.7215		0.1875	-33.3639	-29.4784	-30.7889		0.1875	-24.0587	-18.8016	-21.1508
0.1925	-14.9824	-6.62056	-13.9713		0.1925	-34.3767	-29.7937	-32.1429		0.1925	-23.0059	-18.7611	-21.4923
0.1975	-16.5766	-8.44809	-14.5755		0.1975	-33.4415	-29.7532	-32.4844		0.1975	-24.2916	-19.636	-22.2134
0.2025	-21.2498	-9.50178	-14.8819		0.2025	-35.1006	-30.6281	-33.2055		0.2025	-31.9955	-19.6439	-22.2413
0.2075	-22.9597	-8.8779	-17.6471		0.2075	-42.0793	-30.6359	-33.2334		0.2075	-27.2313	-19.2291	-22.9649
0.2125	-24.8899	-10.2148	-16.6703		0.2125	-38.3251	-30.2212	-33.957		0.2125	-28.5031	-19.8912	-24.2778
0.2175	-20.4208	-14.4356	-15.1292		0.2175	-39.7475	-30.8833	-35.27		0.2175	-23.5661	-21.4029	-24.2635
0.2225	-15.6343	-9.79431	-18.1769		0.2225	-34.3178	-32.395	-35.2556		0.2225	-28.919	-22.498	-24.217
0.2275	-20.4847	-10.9106	-18.3996		0.2275	-39.6514	-33.49	-35.2091		0.2275	-27.4538	-21.296	-25.0185
0.2325	-24.8614	-11.9717	-17.1336		0.2325	-38.181	-32.2881	-36.0106		0.2325	-30.6633	-23.5594	-26.3363
0.2375	-21.5786	-12.2929	-19.6752		0.2375	-41.0274	-34.5515	-37.3284		0.2375	-23.6994	-22.4613	-26.7514
0.2425	-23.7119	-13.755	-19.0358		0.2425	-34.6041	-33.4534	-37.7435		0.2425	-28.8187	-24.0944	-28.1631
0.2475	-30.2888	-14.7178	-19.7158		0.2475	-39.501	-35.0865	-39.1552		0.2475	-26.8881	-24.2708	-27.69
0.2525	-23.3042	-12.0772	-18.1607		0.2525	-37.5404	-35.2628	-38.6821		0.2525	-30.1712	-25.6167	-27.8079
0.2575	-26.3997	-12.8285	-22.2168		0.2575	-41.2553	-36.6088	-38.8		0.2575	-23.0539	-25.0052	-30.1516
0.2625	-28.9191	-14.0594	-21.8888		0.2625	-33.8726	-35.9973	-41.1437		0.2625	-30.1736	-23.71	-31.417
0.2675	-24.2789	-14.5009	-21.862		0.2675	-40.57	-34.702	-42.4091		0.2675	-27.6104	-24.7821	-30.6736
0.2725	-24.4826	-13.9648	-20.7445		0.2725	-38.4548	-35.7743	-41.6657		0.2725	-28.5392	-26.1839	-30.6099
0.2775	-23.4263	-15.9494	-21.303		0.2775	-39.0578	-37.176	-41.602		0.2775	-25.7845	-25.4877	-32.2235
0.2825	-23.4395	-15.7349	-22.5725		0.2825	-36.4462	-36.4799	-43.2156		0.2825	-33.2677	-27.8976	-32.931
0.2875	-29.1297	-15.6927	-20.9106		0.2875	-43.195	-38.8898	-43.9231		0.2875	-32.9105	-27.0026	-34.4916
0.2925	-28.3051	-18.0133	-24.4498		0.2925	-42.9372	-37.9948	-45.4837		0.2925	-33.5752	-24.117	-33.3803
0.2975	-25.2361	-16.5652	-24.4672		0.2975	-43.9738	-35.1092	-44.3724		0.2975	-28.1301	-25.9284	-35.1397
0.3025	-32.7578	-18.1958	-23.1849		0.3025	-38.9698	-36.9205	-46.1318		0.3025	-29.277	-27.0811	-35.8281
0.3075	-33.3964	-17.3191	-25.6936		0.3075	-39.6722	-38.0732	-46.8202		0.3075	-29.2649	-28.9365	-36.6071
0.3125	-23.0073	-16.4808	-24.6758		0.3125	-39.5015	-39.9286	-47.5992		0.3125	-31.431	-28.9413	-36.2068
0.3175	-29.6321	-18.7492	-23.5666		0.3175	-41.2989	-39.9334	-47.1989		0.3175	-31.6183	-29.92	-37.5185
0.3225	-28.0388	-18.9257	-24.7825		0.3225	-41.5413	-40.9121	-48.5106		0.3225	-29.4139	-32.8946	-37.2875
0.3275	-30.4053	-20.9802	-27.3904		0.3275	-39.9	-43.8868	-48.2796		0.3275	-27.8128	-28.9207	-39.2665
0.3325	-29.8228	-18.2607	-25.1543		0.3325	-38.4285	-39.9128	-50.2586		0.3325	-29.2568	-29.7349	-39.1319
0.3375	-32.0366	-18.3244	-26.8702		0.3375	-39.4932	-40.727	-50.124		0.3375	-36.3061	-29.9687	-39.3467
0.3425	-29.3919	-20.9827	-27.5893		0.3425	-45.6704	-40.9608	-50.3387		0.3425	-35.5015	-29.6058	-39.691
0.3475	-33.4291	-20.6173	-29.6457		0.3475	-45.0455	-40.5979	-50.6831		0.3475	-37.1436	-31.4535	-39.9993
0.3525	-36.2959	-19.2365	-29.6855		0.3525	-46.3115	-42.4457	-50.9914		0.3525	-32.9655	-31.0896	-40.9961
0.3575	-36.5057	-20.8397	-28.0049		0.3575	-42.6685	-42.0817	-51.9882		0.3575	-32.7492	-32.1783	-42.9623
0.3625	-31.38	-20.887	-28.7591		0.3625	-42.7078	-43.1704	-53.9544		0.3625	-32.407	-32.9869	-42.9087
0.3675	-29.8502	-20.7697	-28.158		0.3675	-42.6293	-43.9789	-53.9008		0.3675	-37.8225	-36.0009	-42.0248
0.3725	-27.1207	-21.5378	-29.068		0.3725	-47.3061	-46.9929	-53.0169		0.3725	-32.2339	-32.6929	-43.5317
0.3775	-29.5356	-21.5375	-32.351		0.3775	-42.2225	-43.685	-54.5238		0.3775	-34.6409	-32.149	-44.8615
0.3825	-35.4055	-19.7362	-31.0867		0.3825	-44.5801	-43.1411	-55.8536		0.3825	-38.1034	-33.5843	-44.8145
0.3875	-27.652	-18.9343	-28.6064		0.3875	-47.483	-44.5764	-55.8066		0.3875	-33.5439	-36.7135	-46.4693
0.3925	-29.5017	-22.5684	-31.1104		0.3925	-43.4202	-47.7056	-57.4614		0.3925	-35.5094	-37.2889	-46.4381
0.3975	-34.5778	-21.3785	-30.547		0.3975	-45.4717	-48.281	-57.4302		0.3975	-37.6498	-35.0572	-46.8048
0.4025	-35.0951	-24.2327	-31.2749		0.4025	-47.3117	-46.0493	-57.7969		0.4025	-32.3602	-36.8559	-48.108
0.4075	-40.4223	-22.9573	-28.6923		0.4075	-42.5458	-47.848	-59.1001		0.4075	-35.017	-37.4893	-49.8961
0.4125	-36.6381	-22.0426	-32.8731		0.4125	-44.9449	-48.4814	-60.8882		0.4125	-34.9254	-39.0749	-48.9457
0.4175	-40.7698	-21.2758	-33.5202		0.4175	-45.0543	-50.067	-59.9378		0.4175	-40.5783	-37.2203	-49.363
0.4225	-31.1099	-22.4307	-34.8334		0.4225	-50.0273	-48.2124	-60.3551		0.4225	-37.8301	-41.2119	-50.1086
0.4275	-37.7357	-23.7544	-35.4267		0.4275	-47.6094	-52.204	-61.1007		0.4275	-35.9147	-37.8132	-50.283
0.4325	-43.4372	-24.9552	-34.0825		0.4325	-46.0967	-48.8053	-61.2751		0.4325	-37.3139	-38.5592	-51.8095
0.4375	-38.808	-25.8607	-31.5848		0.4375	-47.318	-49.5514	-62.8016		0.4375	-35.7211	-38.2412	-51.471
0.4425	-38.5093	-25.1489	-34.5417		0.4425	-45.9804	-49.2333	-62.4631		0.4425	-36.5342	-39.6235	-53.624
0.4475	-34.8881	-25.9321	-34.6929		0.4475	-46.9322	-50.6156	-64.6161		0.4475	-39.3135	-40.305	-53.3511
0.4525	-36.867	-26.8707	-34.8745		0.4525	-49.7314	-51.2971	-64.3432		0.4525	-38.1684	-43.603	-52.6747
0.4575	-34.0271	-25.2384	-36.4085		0.4575	-48.4609	-54.595	-63.6668		0.4575	-42.6003	-39.3897	-53.5538
0.4625	-35.3056	-27.1187	-34.3506		0.4625	-52.6763	-50.3818	-64.5459		0.4625	-38.5812	-41.3377	-54.7654
0.4675	-43.616	-27.1044	-35.9576		0.4675	-48.9806	-52.3298	-65.7575		0.4675	-38.9124	-42.8016	-55.6845
0.4725	-36.7978	-26.6729	-36.4926		0.4725	-49.3505	-53.7937	-66.6766		0.4725	-41.1621	-43.4373	-55.676
0.4775	-40.3752	-27.8271	-34.8306		0.4775	-51.4324	-54.4294	-66.6681		0.4775	-37.8352	-40.2686	-55.9509
0.4825	-38.3644	-26.1757	-35.9667		0.4825	-48.3508	-51.2606	-66.943		0.4825	-38.7987	-41.3041	-57.0128
0.4875	-34.7128	-26.5898	-36.8473		0.4875	-49.2714	-52.2962	-68.0049		0.4875	-38.6093	-43.5417	-56.323
0.4925	-33.939	-28.5667	-36.675		0.4925	-49.0676	-54.5338	-67.3151		0.4925	-41.5485	-45.6494	-57.9065
0.4975	-36.9981	-26.0154	-37.0807		0.4975	-51.8027	-56.6414	-68.8986		0.4975	-42.3831	-40.9666	-58.9703
0.5025	-39.2181	-26.1013	-34.9994		0.5025	-52.564	-51.9587	-69.9624		0.5025	-41.1966	-42.2081	-58.7742
0.5075	-38.8551	-28.3681	-35.2338		0.5075	-51.5004	-53.2002	-69.7663		0.5075	-40.1554	-43.3259	-60.2916
0.5125	-42.7394	-25.9995	-38.9583		0.5125	-50.5484	-54.318	-71.2837		0.5125	-44.6068	-43.8446	-59.2392
0.5175	-45.1295	-26.9364	-37.1725		0.5175	-54.4731	-54.8367	-70.2313		0.5175	-48.6042	-44.6649	-61.5825
0.5225	-37.5654	-31.0499	-37.2022		0.5225	-57.867	-55.6569	-72.5746		0.5225	-42.1951	-44.6651	-61.8945
0.5275	-37.7412	-30.1931	-37.3327		0.5275	-52.4268	-55.6571	-72.8866		0.5275	-44.4125	-44.5171	-61.7931
0.5325	-34.9642	-30.842	-38.0761		0.5325	-54.1919	-55.5092	-72.7852		0.5325	-44.9614	-48.1623	-63.133
0.5375	-35.3278	-27.8405	-38.1211		0.5375	-54.8091	-59.1543	-74.1251		0.5375	-42.4596	-47.1423	-61.5485
0.5425	-45.5686	-31.349	-39.104		0.5425	-52.5241	-58.1343	-72.5406		0.5425	-42.3744	-48.3947	-64.4805
0.5475	-41.6468	-27.9549	-41.1985		0.5475	-52.2027	-59.3868	-75.4726		0.5475	-45.0509	-49.0429	-61.1703
0.5525	-47.3882	-30.3866	-40.8698		0.5525	-54.4405	-60.035	-72.1624		0.5525	-46.1651	-43.7348	-63.5605
0.5575	-46.0708	-31.2432	-41.803		0.5575	-55.3146	-54.7269	-74.5526		0.5575	-42.4505	-44.4904	-65.3928
0.5625	-40.5923	-31.3346	-41.8977		0.5625	-52.3417	-55.4824	-76.3849		0.5625	-43.9593	-49.3907	-64.5402
0.5675	-39.8722	-31.3797	-41.7738		0.5675	-53.4403	-60.3828	-75.5323		0.5675	-46.9447	-52.3085	-67.3535
0.5725	-39.9058	-30.5548	-44.5655		0.5725	-56.4843	-63.3007	-78.3455		0.5725	-47.4232	-52.2729	-67.8423
0.5775	-44.7356	-31.4876	-41.1748		0.5775	-56.5255	-63.265	-78.8344		0.5775	-47.2264	-52.3253	-65.5996
0.5825	-40.9332	-31.1325	-41.1156		0.5825	-56.1439	-63.3174	-76.5917		0.5825	-46.2559	-54.1964	-69.9333
0.5875	-42.6284	-30.6838	-41.6589		0.5875	-55.6881	-65.1885	-80.9253		0.5875	-45.1049	-51.3707	-71.4504
0.5925	-48.4756	-31.7759	-42.1053		0.5925	-54.5252	-62.3628	-82.4425		0.5925	-48.8041	-55.2908	-68.9338
0.5975	-46.5255	-31.8017	-42.9343		0.5975	-57.5853	-66.2829	-79.9259		0.5975	-46.4872	-53.9534	-73.7437
0.6025	-45.3381	-31.4632	-42.2532		0.6025	-55.8655	-64.9455	-84.7357		0.6025	-47.9313	-57.8038	-73.8033
0.6075	-48.4813	-29.3354	-44.0115		0.6075	-56.9582	-68.7959	-84.7955		0.6075	-43.9167	-52.3542	-71.5695
0.6125	-52.2208	-32.5009	-41.9435		0.6125	-53.711	-63.3463	-82.5616		0.6125	-46.7092	-56.959	-74.709
0.6175	-41.4021	-32.8135	-43.5754		0.6175	-56.1149	-67.9511	-85.7012		0.6175	-47.9367	-57.9868	-78.5104
0.6225	-43.2474	-33.6144	-42.6268		0.6225	-57.2878	-68.979	-89.5025		0.6225	-48.8854	-61.2009	-75.1044
0.6275	-38.988	-33.7522	-44.4284		0.6275	-58.1389	-72.193	-86.0966		0.6275	-47.7747	-59.1706	-75.6107
0.6325	-42.441	-33.4887	-41.9158		0.6325	-57.2633	-70.1628	-86.6028		0.6325	-49.0349	-59.0703	-78.9022
0.6375	-44.4607	-32.3392	-44.3834		0.6375	-58.3844	-70.0623	-89.8941		0.6375	-49.527	-61.8907	-79.3798
0.6425	-43.8795	-30.0578	-43.6556		0.6425	-58.8963	-72.8828	-90.3718		0.6425	-49.6249	-60.0079	-77.2971
0.6475	-48.578	-32.6043	-43.9827		0.6475	-59.0796	-71	-88.2891		0.6475	-48.5895	-59.7273	-78.3675
0.6525	-45.0686	-34.2345	-43.5708		0.6525	-58.3051	-70.7195	-89.3595		0.6525	-48.8214	-66.847	-83.3598
0.6575	-43.064	-34.7011	-43.9352		0.6575	-58.6411	-77.8391	-94.3516		0.6575	-49.6563	-67.9719	-87.1372
0.6625	-49.442	-32.0378	-44.1952		0.6625	-59.5019	-78.964	-98.1296		0.6625	-49.7655	-66.2266	-86.9225
0.6675	-44.0177	-32.6917	-45.3265		0.6675	-59.6538	-77.2187	-97.914		0.6675	-50.6794	-69.4992	-91.786
0.6725	-50.4437	-34.0915	-43.6743		0.6725	-60.5793	-80.4914	-102.778		0.6725	-51.3025	-66.5669	-86.2916
0.6775	-46.6629	-36.4234	-46.8025		0.6775	-61.2047	-77.559	-97.2841		0.6775	-50.6623	-71.9722	-91.2844
0.6825	-43.0766	-34.8961	-46.876		0.6825	-60.7167	-82.9643	-102.276		0.6825	-50.5172	-66.3769	-89.9072
0.6875	-48.4844	-33.8531	-44.6244		0.6875	-60.6522	-77.3689	-100.899		0.6875	-49.809	-64.9946	-89.8438
0.6925	-44.3242	-34.9644	-46.8477		0.6925	-60.0709	-75.9866	-100.836		0.6925	-50.0429	-67.9962	-87.8841
0.6975	-52.3145	-34.0931	-46.3271		0.6975	-60.3357	-78.9883	-98.8759		0.6975	-49.5501	-68.0521	-93.7945
0.7025	-47.2045	-35.7508	-46.8868		0.7025	-59.9227	-79.0442	-104.785		0.7025	-50.07	-70.8126	-88.5549
0.7075	-50.1444	-35.2353	-47.1778		0.7075	-60.4226	-81.8047	-99.5473		0.7075	-51.4043	-71.5566	-89.0998
0.7125	-41.4175	-32.5852	-45.1369		0.7125	-61.6746	-82.5487	-100.092		0.7125	-51.9997	-76.2443	-94.9258
0.7175	-46.4879	-32.0738	-48.1535		0.7175	-62.2341	-87.2364	-105.917		0.7175	-52.0457	-73.7994	-100.507
0.7225	-52.8401	-36.7731	-47.4847		0.7225	-62.2849	-84.7915	-111.498		0.7225	-52.2732	-77.6232	-104.142
0.7275	-44.2158	-36.245	-47.181		0.7275	-62.5156	-88.6155	-115.133		0.7275	-51.6147	-75.7432	-95.8774
0.7325	-43.8349	-34.8095	-46.7566		0.7325	-61.8728	-86.7353	-106.87		0.7325	-52.0914	-81.7618	-104.311
0.7375	-46.5133	-35.6834	-48.4349		0.7375	-62.2897	-92.754	-115.305		0.7375	-52.1116	-81.9103	-96.8313
0.7425	-48.7291	-34.6009	-49.8898		0.7425	-62.2742	-92.9023	-107.824		0.7425	-52.4333	-79.3663	-97.992
0.7475	-45.7527	-38.3572	-47.1306		0.7475	-62.5157	-90.3586	-108.98		0.7475	-52.7815	-87.5322	-119.316
0.7525	-45.7711	-36.9676	-48.3689		0.7525	-62.8026	-98.525	-130.283		0.7525	-52.965	-93.9136	-134.672
0.7575	-48.5898	-35.9079	-49.3899		0.7575	-62.936	-104.905	-145.763		0.7575	-53.1275	-88.1636	-117.782
0.7625	-48.4535	-35.0585	-48.9495		0.7625	-63.0485	-99.1559	-128.791		0.7625	-53.2993	-89.8149	-112.381
0.7675	-48.0987	-34.0553	-47.556		0.7675	-63.1745	-100.807	-123.373		0.7675	-53.8136	-81.3121	-119.32
0.7725	-52.9514	-37.0898	-49.6694		0.7725	-63.6174	-92.3042	-130.338		0.7725	-53.5945	-90.3235	-148.363
0.7775	-43.3086	-38.6319	-48.9949		0.7775	-63.4069	-101.315	-159.99		0.7775	-54.257	-100.037	-149.192
0.7825	-44.5661	-35.23	-51.3641		0.7825	-63.9821	-111.028	-159.467		0.7825	-54.4054	-113.132	-149.871
0.7875	-47.8836	-40.0412	-48.3677		0.7875	-64.1102	-124.135	-158.875		0.7875	-54.6221	-126.546	-151.528
0.7925	-47.1062	-36.3497	-50.8277		0.7925	-64.304	-137.627	-160.077		0.7925	-54.796	-139.803	-150.678
0.7975	-46.1562	-37.2703	-51.132		0.7975	-64.4655	-150.581	-160.095		0.7975	-55.008	-151.284	-150.22
0.8025	-47.6767	-37.3798	-49.1531		0.8025	-64.6743	-161.149	-160.997		0.8025	-55.1786	-109.114	-131.644
0.8075	-47.3878	-36.1915	-51.8079		0.8075	-64.8504	-120.104	-142.634		0.8075	-55.4138	-104.056	-138.023
0.8125	-49.3783	-37.5719	-51.8561		0.8125	-65.0928	-115.049	-148.96		0.8125	-55.6636	-104.592	-139.118
0.8175	-53.8553	-37.3347	-49.8692		0.8175	-65.3524	-115.583	-149.874		0.8175	-55.7575	-114.494	-146.16
0.8225	-47.643	-36.3977	-50.14		0.8225	-65.4875	-125.488	-156.969		0.8225	-55.9564	-109.342	-132.921
0.8275	-50.773	-38.9198	-50.2079		0.8275	-65.7115	-120.338	-143.87		0.8275	-56.1936	-101.092	-128.865
0.8325	-48.6388	-37.5271	-50.8314		0.8325	-65.9794	-112.085	-139.887		0.8325	-56.2828	-96.8156	-124.944
0.8375	-49.6382	-38.8803	-52.8633		0.8375	-66.1148	-107.808	-135.942		0.8375	-56.636	-96.002	-122.74
0.8425	-46.2617	-38.2056	-52.0596		0.8425	-66.492	-106.993	-133.716		0.8425	-56.5275	-96.1957	-148.946
0.8475	-48.9737	-37.7906	-49.8532		0.8475	-66.455	-107.189	-159.505		0.8475	-57.3902	-97.7144	-119.46
0.8525	-50.863	-37.6092	-50.2856		0.8525	-67.2749	-108.703	-130.449		0.8525	-57.4383	-103.033	-134.235
0.8575	-47.7178	-35.707	-50.4594		0.8575	-67.3686	-114.025	-145.094		0.8575	-57.5126	-100.801	-129.71
0.8625	-47.4469	-36.8416	-51.8905		0.8625	-67.4826	-111.792	-140.69		0.8625	-57.6786	-104.6	-143.341
0.8675	-52.6421	-40.2531	-51.6679		0.8675	-67.6676	-115.595	-153.968		0.8675	-57.7879	-104.505	-143.349
0.8725	-56.118	-37.0658	-51.006		0.8725	-67.787	-115.499	-154.32		0.8725	-58.1216	-87.5088	-115.345
0.8775	-50.9162	-39.2298	-52.0434		0.8775	-68.0921	-98.5004	-126.335		0.8775	-58.393	-82.2624	-109.568
0.8825	-55.6331	-37.0338	-52.7232		0.8825	-68.3336	-93.2546	-120.561		0.8825	-58.4459	-86.6403	-146.478
0.8875	-55.947	-36.2421	-52.2795		0.8875	-68.3738	-97.6324	-155.529		0.8875	-59.0676	-95.5934	-124.927
0.8925	-53.4399	-40.4422	-52.2063		0.8925	-68.8886	-106.584	-135.938		0.8925	-59.478	-91.0546	-127.315
0.8975	-51.1658	-38.4067	-53.8168		0.8975	-69.2264	-102.047	-138.326		0.8975	-59.5303	-95.356	-123.413
0.9025	-59.0237	-37.8877	-52.2489		0.9025	-69.237	-106.35	-134.414		0.9025	-59.7262	-89.4514	-125.071
0.9075	-59.4803	-38.4034	-51.9826		0.9075	-69.3456	-100.444	-136.071		0.9075	-60.4191	-86.4566	-119.62
0.9125	-52.0668	-40.3329	-52.9626		0.9125	-69.8768	-97.4476	-130.615		0.9125	-60.6561	-84.5465	-123.733
0.9175	-53.1775	-37.5143	-51.9931		0.9175	-70.0261	-95.5393	-134.751		0.9175	-60.5522	-91.5928	-151.983
0.9225	-57.0017	-40.6138	-51.7762		0.9225	-69.92	-102.582	-160.293		0.9225	-60.6578	-97.5073	-129.582
0.9275	-52.7645	-39.5051	-53.2429		0.9275	-69.9362	-108.502	-140.557		0.9275	-61.008	-95.1535	-129.991
0.9325	-48.6549	-38.3941	-52.8193		0.9325	-70.1878	-106.147	-140.839		0.9325	-61.3723	-99.8937	-133.268
0.9375	-48.4087	-39.2581	-51.9257		0.9375	-70.4505	-110.884	-144.103		0.9375	-61.5492	-95.4386	-129.632
0.9425	-51.3437	-42.0587	-52.8982		0.9425	-70.5793	-106.431	-140.624		0.9425	-61.7072	-103.891	-140.776
0.9475	-46.1951	-39.2091	-53.0195		0.9475	-70.7045	-114.874	-151.363		0.9475	-61.9581	-94.6862	-127.726
0.9525	-48.5986	-38.728	-53.5931		0.9525	-70.9447	-105.679	-138.729		0.9525	-62.296	-95.3949	-128.954
0.9575	-47.354	-38.9001	-52.7691		0.9575	-71.2765	-106.388	-139.875		0.9575	-62.556	-89.0255	-123.157
0.9625	-46.1937	-36.2351	-53.8219		0.9625	-71.5559	-100.018	-134.111		0.9625	-62.6261	-90.7987	-129.482
0.9675	-49.3647	-40.9741	-53.7403		0.9675	-71.7447	-101.791	-140.521		0.9675	-62.7821	-103.341	-151.902
0.9725	-49.375	-40.0534	-53.595		0.9725	-72.0089	-114.327	-161.378		0.9725	-63.0372	-112.418	-151.493
0.9775	-47.5912	-40.3607	-51.5025		0.9775	-72.393	-123.391	-160.485		0.9775	-63.1688	-125.577	-151.893
0.9825	-48.1054	-39.7581	-53.6404		0.9825	-72.7182	-136.708	-161.089		0.9825	-63.2573	-138.707	-152.394
0.9875	-50.0849	-43.8618	-53.1737		0.9875	-73.035	-150.077	-160.818		0.9875	-63.372	-149.653	-152.485
0.9925	-46.7527	-38.735	-53.77		0.9925	-73.4126	-158.993	-162.25		0.9925	-63.4352	-153.034	-151.816
0.9975	-53.0935	-39.8065	-53.2884		0.9975	-73.7726	-160.709	-160.808		0.9975	-63.5242	-152.564	-151.283
1.0025	-49.166	-36.0132	-52.8317		1.0025	-74.1939	-161.32	-161.478		1.0025	-63.5687	-152.51	-152.2
1.0075	-52.1319	-39.4685	-53.3429		1.0075	-74.5984	-160.871	-161.558		1.0075	-63.6527	-152.093	-152.613
1.0125	-60.4684	-38.1318	-53.2744		1.0125	-75.0628	-161.307	-161.126		1.0125	-63.6979	-152.318	-151.924
1.0175	-52.8434	-41.5296	-52.4245		1.0175	-75.5037	-160.561	-161.048		1.0175	-63.7867	-107.062	-130.618
1.0225	-53.8197	-41.0576	-53.898		1.0225	-75.9975	-118.055	-141.592		1.0225	-63.8829	-107.229	-132.644
1.0275	-55.1547	-40.8445	-52.7962		1.0275	-76.5153	-118.226	-143.667		1.0275	-64.0226	-107.976	-151.188
1.0325	-50.9533	-40.6631	-53.2176		1.0325	-77.0317	-118.962	-161.388		1.0325	-63.9575	-114.408	-151.426
1.0375	-57.859	-38.6917	-52.7797		1.0375	-77.3091	-125.402	-161.616		1.0375	-64.167	-113.838	-129.358
1.0425	-379.298	-379.298	-379.298		1.0425	-77.8732	-124.819	-140.288		1.0425	-64.2638	-105.918	-150.108
1.0475	-379.298	-379.298	-379.298		1.0475	-78.2286	-116.915	-159.565		1.0475	-64.5846	-113.479	-151.471
1.0525	-379.298	-379.298	-379.298		1.0525	-78.799	-124.504	-161.528		1.0525	-64.6802	-124.058	-152.119
1.0575	-379.298	-379.298	-379.298		1.0575	-78.9671	-134.907	-161.153		1.0575	-64.9002	-137.512	-152.867
1.0625	-379.298	-379.298	-379.298		1.0625	-79.1593	-147.743	-161.219		1.0625	-65.1185	-147.564	-152.489
1.0675	-379.298	-379.298	-379.298		1.0675	-79.2312	-157.626	-161.43		1.0675	-65.4117	-150.957	-151.913
1.0725	-379.298	-379.298	-379.298		1.0725	-79.2562	-159.253	-158.38		1.0725	-65.7106	-102.591	-129.623
1.0775	-379.298	-379.298	-379.298		1.0775	-79.1658	-113.582	-140.612		1.0775	-66.0744	-108.904	-151.934
1.0825	-379.298	-379.298	-379.298		1.0825	-79.0983	-119.913	-160.927		1.0825	-66.3665	-118.872	-153.068
1.0875	-379.298	-379.298	-379.298		1.0875	-78.7119	-129.765	-161.611		1.0875	-66.865	-131.702	-153.117
1.0925	-379.298	-379.298	-379.298		1.0925	-78.52	-142.628	-161.727		1.0925	-67.3488	-143.402	-152.897
1.0975	-379.298	-379.298	-379.298		1.0975	-78.2448	-155.152	-162.128		1.0975	-67.9217	-149.531	-153.045
1.1025	-379.298	-379.298	-379.298		1.1025	-77.995	-157.858	-162.308		1.1025	-68.5119	-150.609	-152.324
1.1075	-379.298	-379.298	-379.298		1.1075	-77.7055	-157.517	-159.825		1.1075	-69.2149	-149.954	-151.199
1.1125	-379.298	-379.298	-379.298		1.1125	-77.4681	-157.855	-160.551		1.1125	-69.9615	-148.963	-149.686
1.1175	-379.298	-379.298	-379.298		1.1175	-77.2095	-156.295	-157.755		1.1175	-70.8438	-149.431	-148.25
1.1225	-379.298	-379.298	-379.298		1.1225	-77.0134	-156.94	-157.925		1.1225	-71.7996	-149.827	-149.934
1.1275	-379.298	-379.298	-379.298		1.1275	-76.8066	-157.486	-159.611		1.1275	-72.9239	-149.695	-150.865
1.1325	-379.298	-379.298	-379.298		1.1325	-76.6691	-157.184	-159.673		1.1325	-74.1685	-149.04	-150.786
1.1375	-379.298	-379.298	-379.298		1.1375	-76.5223	-157.219	-161.232		1.1375	-75.6443	-149.268	-150.747
1.1425	-379.298	-379.298	-379.298		1.1425	-76.4467	-156.615	-160.083		1.1425	-77.2992	-149.16	-150.681
1.1475	-379.298	-379.298	-379.298		1.1475	-76.3648	-156.578	-159.787		1.1475	-79.1899	-148.342	-150.33
1.1525	-379.298	-379.298	-379.298		1.1525	-76.3573	-156.691	-160.256		1.1525	-81.0357	-148.958	-151.038
1.1575	-379.298	-379.298	-379.298		1.1575	-76.347	-156.42	-160.343		1.1575	-82.2905	-148.485	-150.328
1.1625	-379.298	-379.298	-379.298		1.1625	-76.4137	-156.203	-159.676		1.1625	-82.0487	-148.352	-150.364
1.1675	-379.298	-379.298	-379.298		1.1675	-76.4798	-155.994	-159.96		1.1675	-80.6097	-148.735	-150.143
1.1725	-379.298	-379.298	-379.298		1.1725	-76.6241	-155.826	-160.268		1.1725	-78.7736	-148.12	-151.235
1.1775	-379.298	-379.298	-379.298		1.1775	-76.7708	-155.823	-160.505		1.1775	-77.0725	-148.519	-151.189
1.1825	-379.298	-379.298	-379.298		1.1825	-76.9966	-155.465	-160.91		1.1825	-75.5458	-147.298	-150.115
1.1875	-379.298	-379.298	-379.298		1.1875	-77.2224	-155.417	-158.347		1.1875	-74.2693	-147.78	-150.04
1.1925	-379.298	-379.298	-379.298		1.1925	-77.5309	-154.793	-160.698		1.1925	-73.1358	-147.744	-150.44
1.1975	-379.298	-379.298	-379.298		1.1975	-77.8451	-154.851	-159.692		1.1975	-72.19	-147.588	-151.113
1.2025	-379.298	-379.298	-379.298		1.2025	-78.2446	-154.623	-159.628		1.2025	-71.3319	-147.314	-151.834
1.2075	-379.298	-379.298	-379.298		1.2075	-78.6516	-154.88	-161.315		1.2075	-70.6207	-146.869	-149.638
1.2125	-379.298	-379.298	-379.298		1.2125	-79.1488	-153.601	-155.637		1.2125	-69.9625	-146.753	-147.939
1.2175	-379.298	-379.298	-379.298		1.2175	-79.6585	-154.085	-157.911		1.2175	-69.4271	-146.343	-149.706
1.2225	-379.298	-379.298	-379.298		1.2225	-80.2598	-154.056	-159.863		1.2225	-68.9249	-146.875	-150.566
1.2275	-379.298	-379.298	-379.298		1.2275	-80.8714	-153.784	-160.627		1.2275	-68.527	-146.18	-150.121
1.2325	-379.298	-379.298	-379.298		1.2325	-81.5634	-153.702	-160.294		1.2325	-68.1479	-146.154	-150.755
1.2375	-379.298	-379.298	-379.298		1.2375	-82.2417	-153.359	-160.368		1.2375	-67.861	-146.114	-150.371
1.2425	-379.298	-379.298	-379.298		1.2425	-82.958	-153.234	-160.836		1.2425	-67.5815	-145.538	-150.396
1.2475	-379.298	-379.298	-379.298		1.2475	-83.5914	-153.073	-159.69		1.2475	-67.3862	-145.117	-152.183
					1.2525	-84.1582	-152.851	-161.565		1.2525	-67.1921	-145.011	-151.551
					1.2575	-84.4999	-152.71	-160.909		1.2575	-67.0747	-145.384	-150.623
					1.2625	-84.6317	-152.329	-161.477		1.2625	-66.9549	-144.943	-151.373
					1.2675	-84.4467	-152.115	-161.314		1.2675	-66.9098	-144.643	-151.917
					1.2725	-84.0453	-151.926	-160.9		1.2725	-66.8584	-144.639	-151.827
					1.2775	-83.4124	-151.465	-161.59		1.2775	-66.8774	-143.955	-151.535
					1.2825	-82.6998	-151.77	-160.77		1.2825	-66.8863	-143.922	-151.396
					1.2875	-81.8963	-151.209	-160.494		1.2875	-66.9639	-143.634	-150.73
					1.2925	-81.1231	-151.23	-160.353		1.2925	-67.0316	-143.791	-152
					1.2975	-80.3282	-150.631	-160.986		1.2975	-67.1678	-143.552	-148.265
					1.3025	-79.6053	-150.185	-150.824		1.3025	-67.2948	-142.59	-146.112
					1.3075	-78.8772	-149.885	-155.467		1.3075	-67.4946	-142.591	-146.028
					1.3125	-78.2197	-150.076	-156.988		1.3125	-67.7021	-142.424	-148.584
					1.3175	-77.5397	-149.625	-159.262		1.3175	-68.0335	-142.278	-147.867
					1.3225	-76.8842	-149.349	-157.475		1.3225	-68.5789	-141.761	-148.942
					1.3275	-76.0494	-149.144	-157.603		1.3275	-379.298	-379.298	-379.298
